# Supplementary material
Source: PubMed Central journal article supplement (PMC3993614)

*Supporting Information for*

**Synthesis of a Miniature Lipoarabinomannan**

Jian Gao <sup>a</sup>, Guochao Liao <sup>a</sup>, Lizhen Wang <sup>b</sup>, and Zhongwu Guo <sup>a,b,\*</sup>

<sup>a</sup> *Department of Chemistry, Wayne State University, Detroit, Michigan 48202, USA*

<sup>b</sup> *National Glycoengineering Research Center, Shandong University, Jinan 250100, China*

\* Corresponding author, E-mail: [zwguo@chem.wayne.edu](mailto:zwguo@chem.wayne.edu)

**Table of Contents:**

|                                         |            |
|-----------------------------------------|------------|
| I. Experimental Section -----           | page 2-22  |
| II. NMR spectra -----                   | page 23-68 |
| NMR spectra of compound <b>8</b> -----  | page 23-24 |
| NMR spectra of compound <b>9</b> -----  | page 25-26 |
| NMR spectra of compound <b>15</b> ----- | page 27-30 |
| NMR spectra of compound <b>16</b> ----- | page 31-34 |
| NMR spectra of compound <b>17</b> ----- | page 35-38 |
| NMR spectra of compound <b>7</b> -----  | page 39-42 |
| NMR spectra of compound <b>5</b> -----  | page 43-46 |
| NMR spectra of compound <b>3</b> -----  | page 47-50 |
| NMR spectra of compound <b>19</b> ----- | page 51-54 |
| NMR spectra of compound <b>20</b> ----- | page 55-58 |
| NMR spectra of compound <b>22</b> ----- | page 59-62 |
| NMR spectra of compound <b>2</b> -----  | page 63-66 |
| NMR spectra of compound <b>1</b> -----  | page 67-68 |

## I. Experimental Section:

### General Methods.

Chemicals and materials were obtained from commercial sources, and were used as received without further purification unless otherwise noted. Molecular sieve 4Å was flame-dried under high vacuum and cooled under N<sub>2</sub> atmosphere immediately before use. Analytical TLC was carried out on Silica Gel 60Å F<sub>254</sub> plates with detection by a UV detector and/or by charring with 15% H<sub>2</sub>SO<sub>4</sub> in EtOH (v/v). Mass spectrometry (MS) was performed on a MALDI-TOF MS machine or a high resolution ESI-TOF MS machine. NMR spectra were recorded on a 400, 600 or 700 MHz machine with chemical shifts reported in ppm ( $\delta$ ) downfield from internal tetramethylsilane (TMS) reference. Signals are described as s (singlet), d (doublet), t (triplet), q (quintet) or m (multiplet), and the coupling constants are reported in Hz.

### *p*-Tolyl 2-*O*-acetyl-3,5-di-*O*-benzyl-1-thio- $\alpha$ -D-arabinofuranoside (**8**):

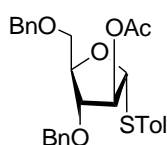

To a stirred solution of **12** (8.0 g, 25 mmol) in 20 mL of anhydrous CH<sub>2</sub>Cl<sub>2</sub> were added AcBr (2.8 mL, 38 mmol) and CH<sub>3</sub>OH (1.5 mL, 38 mmol) at 0°C. The mixture was stirred at rt for 2 h, when TLC indicated the disappearance of **12**. 2,6-Lutidine (8.7 mL, 75 mmol) and CH<sub>3</sub>OH (10 mL) were then added dropwise at rt. Five hours later, the solvent was evaporated *in vacuo* to give a white solid, which was dissolved in 30 mL of CH<sub>3</sub>OH, and then CH<sub>3</sub>ONa in CH<sub>3</sub>OH (1.0 M) was added until the pH reached 10. The reaction mixture was stirred at rt for 3 h, and

the solvent was removed *in vacuo*. The residue was purified by column chromatography with CH<sub>3</sub>OH and CH<sub>2</sub>Cl<sub>2</sub> (1:15) as the eluent to produce **13** (3.4 g, 65% overall) as colorless syrup. To the solution of **13** (3.4 g, 16.5 mmol) in 20 mL of DMF was slowly added NaH (1.98 g, 49.5 mmol, 60%). Thirty minutes later, BnBr (7.06 g, 41.3 mmol) was added dropwise to the reaction mixture, which was warmed to rt, stirred for another hour and quenched with CH<sub>3</sub>OH before water was added. The aq. phase was extracted with EtOAc (3×50 mL) and the organic layer was combined, dried over Na<sub>2</sub>SO<sub>4</sub>, and concentrated. The residue was purified by silica gel column chromatography with EtOAc and hexane (1:15) as the eluent to afford colorless syrup (4.5 g, 71%), a part of which (3.5 g, 9.07 mmol) was mixed with *p*-thiocresol (1.35 g, 10.88 mmol) and activated MS 4Å in 20 mL of anhydrous CH<sub>2</sub>Cl<sub>2</sub>. To the mixture was added a catalytic amount of SnCl<sub>4</sub> (0.9 mmol, 1M in CH<sub>2</sub>Cl<sub>2</sub>) at 0 °C. The reaction mixture was stirred for 0.5 h, quenched with triethylamine, and concentrated under reduced pressure. The residue was purified by silica gel column chromatography with EtOAc and hexane (1:15) as the eluent to afford **8** (3.6 g, 83%) as colorless syrup. <sup>1</sup>H NMR (400 MHz, CDCl<sub>3</sub>): δ 7.41 (d, *J* = 8.0 Hz, 2H, Ph), 7.36-7.23 (m, 10H, Ph), 7.10 (d, *J* = 8.0 Hz, 2H, Ph), 5.50 (s, 1H, H-2), 5.29 (t, *J* = 1.6 Hz, 1H, H-1), 4.74 (d, *J* = 12.0 Hz, 1H, Bn), 4.60-4.44 (m, 4H, H-4, Bn), 3.98 (dd, *J* = 4.6, 1H, H-3), 3.63 (m, 2H, H-5, H-5'), 2.31 (s, 3H, Tol), 1.99 (s, 3H, Ac). <sup>13</sup>C NMR (100 MHz, CDCl<sub>3</sub>): δ 169.88, 138.04, 137.59, 132.35, 130.59, 129.73, 128.43, 128.36, 127.93, 127.87, 127.72, 127.68, 91.44, 83.08, 81.97, 81.92, 73.40, 72.23, 68.85, 21.14, 20.90. HR ESI-TOF MS (*m/z*): calcd for C<sub>28</sub>H<sub>30</sub>O<sub>5</sub>SNa [M + Na]<sup>+</sup>, 501.1712; found, 501.1718. ESI MS (*m/z*): found, 501.4.

***p*-Tolyl 2-*O*-acetyl-3-*O*-benzyl-5-*O*-*tert*-butyldimethylsilyl-1-thio- $\alpha$ -D-arabinofuranoside (**9**):**

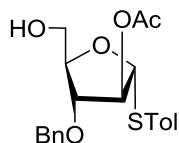

To a solution of **13** (3.0 g, 14.56 mmol) and triethylamine (4.41 g, 43.69 mmol) in 30 mL of pyridine were added TBSCl (2.63 g, 17.48 mmol) and a catalytic amount of DMAP at 0 °C. The reaction mixture was warmed up to rt and stirred for another 5 h. The solution was then concentrated under reduced pressure, and the residue was purified by silica gel column chromatography with EtOAc and hexane (1:4) as the eluent to give a colorless syrup product (3.96 g, 85%). To its solution (1.8 g, 5.63 mmol) in 20 mL of anhydrous DMF was slowly added NaH (450 mg, 11.26 mmol, 60% in oil) at 0 °C. Thirty minutes later, BnBr (1.45 g, 8.45 mmol) was added dropwise. The reaction mixture was warmed to rt slowly and stirred for another 1 h at rt, quenched with MeOH, diluted with water (100 mL), and extracted with EtOAc (2×100 mL). The organic layer, after being dried with Na<sub>2</sub>SO<sub>4</sub>, was concentrated, and the residue was purified by silica gel column chromatography with EtOAc and hexane (1:10) as the eluent to produce **14** (2.03 g, 88%), a part of which (1.3 g, 3.17 mmol) was mixed with *p*-thiocresol (472 mg, 3.81 mmol), and freshly activated molecular sieves 4Å in 20 mL of anhydrous CH<sub>2</sub>Cl<sub>2</sub>. To the mixture was added a catalytic amount of SnCl<sub>4</sub> (0.4 mmol, 1M in CH<sub>2</sub>Cl<sub>2</sub>) at 0 °C. Thirty minutes later, the reaction was quenched with triethylamine, filtered, and concentrated. To a solution of the residue in 20 mL of THF were added TBAF (10 mL, 1M in THF) and AcOH (365 μL, 6.34 mmol). The mixture was stirred at rt for 2 h, when TLC showed completion of the reaction. The solvent was evaporated under reduced pressure, and the residue was purified by silica gel column chromatography with EtOAc and hexane (1:5)

as the eluent to give **9** (886 mg, 72% for two steps) as colorless syrup.  $^1\text{H}$  NMR (400 MHz,  $\text{CDCl}_3$ ):  $\delta$  7.44-7.26 (m, 7H, Ph), 7.12 (d,  $J = 8.0$  Hz, 2H, Ph), 5.47 (s, 1H, H-2), 5.29 (s, 1H, H-1), 4.78 (d,  $J = 12.0$  Hz, 1H, Bn), 4.59 (d,  $J = 12.0$  Hz, 1H, Bn), 4.45-4.39 (m, 1H, H-4), 3.99 (d,  $J = 5.6$  Hz, 1H, H-3), 3.86 (dt,  $J = 12.0, 3.6$  Hz, 1H, H-5), 3.64 (m, 1H, H-5'), 2.32 (s, 3H, Tol), 2.06 (s, 3H, Ac).  $^{13}\text{C}$  NMR (100 MHz,  $\text{CDCl}_3$ ):  $\delta$  169.79, 137.96, 137.48, 132.72, 130.22, 129.83, 128.51, 127.98, 127.88, 91.71, 83.09, 82.62, 81.89, 72.46, 61.52, 21.16, 20.95. HR ESI-TOF MS ( $m/z$ ): calcd for  $\text{C}_{21}\text{H}_{24}\text{O}_5\text{SNa}$   $[\text{M} + \text{Na}]^+$ , 411.1242; found, 411.1249. ESI MS ( $m/z$ ): found, 411.6.

***p*-Tolyl (2-*O*-acetyl-3,4-di-*O*-benzyl-6-*O*-*tert*-butydimethylsilyl- $\alpha$ -D-mannopyranosyl)-(1 $\rightarrow$ 6)-3,4-di-*O*-benzyl-2-*O*-acetyl- $\alpha$ -D-mannopyranoside (**15**):**

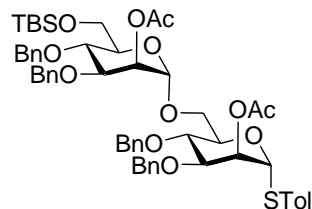

After a mixture of **10** (1.11 g, 1.78 mmol) and freshly activated molecular sieves  $4\text{\AA}$  in anhydrous  $\text{CH}_2\text{Cl}_2$  (20 mL) was stirred at rt for 40 min and then cooled to  $-78\text{ }^\circ\text{C}$ , a solution of  $\text{AgOTf}$  (1.38 g, 5.35 mmol) in acetonitrile (5 mL) was added. Ten minutes later, *p*-TolSCl (257  $\mu\text{L}$ , 1.78 mmol) was added dropwise. The mixture was stirred at  $-78\text{ }^\circ\text{C}$  for another 15 min, before a solution of **11** (828 mg, 1.63 mmol) and TTBP (404 mg, 1.63 mmol) in anhydrous  $\text{CH}_2\text{Cl}_2$  (5.0 mL) was added. The reaction mixture was warmed up to rt slowly in 1 h, stirred for another 20 min, quenched with  $\text{Et}_3\text{N}$ , diluted with  $\text{CH}_2\text{Cl}_2$ , filtered, and then concentrated *in vacuo*. The residue was purified by silica gel column chromatography with a

mixture of EtOAc and toluene (1:30) as the eluent to give **15** (1.39 g, 85%) as syrup.  $^1\text{H}$  NMR (600 MHz,  $\text{CDCl}_3$ ):  $\delta$  7.38-7.15 (m, 22H, Ph), 7.09 (d,  $J = 7.8$  Hz, 2H, Ph), 5.60 (s, 1H,  $\text{Man}^{\text{A}}$  H-2), 5.40 (s, 1H,  $\text{Man}^{\text{B}}$  H-2), 5.37 (s, 1H,  $\text{Man}^{\text{A}}$  H-1), 4.90 (dd,  $J = 10.8, 3.6$  Hz, 2H), 4.86 (s, 1H,  $\text{Man}^{\text{B}}$  H-1), 4.73-4.46 (m, 6H), 4.30 (m, 1H), 3.97 (dd,  $J = 9.6, 3.0$  Hz, 1H), 3.94-3.87 (m, 3H), 3.84-3.79 (m, 2H), 3.74 (d,  $J = 10.8$  Hz, 1H), 3.68 (d,  $J = 10.8$  Hz, 1H), 3.61 (dd,  $J = 9.6, 3.0$  Hz, 1H), 2.19 (s, 3H, Tol), 2.14 (s, 3H, Ac), 2.10 (s, 3H, Ac), 0.90 (s, 9H, *t*Bu), 0.06 (s, 3H, SiMe), 0.04 (s, 3H, SiMe).  $^{13}\text{C}$  NMR (150 MHz,  $\text{CDCl}_3$ ):  $\delta$  170.27, 170.16, 138.83, 138.23, 137.89, 137.84, 137.54, 131.97, 129.88, 128.44, 128.37, 128.34, 128.24, 128.19, 128.13, 127.88, 127.76, 127.69, 127.64, 127.63, 127.46, 97.84 ( $\text{Man}^{\text{B}}$  C-1,  $J_{\text{CH}} = 172$  Hz), 86.59 ( $\text{Man}^{\text{A}}$  C-1,  $J_{\text{CH}} = 169$  Hz), 78.52, 77.83, 75.13, 74.40, 74.09, 72.79, 72.17, 71.81, 71.67, 70.24, 68.58, 65.92, 62.08, 25.87, 20.98, 20.95, 18.24, -5.12, -5.39. HR ESI-TOF MS ( $m/z$ ): calcd for  $\text{C}_{57}\text{H}_{70}\text{O}_{12}\text{SiNa} [\text{M} + \text{Na}]^+$ , 1029.4255; found, 1029.4249.

***p*-Tolyl (2-*O*-acetyl-3,4-di-*O*-benzyl- $\alpha$ -D-mannopyranosyl)-(1 $\rightarrow$ 6)-3,4-di-*O*-benzyl-2-*O*-acetyl- $\alpha$ -D-mannopyranoside (**16**):**

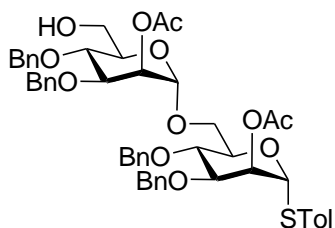

After the TBS-protected **15** (760 mg, 0.755 mmol) was dissolved in THF and  $\text{CH}_2\text{Cl}_2$  (16 mL, 1:1),  $\text{Et}_3\text{N}\cdot 3\text{HF}$  (740  $\mu\text{L}$ , 4.54 mmol) was added under Argon at rt, and the mixture was stirred at rt overnight. The reaction was quenched with saturated aq.  $\text{NaHCO}_3$ , and the water phase was extracted with  $\text{CH}_2\text{Cl}_2$  ( $2 \times 100$  mL). The organic layer was combined, dried over

Na<sub>2</sub>SO<sub>4</sub>, and then concentrated under reduced pressure. The residue was finally purified by silica gel column chromatography with EtOAc and toluene (1:10) as the eluent to afford **16** (600 mg, 89%) as foamy solid. <sup>1</sup>H NMR (600 MHz, CDCl<sub>3</sub>): δ 7.27-7.11 (m, 22H, Ph), 7.01 (d, *J* = 7.8 Hz, 2H, Ph), 5.53 (dd, *J* = 3.0, 1.8 Hz, 1H, Man<sup>A</sup> H-2), 5.36 (dd, *J* = 3.0, 1.8 Hz, 1H, Man<sup>B</sup> H-2), 5.30 (d, *J* = 1.2 Hz, 1H, Man<sup>A</sup> H-1), 4.84 (dd, *J* = 10.8, 8.4 Hz, 2H), 4.81 (d, *J* = 1.2 Hz, 1H, Man<sup>B</sup> H-1), 4.66-4.38 (m, 6H), 4.22 (m, 1H), 3.91-3.81 (m, 3H), 3.76-3.56 (m, 6H), 2.14 (s, 3H, Tol), 2.08 (s, 3H, Ac), 2.04 (s, 3H, Ac). <sup>13</sup>C NMR (150 MHz, CDCl<sub>3</sub>): δ 170.27, 170.00, 138.36, 138.18, 137.94, 137.74, 137.49, 132.06, 129.96, 129.91, 128.46, 128.40, 128.36, 128.33, 128.21, 128.10, 127.90, 127.76, 127.69, 127.66, 97.98 (Man<sup>B</sup> C-1), 86.61 (Man<sup>A</sup> C-1), 78.45, 77.75, 75.21, 75.14, 74.30, 74.11, 72.05, 71.94, 71.82, 71.61, 70.18, 68.36, 66.10, 62.05, 21.01, 20.99, 20.98. HR ESI-TOF MS (*m/z*): calcd for C<sub>51</sub>H<sub>56</sub>O<sub>12</sub>SNa [M + Na]<sup>+</sup>, 915.3390; found, 915.3350.

***p*-Tolyl (2-*O*-acetyl-3,4-di-*O*-benzyl-6-*O*-*tert*-butyldimethylsilyl- $\alpha$ -D-mannopyranosyl)-(1 $\rightarrow$ 6)-(2-*O*-acetyl-3,4-di-*O*-benzyl- $\alpha$ -D-mannopyranosyl)-(1 $\rightarrow$ 6)-(2-*O*-acetyl-3,4-di-*O*-benzyl- $\alpha$ -D-mannopyranosyl)-3,4-di-*O*-benzyl-2-*O*-acetyl- $\alpha$ -D-mannopyranoside (**17**):**

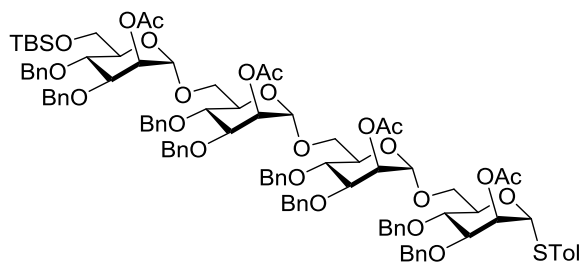

After a mixture of **15** (707 mg, 0.703 mmol) and freshly activated molecular sieves 4Å in anhydrous CH<sub>2</sub>Cl<sub>2</sub> (12 mL) was stirred at rt for 40 min and then cooled to -78 °C, a solution of AgOTf (542 mg, 2.108 mmol) in acetonitrile (4 mL) was added, followed by dropwise

addition of *p*-TolSCl (102  $\mu$ L, 0.703 mmol) 10 min later. The mixture was stirred at  $-78$   $^{\circ}$ C for another 15 min, before a solution of **16** (570 mg, 0.639 mmol) and TTBP (200 mg, 0.81 mmol) in anhydrous  $\text{CH}_2\text{Cl}_2$  (3.0 mL) was added. The reaction mixture was warmed up to rt slowly in 1 h, stirred for another 20 min, quenched with  $\text{Et}_3\text{N}$ , diluted with  $\text{CH}_2\text{Cl}_2$ , filtered, and then concentrated *in vacuo*. The residue was purified on silica gel column with a mixture of EtOAc and toluene (1:13) as the eluent to give **17** (930 mg, 82%) as foamy solid.  $^1\text{H}$  NMR (600 MHz,  $\text{CDCl}_3$ ):  $\delta$  7.35-7.12 (m, 42H, Ph), 7.09 (d,  $J = 8.0$  Hz, 2H, Ph), 5.61 (dd,  $J = 3.0$ , 1.8 Hz, 1H, Man<sup>A</sup> H-2), 5.46 (dd,  $J = 3.0$ , 1.8 Hz, 1H, Man H-2), 5.45 (dd,  $J = 3.0$ , 1.8 Hz, 1H, Man H-2), 5.43 (dd,  $J = 3.0$ , 1.8 Hz, 1H, Man H-2), 5.37 (s, 1H, Man<sup>A</sup> H-1), 4.92-4.83 (m, 7H, 3  $\times$  Man H-1, 4  $\times$  Bn- $\text{CH}_2$ -), 4.72 (d,  $J = 10.8$  Hz, 1H), 4.67 (d,  $J = 10.8$  Hz, 3H), 4.59 (d,  $J = 10.8$  Hz, 1H), 4.55 (d,  $J = 11.4$  Hz, 1H), 4.50-4.40 (m, 6H), 4.30 (dd,  $J = 9.6$ , 4.2 Hz, 1H), 3.97 (dd,  $J = 9.6$ , 3.0 Hz, 1H), 3.96-3.87 (m, 5H), 3.86-3.74 (m, 5H), 3.72-3.64 (m, 4H), 3.60 (d,  $J = 9.6$  Hz, 1H), 3.57-3.48 (m, 3H), 2.19 (s, 3H, Tol), 2.157 (s, 3H, Ac), 2.151 (s, 3H, Ac), 2.14 (s, 3H, Ac), 2.10 (s, 3H, Ac), 0.89 (s, 9H, *t*Bu), 0.06 (s, 3H, SiMe), 0.03 (s, 3H, SiMe).  $^{13}\text{C}$  NMR (150 MHz,  $\text{CDCl}_3$ ):  $\delta$  170.29, 170.25, 170.18, 170.12, 138.78, 138.48, 138.47, 138.18, 137.90, 137.82, 137.65, 137.62, 137.50, 132.01, 130.03, 129.92, 128.46, 128.44, 128.39, 128.37, 128.28, 128.26, 128.24, 128.21, 128.18, 127.92, 127.80, 127.76, 127.72, 127.68, 127.59, 127.47, 127.43, 127.39, 127.38, 97.99 (3  $\times$  Man C-1), 86.64 (Man<sup>A</sup> C-1), 78.52, 77.91, 77.67, 77.55, 75.13, 75.10, 75.00, 74.93, 74.32, 73.92, 73.78, 73.75, 72.68, 72.11, 71.83, 71.57, 71.48, 71.37, 71.19, 70.20, 68.47, 68.17, 68.05, 66.29, 65.49, 65.25, 61.88, 25.87, 21.01, 20.98, 18.23, -5.12, -5.38. HR ESI-TOF MS ( $m/z$ ): calcd for  $\text{C}_{101}\text{H}_{118}\text{O}_{24}\text{SSiNa}[\text{M} + \text{Na}]^+$ , 1797.7401; found, 1797.7299.



***p*-Tolyl (2-*O*-acetyl-3,4-di-*O*-benzyl- $\alpha$ -D-mannopyranosyl)-(1 $\rightarrow$ 6)-(2-*O*-acetyl-3,4-di-*O*-benzyl- $\alpha$ -D-mannopyranosyl)-(1 $\rightarrow$ 6)-(2-*O*-acetyl-3,4-di-*O*-benzyl- $\alpha$ -D-mannopyranosyl)-3,4-di-*O*-benzyl-2-*O*-acetyl- $\alpha$ -D-mannopyranoside (**7**):**

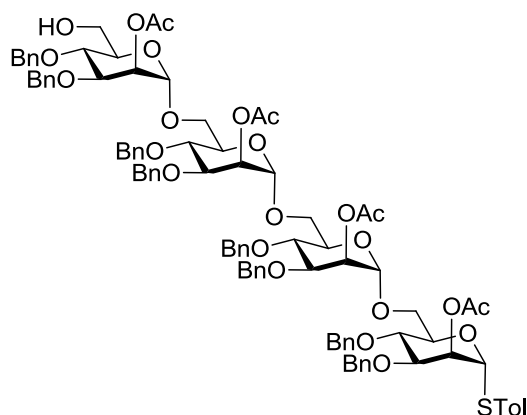

After the TBS-protected **17** (900 mg, 0.507 mmol) was dissolved in THF and CH<sub>2</sub>Cl<sub>2</sub> (16 mL, 1:1), Et<sub>3</sub>N·3HF (495  $\mu$ L, 3.04 mmol) was added under Argon at rt, and the mixture was stirred at rt overnight. The reaction was quenched with saturated aq. NaHCO<sub>3</sub>, and the water phase was extracted with CH<sub>2</sub>Cl<sub>2</sub> (2  $\times$  100 mL). The organic layer was combined, dried over Na<sub>2</sub>SO<sub>4</sub>, and then concentrated under reduced pressure. The residue was finally purified by silica gel column chromatography with EtOAc and toluene (1:5) as the eluent to afford **7** (724 mg, 86%) as foamy solid. <sup>1</sup>H NMR (600 MHz, CDCl<sub>3</sub>):  $\delta$  7.34-7.14 (m, 42H, Ph), 7.09 (d, *J* = 7.8 Hz, 2H, Ph), 5.61 (s, 1H, Man<sup>A</sup> H-2), 5.47 (s, 1H, Man H-2), 5.46 (s, 2H, 2  $\times$  Man H-2), 5.38 (s, 1H, Man<sup>A</sup> H-1), 4.93-4.86 (m, 7H, 3  $\times$  Man H-1, 4  $\times$  Bn-CH<sub>2</sub>-), 4.75-4.65 (m, 4H), 4.58-4.53 (m, 2H), 4.51-4.38 (m, 6H), 4.31 (dd, *J* = 9.6, 4.2 Hz, 1H), 3.98 (dd, *J* = 9.6, 3.0 Hz, 1H), 3.96-3.88 (m, 4H), 3.85-3.74 (m, 5H), 3.73-3.59 (m, 6H), 3.58-3.48 (m, 3H), 2.19 (s, 3H, Tol), 2.16 (s, 6H, 2  $\times$  Ac), 2.14 (s, 3H, Ac), 2.12 (s, 3H, Ac). <sup>13</sup>C NMR (150 MHz, CDCl<sub>3</sub>):  $\delta$  170.31, 170.25, 170.17, 169.98, 138.48, 138.39, 138.29, 138.18, 137.92, 137.64, 137.60,

137.56, 137.48, 132.01, 130.02, 129.93, 128.47, 128.46, 128.43, 128.38, 128.34, 128.32, 128.29, 128.25, 128.22, 128.17, 127.94, 127.91, 127.85, 127.80, 127.71, 127.68, 127.61, 127.48, 127.45, 127.31, 98.00 (2 × Man C-1), 97.96 (Man C-1), 86.64 (Man<sup>A</sup> C-1), 78.50, 77.91, 77.62, 77.47, 75.17, 75.14, 75.00, 74.97, 74.30, 73.98, 73.77, 73.71, 72.10, 71.86, 71.83, 71.57, 71.42, 71.39, 71.12, 70.19, 68.22, 68.15, 68.02, 66.29, 65.60, 65.26, 61.95, 21.04, 21.02, 20.99. HR ESI-TOF MS (*m/z*): calcd for C<sub>95</sub>H<sub>104</sub>O<sub>24</sub>SNa [M + Na]<sup>+</sup>, 1683.6536; found, 1683.6420.

***p*-Tolyl (2-*O*-acetyl-3,5-di-*O*-benzyl- $\alpha$ -D-arabinosyl)-(1→5)-(2-*O*-acetyl-3-*O*-benzyl- $\alpha$ -D-arabinosyl)-(1→5)-(2-*O*-acetyl-3-*O*-benzyl- $\alpha$ -D-arabinosyl)-(1→6)-(2-*O*-acetyl-3,4-di-*O*-benzyl- $\alpha$ -D-mannopyranosyl)-(1→6)-(2-*O*-acetyl-3,4-di-*O*-benzyl- $\alpha$ -D-mannopyranosyl)-(1→6)-(2-*O*-acetyl-3,4-di-*O*-benzyl- $\alpha$ -D-mannopyranosyl)-3,4-di-*O*-benzyl-2-*O*-acetyl- $\alpha$ -D-mannopyranoside (5):**

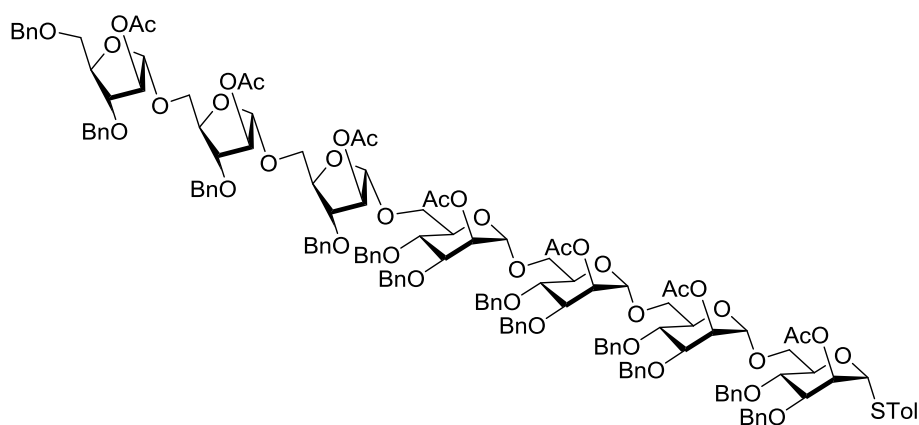

After a mixture of **8** (270 mg, 0.565 mmol) and freshly activated molecular sieves 4Å in anhydrous CH<sub>2</sub>Cl<sub>2</sub> (8 mL) was stirred at rt for 40 min and then cooled to -78 °C, a solution of AgOTf (436 mg, 1.695 mmol) in acetonitrile (2.5 mL) was added. Ten minutes later, *p*-TolSCl (82 μL, 0.565 mmol) was added dropwise. The mixture was stirred at -78 °C for

another 15 min, before a solution of **9** (199 mg, 0.514 mmol) and TTBP (127 mg, 0.514 mmol) in anhydrous CH<sub>2</sub>Cl<sub>2</sub> (2.0 mL) was added. The reaction mixture was warmed up to rt slowly in 1 h, stirred for another 20 min, and then cooled to -78 °C again. This was followed by another glycosylation by the same protocol using AgOTf (396 mg, 1.542 mmol) in acetonitrile (2.0 mL), *p*-TolSCl (74 μL, 0.514 mmol), **9** (181 mg, 0.467 mmol) and TTBP (116 mg, 0.467 mmol) in anhydrous CH<sub>2</sub>Cl<sub>2</sub> (2.0 mL). Thereafter, another glycosylation was achieved with **7** (705 mg, 0.425 mmol) as the glycosyl donor following the same protocol using AgOTf (360 mg, 1.401 mmol) in acetonitrile (2.0 mL), *p*-TolSCl (68 μL, 0.467 mmol), and **7** and TTBP (105 mg, 0.425 mmol) in anhydrous CH<sub>2</sub>Cl<sub>2</sub> (3.5 mL). Finally, the reaction was quenched with Et<sub>3</sub>N, diluted with CH<sub>2</sub>Cl<sub>2</sub>, filtered, and concentrated *in vacuum*. The residue was purified by silica gel column chromatography with EtOAc and toluene (1:5) as the eluent to give **5** (443 mg, 41% overall) as a foamy solid. <sup>1</sup>H NMR (600 MHz, CDCl<sub>3</sub>): δ 7.34-7.15 (m, 62H, Ph), 7.08 (d, *J* = 8.0 Hz, 2H, Ph), 5.60 (s, 1H, Man<sup>A</sup> H-2), 5.45 (m, 3H, 3 × Man H-2), 5.37 (s, 1H, Man<sup>A</sup> H-1), 5.22 (s, 1H, Ara<sup>A</sup> H-2), 5.15 (s, 1H, Ara<sup>A</sup> H-1), 5.10 (s, 1H, Ara H-2), 5.08 (s, 1H, Ara H-2), 5.05 (s, 1H, Ara H-1), 5.02 (s, 1H, Ara H-1), 4.96 (s, 1H, Man<sup>B</sup> H-1), 4.94-4.82 (m, 5H, 2 × Man H-1, 3 × Bn-CH<sub>2</sub>-), 4.77-4.62 (m, 8H), 4.60-4.36 (m, 13H), 4.30 (dd, *J* = 9.6, 3.6 Hz, 1H), 4.12 (dd, *J* = 9.0, 4.8 Hz, 1H), 4.06 (dd, *J* = 9.0, 4.8 Hz, 1H), 4.01 (dd, *J* = 9.0, 4.8 Hz, 1H), 3.99-3.88 (m, 8H), 3.85-3.44 (m, 20H), 2.18 (s, 3H, Tol), 2.14 (s, 6H, 2 × Ac), 2.13 (s, 3H, Ac), 2.03 (s, 3H, Ac), 1.97 (s, 3H, Ac), 1.96 (s, 6H, 2 × Ac). <sup>13</sup>C NMR (150 MHz, CDCl<sub>3</sub>): δ 170.34, 170.30, 170.27, 170.23, 169.82, 169.78, 169.74, 138.79, 138.44, 138.37, 138.14, 137.92, 137.89, 137.86, 137.81, 137.76, 137.65, 137.62, 137.59, 137.48, 132.01, 129.99, 129.92, 128.46, 128.44, 128.38, 128.31, 128.30, 128.28,

128.23, 128.19, 127.92, 127.82, 127.73, 127.69, 127.67, 127.63, 127.59, 127.51, 127.45, 127.41, 127.33, 106.19 (Ara<sup>A</sup> C-1), 106.03 (2 × Ara C-1), 98.14 (Man<sup>B</sup> C-1), 97.98 (Man C-1), 97.96 (Man C-1), 86.62 (Man<sup>A</sup> C-1), 83.40, 83.31, 82.65, 82.25, 81.95, 81.55, 81.45, 80.96, 78.50, 77.89, 77.63, 77.59, 75.14, 74.99, 74.30, 73.83, 73.77, 73.68, 73.43, 72.22, 72.11, 71.83, 71.56, 71.44, 71.37, 71.15, 71.10, 70.19, 69.16, 68.23, 68.16, 68.04, 66.28, 65.58, 65.49, 65.38, 65.34, 65.25, 21.02, 20.98, 20.84, 20.80. HR ESI-TOF MS (m/z): calcd for C<sub>144</sub>H<sub>158</sub>O<sub>39</sub>SNa [M + Na]<sup>+</sup>, 2565.9999; found, 2566.0120.

**6-*O*-[(2-*O*-Acetyl-3,5-di-*O*-benzyl- $\alpha$ -D-arabinosyl)-(1 $\rightarrow$ 5)-(2-*O*-acetyl-3-*O*-benzyl- $\alpha$ -D-arabinosyl)-(1 $\rightarrow$ 5)-(2-*O*-acetyl-3-*O*-benzyl- $\alpha$ -D-arabinosyl)-(1 $\rightarrow$ 6)-(2-*O*-acetyl-3,4-di-*O*-benzyl- $\alpha$ -D-mannopyranosyl)-(1 $\rightarrow$ 6)-(2-*O*-acetyl-3,4-di-*O*-benzyl- $\alpha$ -D-mannopyranosyl)-(1 $\rightarrow$ 6)-(2-*O*-acetyl-3,4-di-*O*-benzyl- $\alpha$ -D-mannopyranosyl)-(1 $\rightarrow$ 6)-(2-*O*-acetyl-3,4-di-*O*-benzyl- $\alpha$ -D-mannopyranosyl)]-2-*O*-(2-*O*-acetyl-3,4-di-*O*-benzyl-6-*O*-*tert*-butyldimethylsilyl- $\alpha$ -D-mannopyranosyl)-3,4,5-tri-*O*-benzyl-1-*O*-(*para*-methoxybenzyl)-D-*myo*-inositol (3):**

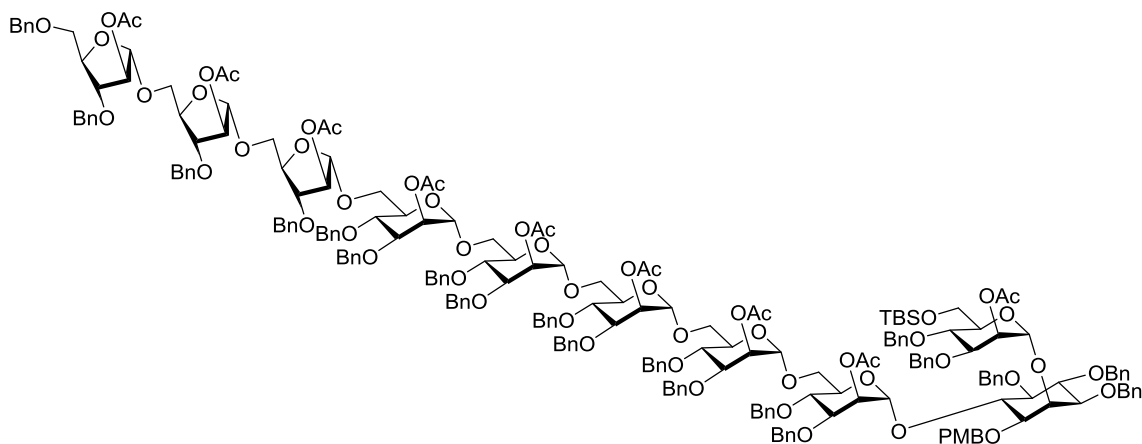

To a solution of **5** (300 mg, 0.118 mmol) in 10 mL of CH<sub>2</sub>Cl<sub>2</sub> were added TTBP (88 mg, 0.354 mmol), NIS (53 mg, 0.236 mmol), and AgOTf (61 mg, 0.236 mmol) at 0 °C. The

reaction was stirred at rt for 2 h and quenched with saturated aq.  $\text{Na}_2\text{S}_2\text{O}_3$  at 0 °C. The mixture was diluted with saturated aq. NaCl and extracted with  $\text{CH}_2\text{Cl}_2$  (2×70 mL). The organic layer was combined, dried over  $\text{Na}_2\text{SO}_4$ , and then condensed under reduced pressure. The mixture was purified by silica gel column chromatography with EtOAc and toluene (1:6) as the eluent to produce a foamy solid. To a solution of this product in 10 mL of anhydrous  $\text{CH}_2\text{Cl}_2$  were added DBU (8.8  $\mu\text{L}$ , 59  $\mu\text{mol}$ ) and  $\text{CCl}_3\text{CN}$  (59  $\mu\text{L}$ , 0.59 mmol) at 0 °C. The reaction mixture was stirred for 1 h, and concentrated *in vacuo* to afford a residue, which was purified on a  $\text{Et}_3\text{N}$ -neutralized silica gel column with EtOAc and toluene (1:10) as the eluent to produce **18** (228 mg, 75% for two steps) as a foamy solid, which was directly used in the next step without further purification. To the stirred mixture of **18** (199 mg, 77  $\mu\text{mol}$ ), **6** (80 mg, 55  $\mu\text{mol}$ ), and molecular sieves 4Å in anhydrous  $\text{CH}_2\text{Cl}_2$  (5 mL) was added TMSOTf (1.4  $\mu\text{L}$ , 7.7  $\mu\text{mol}$ ) under an  $\text{N}_2$  atmosphere at 0 °C. The mixture was stirred for another 30 min, before TLC indicated the completion of the reaction. The mixture was neutralized with  $\text{Et}_3\text{N}$ , filtered, and concentrated. The residue was subjected to silica column chromatography with EtOAc and toluene (1:6) as the eluent to afford **3** as colorless syrup (168 mg, 79%).  $^1\text{H}$  NMR (600 MHz,  $\text{CDCl}_3$ ):  $\delta$  7.42-7.09 (m, 91H, Ph), 7.08-7.04 (m, 4H, Ph), 7.01 (d,  $J = 6.6$  Hz, 2H, Ph), 6.86 (d,  $J = 8.4$  Hz, 2H, Ph), 5.54 (s, 1H,  $\text{Man}^{\text{A}}$  H-2), 5.52 (s, 3H, 3 × Man H-2), 5.49 (s, 1H, Man H-2), 5.43 (s, 1H,  $\text{Man}^{\text{B}}$  H-2), 5.40 (s, 1H,  $\text{Man}^{\text{A}}$  H-1), 5.25 (s, 1H,  $\text{Ara}^{\text{A}}$  H-2), 5.17 (s, 1H,  $\text{Ara}^{\text{A}}$  H-1), 5.16 (s, 1H,  $\text{Man}^{\text{B}}$  H-1), 5.12 (s, 1H, Ara H-2), 5.10 (s, 1H, Ara H-2), 5.07 (s, 1H, Ara H-1), 5.05-5.02 (m, 2H, Ara H-1, 1 × Bn- $\text{CH}_2$ -), 4.95-4.24 (m, 43H, 4 × Man H-1, 39 × Bn- $\text{CH}_2$ -), 4.15-4.11 (m, 1H), 4.09-4.05 (m, 1H), 4.04-3.69 (m, 27H), 3.61-3.38 (m, 14H), 3.34 -3.23 (m, 6H), 3.20-3.12 (m, 2H), 2.15 (s, 3H, Ac), 2.14 (s, 3H, Ac),

2.12 (s, 6H, 2 × Ac), 2.07 (s, 3H, Ac), 2.02 (s, 3H, Ac), 1.98 (s, 3H, Ac), 1.973 (s, 3H, Ac), 1.970 (s, 3H, Ac), 0.90 (s, 9H, *t*Bu), 0.05 (s, 3H, SiMe), 0.01 (s, 3H, SiMe). <sup>13</sup>C NMR (150 MHz, CDCl<sub>3</sub>): δ 170.22, 170.20, 170.18, 170.07, 169.91, 169.80, 169.72, 169.71, 169.70, 159.41, 139.04, 138.90, 138.88, 138.61, 138.52, 138.44, 138.27, 138.07, 138.02, 137.93, 137.88, 137.86, 137.77, 137.70, 137.56, 137.52, 130.05, 129.10, 129.02, 128.67, 128.52, 128.51, 128.47, 128.45, 128.40, 128.37, 128.33, 128.31, 128.28, 128.24, 128.21, 128.17, 128.11, 128.05, 127.96, 127.84, 127.79, 127.73, 127.70, 127.67, 127.63, 127.56, 127.48, 127.38, 127.35, 127.33, 127.30, 127.27, 127.16, 127.09, 126.95, 126.64, 125.28, 113.84, 106.22 (Ara<sup>A</sup> C-1), 106.04 (2 × Ara C-1), 98.66 (Man<sup>A</sup> C-1), 98.30 (Man<sup>B</sup> C-1), 98.26 (Man C-1), 98.21 (Man C-1), 98.16 (Man C-1), 97.96 (Man C-1), 83.44, 83.34, 82.76, 82.29, 81.99, 81.58, 81.45, 81.32, 80.91, 80.59, 78.81, 78.79, 77.81, 77.75, 77.68, 77.62, 76.44, 75.71, 75.06, 74.97, 74.93, 74.75, 74.59, 74.40, 73.85, 73.77, 73.58, 73.52, 73.44, 73.27, 72.59, 72.22, 72.11, 72.07, 71.70, 71.66, 71.52, 71.41, 71.32, 71.28, 71.19, 71.10, 71.04, 70.81, 70.55, 70.51, 69.94, 69.18, 68.66, 68.20, 68.18, 67.94, 67.85, 67.76, 65.57, 65.44, 65.33, 65.22, 61.90, 60.03, 55.19, 25.90, 21.14, 21.05, 21.02, 20.97, 20.86, 20.82, 18.28, -5.09, -5.33. HR ESI-TOF MS (*m/z*): calcd for C<sub>222</sub>H<sub>250</sub>O<sub>58</sub>SiNa<sub>2</sub> [M + 2Na]<sup>2+</sup>, 1958.8089; found, 1958.8101.

**3,4,5-tri-*O*-Benzyl-6-*O*-[(2,3,5-tri-*O*-benzyl- $\alpha$ -D-arabinosyl)-(1→5)-(2,3-di-*O*-benzyl- $\alpha$ -D-arabinosyl)-(1→5)-(2,3-di-*O*-benzyl- $\alpha$ -D-arabinosyl)-(1→6)-(2,3,4-tri-*O*-benzyl- $\alpha$ -D-mannopyranosyl)-(1→6)-(2,3,4-tri-*O*-benzyl- $\alpha$ -D-mannopyranosyl)-(1→6)-(2,3,4-tri-*O*-benzyl- $\alpha$ -D-mannopyranosyl)-(1→6)-(2,3,4-tri-*O*-benzyl- $\alpha$ -D-mannopyranosyl)-(1→6)-(2,3,**

**4-tri-*O*-benzyl- $\alpha$ -D-mannopyranosyl]-2-*O*-(2,3,4-tri-*O*-benzyl-6-*O*-*tert*-butyldimethylsilyl**

**yl- $\alpha$ -D-mannopyranosyl)-1-*O*-(*para*-methoxybenzyl)-D-*myo*-inositol (**19**):**

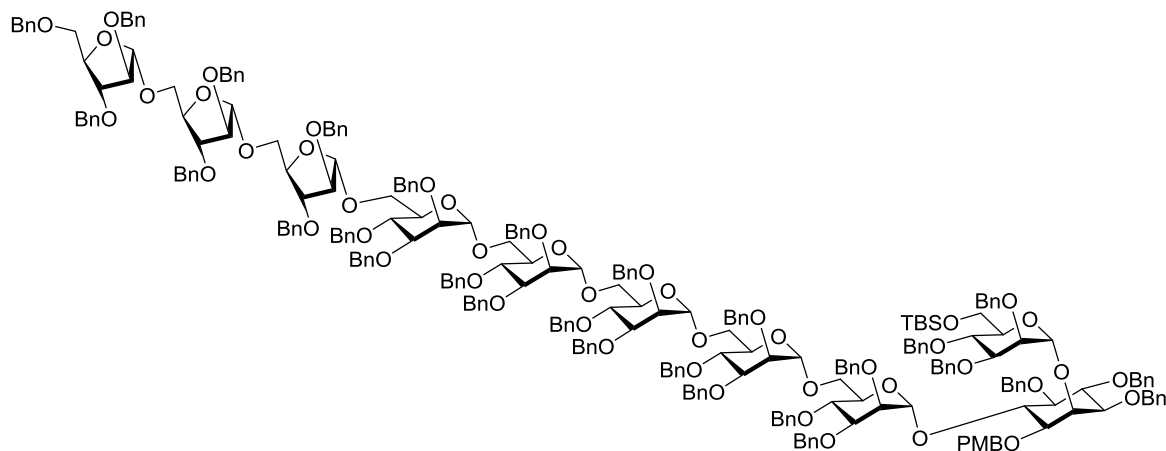

To a solution of **3** (95 mg, 24.5  $\mu$ mol) in 15 mL of CH<sub>3</sub>OH and CH<sub>2</sub>Cl<sub>2</sub> (1:2) was added a CH<sub>3</sub>ONa solution in CH<sub>3</sub>OH (0.5 M) until the pH reached 11. The reaction mixture was stirred at 35 °C for 36 h, and the solvent was removed *in vacuo*. The residue was dissolved in a mixture of CH<sub>2</sub>Cl<sub>2</sub> and CH<sub>3</sub>OH (1:10) and filtered. The filtrate was concentrated *in vacuo* to afford an intermediate that was directly applied to the next reaction. To a solution of this intermediate in anhydrous DMF was added BnBr (58  $\mu$ L, 0.49 mmol) and TBAI (4.1 mg, 11.0  $\mu$ mol). Ten minutes later, NaH was added (6.9 mg, 0.287 mmol) at 0 °C, and the mixture was stirred at 0 °C for 1.5 h, before TLC showed the completion of reaction. MeOH was then slowly added to quench the reaction before water was added. The aqueous phase was extracted with CH<sub>2</sub>Cl<sub>2</sub> (3 $\times$ 50 mL), and the organic layer was dried over Na<sub>2</sub>SO<sub>4</sub> and concentrated. The residue was purified by silica gel column chromatography with EtOAc and toluene (1:14) as the eluent to give **19** (80 mg, 76% for two steps) as colorless syrup. <sup>1</sup>H NMR (600 MHz, CDCl<sub>3</sub>):  $\delta$  7.41-7.04 (m, 142H, Ph), 6.61 (d, *J* = 8.4 Hz, 2H, Ph), 5.42 (s, 1H, Man<sup>A</sup> H-1), 5.32 (s, 1H, Man<sup>B</sup> H-1), 5.23 (s, 1H, Ara<sup>A</sup> H-1), 5.16 (s, 1H, Ara H-1), 5.10 (s, 1H, Ara H-1), 5.07-5.04 (m, 2H, Man H-1, 1  $\times$  Bn-CH<sub>2</sub>-), 5.02 (s, 1H, Man H-1), 4.98 (s,

1H, Man H-1), 4.97-4.30 (m, 58H, Man<sup>C</sup> H-1, 57 × Bn-CH<sub>2</sub>-), 4.23-4.17 (m, 1H), 4.16-3.29 (m, 57H), 3.23 (d, *J* = 11.4 Hz, 1H), 3.14 (d, *J* = 10.8 Hz, 1H), 0.88 (s, 9H, *t*Bu), 0.03 (s, 3H, SiMe), 0.02 (s, 3H, SiMe). <sup>13</sup>C NMR (150 MHz, CDCl<sub>3</sub>): δ 159.44, 139.16, 139.01, 138.84, 138.80, 138.78, 138.72, 138.71, 138.60, 138.54, 138.48, 138.33, 138.26, 138.15, 138.13, 138.10, 138.06, 137.96, 137.94, 137.86, 137.71, 137.65, 129.48, 129.06, 128.48, 128.35, 128.32, 128.29, 128.27, 128.25, 128.24, 128.16, 128.14, 128.11, 128.08, 128.03, 127.99, 127.93, 127.88, 127.79, 127.77, 127.75, 127.73, 127.70, 127.67, 127.65, 127.63, 127.59, 127.58, 127.52, 127.50, 127.45, 127.42, 127.41, 127.34, 127.26, 127.21, 127.13, 127.06, 126.85, 113.92, 106.78 (Ara<sup>A</sup> C-1), 106.48 (Ara C-1), 106.45 (Ara C-1), 99.10 (Man<sup>A</sup> C-1), 98.75 (Man<sup>B</sup> C-1), 98.60 (Man C-1), 98.50 (Man C-1), 98.32 (Man C-1), 98.13 (Man<sup>C</sup> C-1), 88.40, 88.10, 88.08, 83.57, 83.26, 83.19, 82.06, 81.44, 81.40, 80.69, 80.64, 80.47, 80.29, 79.61, 79.41, 79.34, 79.30, 79.15, 79.04, 76.08, 75.96, 75.75, 75.70, 75.17, 75.04, 74.99, 74.94, 74.85, 74.80, 74.70, 74.59, 74.55, 74.43, 74.26, 74.04, 73.90, 73.73, 73.35, 72.88, 72.67, 72.61, 72.58, 72.55, 72.51, 72.43, 72.32, 72.25, 72.17, 72.15, 72.05, 72.01, 71.91, 71.87, 71.70, 71.56, 71.50, 71.40, 71.35, 71.25, 71.22, 71.07, 69.67, 69.07, 66.03, 65.90, 65.84, 65.78, 65.63, 62.25, 60.03, 55.05, 25.96, 18.33, -5.11, -5.33. ESI-TOF MS (*m/z*): calcd for C<sub>267</sub>H<sub>286</sub>O<sub>49</sub>SiNa<sub>2</sub> [M + 2Na]<sup>2+</sup>, 2174.9; found, 2174.4. MALDI-TOF MS (*m/z*): calcd for C<sub>267</sub>H<sub>286</sub>O<sub>49</sub>SiNa [M + Na]<sup>+</sup> 4330.1; found, 4329.5.

**3,4,5-tri-*O*-Benzyl-6-*O*-[(2,3,5-tri-*O*-benzyl- $\alpha$ -D-arabinosyl)-(1→5)-(2,3-di-*O*-benzyl- $\alpha$ -D-arabinosyl)-(1→5)-(2,3-di-*O*-benzyl- $\alpha$ -D-arabinosyl)-(1→6)-(2,3,4-tri-*O*-benzyl- $\alpha$ -D-mannopyranosyl)-(1→6)-(2,3,4-tri-*O*-ben**



**zyl- $\alpha$ -D-mannopyranosyl)-(1 $\rightarrow$ 6)-(2,3,4-tri-*O*-benzyl- $\alpha$ -D-mannopyranosyl)-(1 $\rightarrow$ 6)-(2,3,4-tri-*O*-benzyl- $\alpha$ -D-mannopyranosyl)]-2-*O*-(2,3,4-tri-*O*-benzyl- $\alpha$ -D-mannopyranosyl)-1-*O*-(*para*-methoxybenzyl)-D-*myo*-inositol (**20**):**

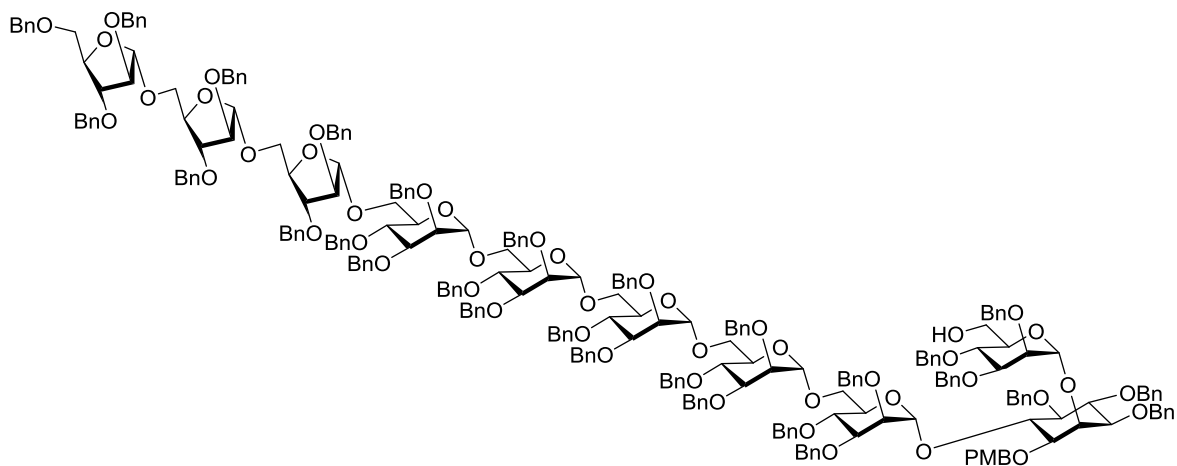

After the TBS-protected **19** (65.0 mg, 15.1  $\mu$ mol) was dissolved in THF and  $\text{CH}_2\text{Cl}_2$  (2 mL, 1:1),  $\text{Et}_3\text{N}\cdot 3\text{HF}$  (49  $\mu$ L, 0.30 mmol) was added under Argon at rt, and the mixture was stirred at rt overnight. The reaction was quenched with saturated aq.  $\text{NaHCO}_3$ , and the water phase was extracted with  $\text{CH}_2\text{Cl}_2$  (2  $\times$  40 mL). The organic layer was combined, dried over  $\text{Na}_2\text{SO}_4$ , and then concentrated under reduced pressure. The residue was finally purified by silica gel column chromatography with EtOAc and toluene (1:5) as the eluent to afford **20** (57.6 mg, 91%) as colorless syrup.  $^1\text{H}$  NMR (600 MHz,  $\text{CDCl}_3$ ):  $\delta$  7.41-7.04 (m, 142H, Ph), 6.66 (d,  $J = 9.0$  Hz, 2H, Ph), 5.44 (s, 1H,  $\text{Man}^{\text{A}}$  H-1), 5.23 (s, 2H,  $\text{Man}^{\text{B}}$  H-1,  $\text{Ara}^{\text{A}}$  H-1), 5.15 (s, 1H, Ara H-1), 5.09 (s, 1H, Ara H-1), 5.07-5.04 (m, 2H, 2  $\times$  Man H-1), 5.02 (s, 1H, Man H-1), 5.00-4.28 (m, 59H,  $\text{Man}^{\text{C}}$  H-1), 4.20-4.18 (dd,  $J = 10.3, 5.3$  Hz, 1H), 4.13-4.09 (m, 4H), 4.08-3.90 (m, 20H), 3.88-3.80 (m, 10H), 3.70-3.52 (m, 14H), 3.48 (d,  $J = 9.0$  Hz, 1H), 3.44-3.40 (t,  $J = 10.4$  Hz, 2H), 3.38-3.27 (m, 6H), 3.22 (d,  $J = 11.4$  Hz, 1H), 3.15 (d,  $J = 11.4$  Hz, 1H).  $^{13}\text{C}$  NMR (150 MHz,  $\text{CDCl}_3$ ):  $\delta$  159.48, 138.99, 138.98, 138.82, 138.79, 138.73,

138.67, 138.59, 138.54, 138.48, 138.46, 138.38, 138.25, 138.15, 138.11, 138.06, 137.96, 137.86, 137.71, 137.65, 129.20, 129.02, 129.00, 128.56, 128.41, 128.37, 128.35, 128.31, 128.29, 128.27, 128.23, 128.16, 128.14, 128.10, 128.08, 128.03, 128.01, 127.97, 127.92, 127.88, 127.79, 127.77, 127.75, 127.73, 127.70, 127.67, 127.66, 127.65, 127.59, 127.52, 127.49, 127.46, 127.44, 127.40, 127.32, 127.26, 127.20, 127.15, 127.12, 127.06, 126.84, 113.98, 106.78 (Ara<sup>A</sup> C-1), 106.48 (Ara C-1), 106.45 (Ara C-1), 99.12 (Man<sup>A</sup> C-1), 99.01 (Man<sup>B</sup> C-1), 98.74 (Man C-1), 98.60 (Man C-1), 98.50 (Man C-1), 98.32 (Man<sup>C</sup> C-1), 88.40, 88.08, 83.57, 83.26, 83.19, 81.78, 81.38, 81.34, 80.68, 80.47, 80.29, 79.63, 79.42, 79.34, 79.31, 79.05, 78.69, 77.23, 77.02, 76.81, 75.98, 75.81, 75.71, 75.17, 75.05, 75.00, 74.93, 74.87, 74.80, 74.70, 74.59, 74.55, 74.43, 74.26, 74.04, 73.90, 73.74, 73.35, 72.84, 72.67, 72.61, 72.58, 72.56, 72.50, 72.47, 72.28, 72.24, 72.14, 72.12, 72.04, 71.91, 71.87, 71.70, 71.56, 71.51, 71.41, 71.35, 71.28, 71.23, 71.09, 70.86, 69.67, 66.02, 65.83, 65.78, 65.63, 62.13, 60.03, 55.09. ESI-TOF MS (*m/z*): calcd for C<sub>261</sub>H<sub>272</sub>O<sub>49</sub>Na<sub>2</sub> [M + 2Na]<sup>2+</sup>, 2117.9; found, 2117.2. MALDI-TOF MS (*m/z*): calcd for C<sub>261</sub>H<sub>272</sub>O<sub>49</sub>Na [M + Na]<sup>+</sup>, 4215.9; found, 4214.6.

**3,4,5-tri-*O*-Benzyl-6-*O*-[(2,3,5-tri-*O*-benzyl- $\alpha$ -D-arabinosyl)-(1 $\rightarrow$ 5)-(2,3-di-*O*-benzyl- $\alpha$ -D-arabinosyl)-(1 $\rightarrow$ 5)-(2,3-di-*O*-benzyl- $\alpha$ -D-arabinosyl)-(1 $\rightarrow$ 6)-(2,3,4-tri-*O*-benzyl- $\alpha$ -D-mannopyranosyl)-(1 $\rightarrow$ 6)-(2,3,4-tri-*O*-benzyl- $\alpha$ -D-mannopyranosyl)-(1 $\rightarrow$ 6)-(2,3,4-tri-*O*-benzyl- $\alpha$ -D-mannopyranosyl)-(1 $\rightarrow$ 6)-(2,3,4-tri-*O*-benzyl- $\alpha$ -D-mannopyranosyl)]-2-*O*-(2,3,4-tri-*O*-benzyl-6-*O*-stearoyl- $\alpha$ -D-mannopyranosyl)-D-*myo*-inositol (22):**

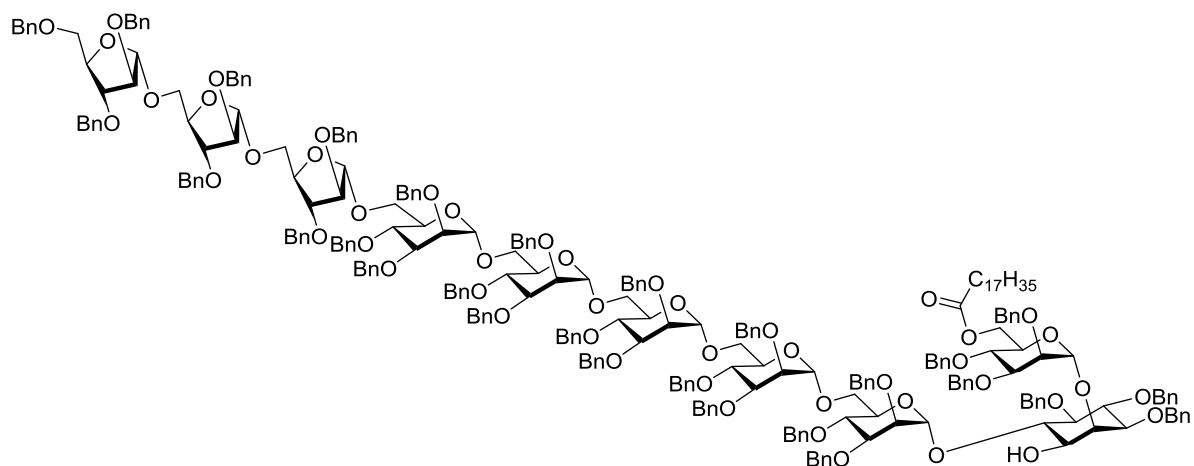

After a solution of **20** (50 mg, 12.0  $\mu\text{mol}$ ), stearic acid (17.0 mg, 60.0  $\mu\text{mol}$ ), DCC (12.4 mg, 60.0  $\mu\text{mol}$ ) and DMAP (1.5 mg, 12.0 mmol) in anhydrous  $\text{CH}_2\text{Cl}_2$  (7 mL) was stirred at rt overnight, it was filtered off, and the filtrate was condensed *in vacuo*. The residue was briefly purified by silica gel column chromatography with EtOAc and toluene: (1:15) as the eluent of to give **21** (47.6 mg, 89%) as a foamy solid, which was directly subjected to the next step of reaction. Compound **21** (40 mg, 8.9  $\mu\text{mol}$ ) was dissolved in 4 mL of 2% TFA in  $\text{CH}_2\text{Cl}_2$ , and the solution was stirred for about 6 h with TLC detection once every 2 h. The solution was then co-evaporated with toluene for 3 times to remove TFA thoroughly. The residue was purified by silica gel column chromatography with EtOAc and toluene (1:12) as the eluent to give **22** (21 mg, 54%) as a foamy solid, as well as recovered **21** (11.6 mg). **22**:  $^1\text{H}$  NMR (600 MHz,  $\text{CDCl}_3$ ):  $\delta$  7.31-7.08 (m, 140H, Ph), 52.42 (s, 1H, Man<sup>A</sup> H-1), 5.19 (s, 1H, Ara<sup>A</sup> H-1), 5.15 (s, 1H, Man<sup>B</sup> H-1), 5.12 (s, 1H, Ara H-1), 5.06 (s, 1H, Ara H-1), 5.03-5.00 (3  $\times$  s, 3H, 3  $\times$  Man H-1), 4.85-4.80 (m, 8H, Man<sup>C</sup> H-1, 7  $\times$  Bn), 4.71 (d,  $J = 10.8$  Hz, 1H), 4.66-4.32 (m, 48H), 4.22 (s, 1H), 4.17-3.40 (m, 54H), 3.28 (d,  $J = 9.6$  Hz, 1H), 3.17 (t,  $J = 9.0$  Hz, 1H), 2.16 (t,  $J = 7.8$  Hz, 2H), 1.52-1.45 (m, 2H), 1.28-1.18 (m, 28H), 0.87 (t,  $J = 7.2$  Hz, 3H).  $^{13}\text{C}$  NMR (150 MHz,  $\text{CDCl}_3$ ):  $\delta$  173.62, 138.92, 138.72, 138.66, 138.52, 138.43, 138.36, 138.32,

138.26, 138.22, 138.12, 138.05, 138.00, 137.91, 137.81, 137.66, 137.60, 135.48, 129.56, 128.58, 128.48, 128.46, 128.39, 128.33, 128.29, 128.25, 128.22, 128.17, 128.15, 128.12, 128.08, 127.98, 127.89, 127.82, 127.76, 127.71, 127.65, 127.64, 127.58, 127.56, 127.51, 127.48, 127.46, 127.42, 127.41, 127.40, 127.36, 127.34, 127.30, 127.29, 127.27, 127.21, 127.10, 106.74 (Ara<sup>A</sup> C-1), 106.44 (Ara C-1), 106.42 (Ara C-1), 98.57 (Man<sup>A</sup> C-1, Man<sup>B</sup> C-1), 98.54 (3 × Man C-1), 98.40 (Man<sup>C</sup> C-1), 88.35, 88.02, 83.50, 83.20, 83.13, 81.21, 80.65, 80.44, 80.26, 79.38, 79.29, 78.74, 78.26, 75.53, 75.32, 75.15, 75.12, 75.06, 74.99, 74.92, 74.88, 74.80, 74.71, 74.51, 74.39, 74.28, 74.13, 74.04, 74.00, 73.92, 73.33, 73.00, 72.65, 72.55, 72.47, 72.30, 72.22, 72.12, 72.02, 71.96, 71.88, 71.84, 71.66, 71.57, 71.34, 71.24, 71.15, 70.11, 69.62, 66.50, 65.97, 65.84, 65.82, 65.76, 65.73, 63.04, 34.11, 31.90, 29.68, 29.65, 29.48, 29.34, 29.24, 29.18, 29.05, 24.80, 22.67, 14.10. ESI-TOF MS (*m/z*): calcd for C<sub>271</sub>H<sub>298</sub>O<sub>49</sub>Na<sub>2</sub> [M + 2Na]<sup>2+</sup>, 2191.0; found, 2190.9. MALDI-TOF MS (*m/z*): calcd for C<sub>271</sub>H<sub>298</sub>O<sub>49</sub>Na [M + Na]<sup>+</sup>, 4362.2; found, 4362.3.

**3,4,5-tri-*O*-Benzyl-6-*O*-[(2,3,5-tri-*O*-benzyl- $\alpha$ -D-arabinosyl)-(1→5)-(2,3-di-*O*-benzyl- $\alpha$ -D-arabinosyl)-(1→5)-(2,3-di-*O*-benzyl- $\alpha$ -D-arabinosyl)-(1→6)-(2,3,4-tri-*O*-benzyl- $\alpha$ -D-mannopyranosyl)-(1→6)-(2,3,4-tri-*O*-benzyl- $\alpha$ -D-mannopyranosyl)-(1→6)-(2,3,4-tri-*O*-benzyl- $\alpha$ -D-mannopyranosyl)-(1→6)-(2,3,4-tri-*O*-benzyl- $\alpha$ -D-mannopyranosyl)-(1→6)-(2,3,4-tri-*O*-benzyl- $\alpha$ -D-mannopyranosyl)]-2-*O*-(2,3,4-tri-*O*-benzyl-6-*O*-stearoyl- $\alpha$ -D-mannopyranosyl)-1-*O*-(1,2-di-*O*-stearoyl-*sn*-glycero-3-benzylphosphoryl)-D-*myo*-inositol (2):**

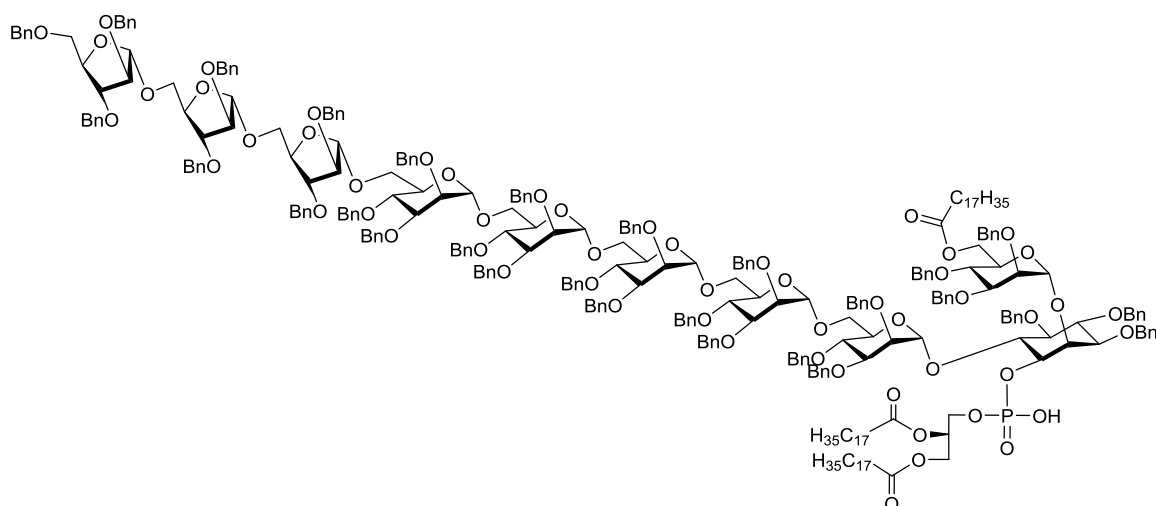

A mixture of **22** (14 mg, 3.2  $\mu\text{mol}$ ), freshly prepared glycerylphosphoramidite **4** (13.8 mg, 16.0  $\mu\text{mol}$ ) and freshly activated molecular sieves 4 $\text{\AA}$  in 3 mL of  $\text{CH}_2\text{Cl}_2$  and  $\text{CH}_3\text{CN}$  (2:1) was stirred at rt for 15 min. Then, 1*H*-tetrazole (0.45 M in  $\text{CH}_3\text{CN}$ , 71  $\mu\text{L}$ , 32  $\mu\text{mol}$ ) was added to the mixture, which was stirred for another 40 min, before TLC showed the completion of reaction. The mixture was cooled to  $-20\text{ }^\circ\text{C}$ , and *m*-CPBA (2.8 mg, 16.0  $\mu\text{mol}$ ) was added. The reaction was slowly warmed to rt in 1 h, and then quenched with saturated aq.  $\text{NaS}_2\text{O}_3$ . The water phase was extracted with  $\text{CH}_2\text{Cl}_2$  (3 $\times$ 30 mL), and the organic phase was combined, dried over  $\text{Na}_2\text{SO}_4$  and concentrated *in vacuo*. Finally, the residue was purified by silica gel column chromatography with EtOAc and toluene (1:15) as the eluent to afford **2** (11.6 mg, 70%) as syrup. For one stereoisomer:  $^1\text{H}$  NMR (600 MHz,  $\text{CDCl}_3$ ):  $\delta$  5.39 (s, 1H, Man<sup>A</sup> H-1), 5.25 (s, 1H, Man<sup>B</sup> H-1), 5.19 (s, 1H, Ara<sup>A</sup> H-1), 5.12 (s, 1H, Ara H-1), 5.06 (s, 1H, Ara H-1), 5.01 (s, 1H, Man<sup>C</sup> H-1), 4.98 (s, 1H, Man<sup>D</sup> H-1), 4.93 (s, 1H, Man<sup>E</sup> H-1), 4.82 (s, 1H, Man<sup>F</sup> H-1).  $^{31}\text{P}$  NMR (162 MHz,  $\text{CDCl}_3$ )  $\delta$  -0.42, -0.18.  $^{13}\text{C}$  NMR (150 MHz,  $\text{CDCl}_3$ ):  $\delta$  106.65 (Ara<sup>A</sup> C-1), 106.32 (Ara<sup>C</sup> C-1), 106.29 (Ara<sup>D</sup> C-1), 99.02 (Man<sup>A</sup> C-1), 98.71 (Man<sup>B</sup> C-1), 98.51 (Man<sup>C</sup> C-1), 98.38 (Man<sup>D</sup> C-1), 98.25 (Man<sup>E</sup> C-1), 97.89 (Man<sup>F</sup> C-1). ESI-TOF MS (*m/z*): calcd for  $\text{C}_{317}\text{H}_{383}\text{O}_{56}\text{NPK}$  [ $\text{M} + \text{K} + \text{NH}_4$ ]<sup>2+</sup>, 2584.8; found, 2584.0.

**6-O-[( $\alpha$ -D-Arabinosyl)-(1 $\rightarrow$ 5)-( $\alpha$ -D-arabinosyl)-(1 $\rightarrow$ 5)-( $\alpha$ -D-arabinosyl)-(1 $\rightarrow$ 6)-( $\alpha$ -D-mannopyranosyl)-(1 $\rightarrow$ 6)-( $\alpha$ -D-mannopyranosyl)-(1 $\rightarrow$ 6)-( $\alpha$ -D-mannopyranosyl)-(1 $\rightarrow$ 6)-( $\alpha$ -D-mannopyranosyl)-(1 $\rightarrow$ 6)-( $\alpha$ -D-mannopyranosyl)]-1-O-(1,2-di-O-stearoyl-*sn*-glycero-3-phosphoryl)-2-O-[(6-O-stearoyl- $\alpha$ -D-mannopyranosyl)]-D-*myo*-inositol (1):**

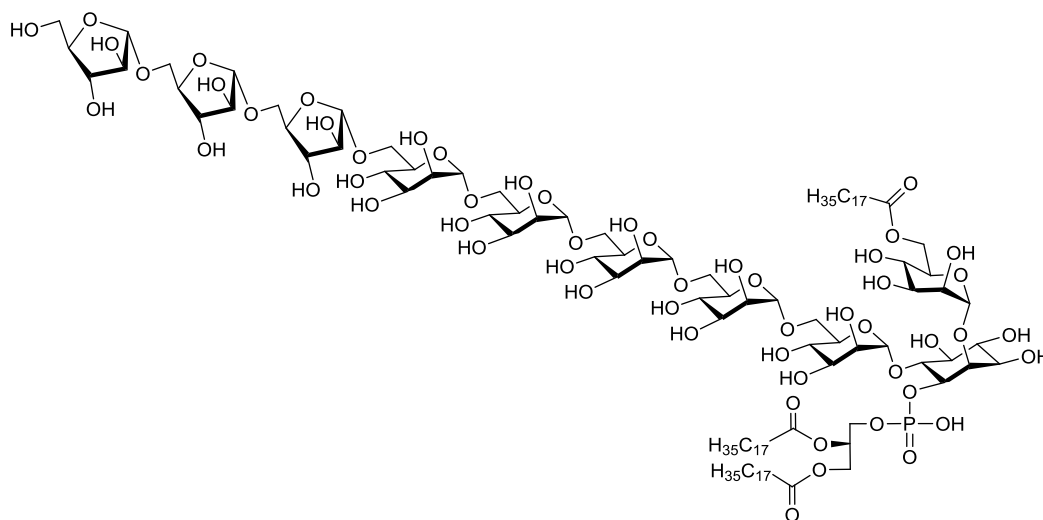

The reaction mixture of **2** (11 mg, 2.2  $\mu$ mol) and 10% Pd/C (8 mg) in CHCl<sub>3</sub>, MeOH and H<sub>2</sub>O (3:3:1, 3.5 mL) was stirred under a H<sub>2</sub> atmosphere (50 psi) for 4 days. The solution was filtered off, and the filtrate was concentrated *in vacuo* to afford the target molecule **1** (4.0 mg, 74%) as an off-white solid. <sup>1</sup>H NMR (700 MHz, CD<sub>3</sub>OD, CDCl<sub>3</sub>, and D<sub>2</sub>O 3:3:1)  $\delta$ : 5.13 (s, 1H), 5.08 (s, 1H), 4.97 (s, 1H), 4.82 (s, 4H), 2.36-2.18 (m, 6H), 1.64-1.56 (m, 6H), 1.38-1.15 (m, 84H), 0.78-0.88 (m, 6H). <sup>31</sup>P NMR (162 MHz, CD<sub>3</sub>OD, CDCl<sub>3</sub>, and D<sub>2</sub>O 3:3:1)  $\delta$ : 0.67. MALDI-TOF MS (*m/z*): calcd for C<sub>114</sub>H<sub>206</sub>O<sub>56</sub>PLi [M + Li + H]<sup>2+</sup>, 1254.6, found 1254.1.

## II. NMR spectra:

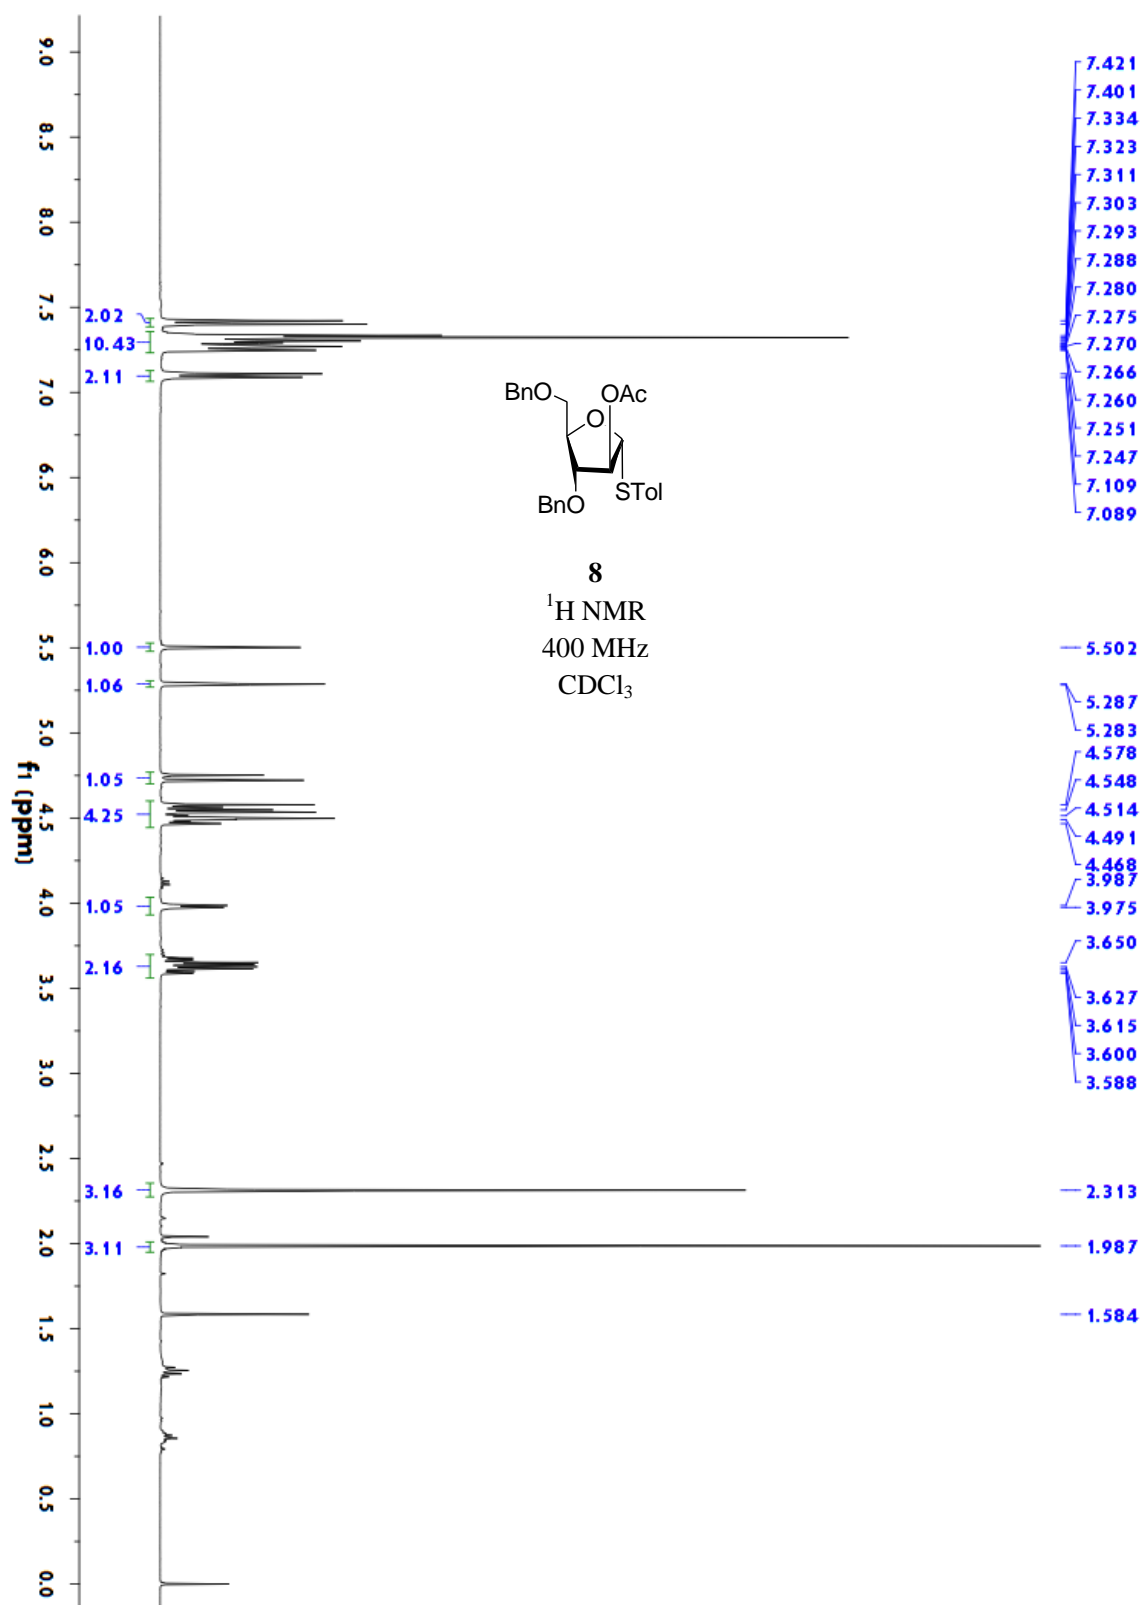

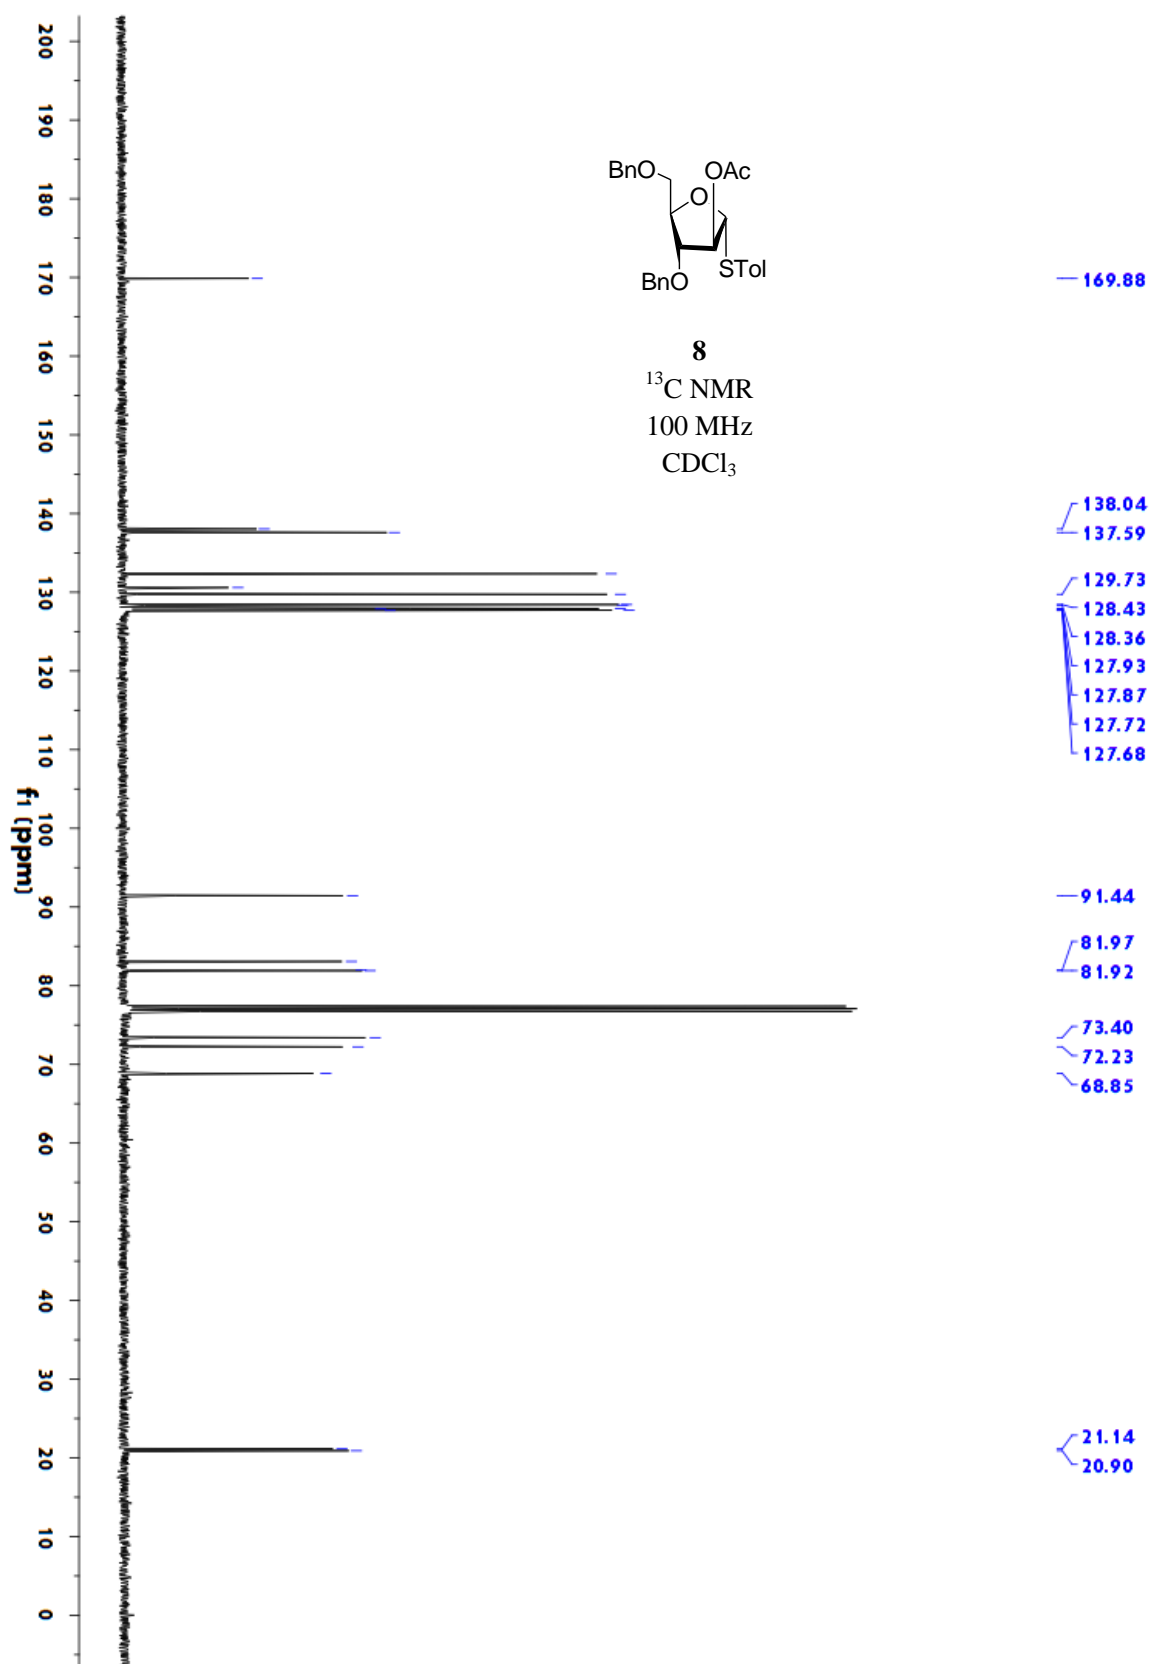



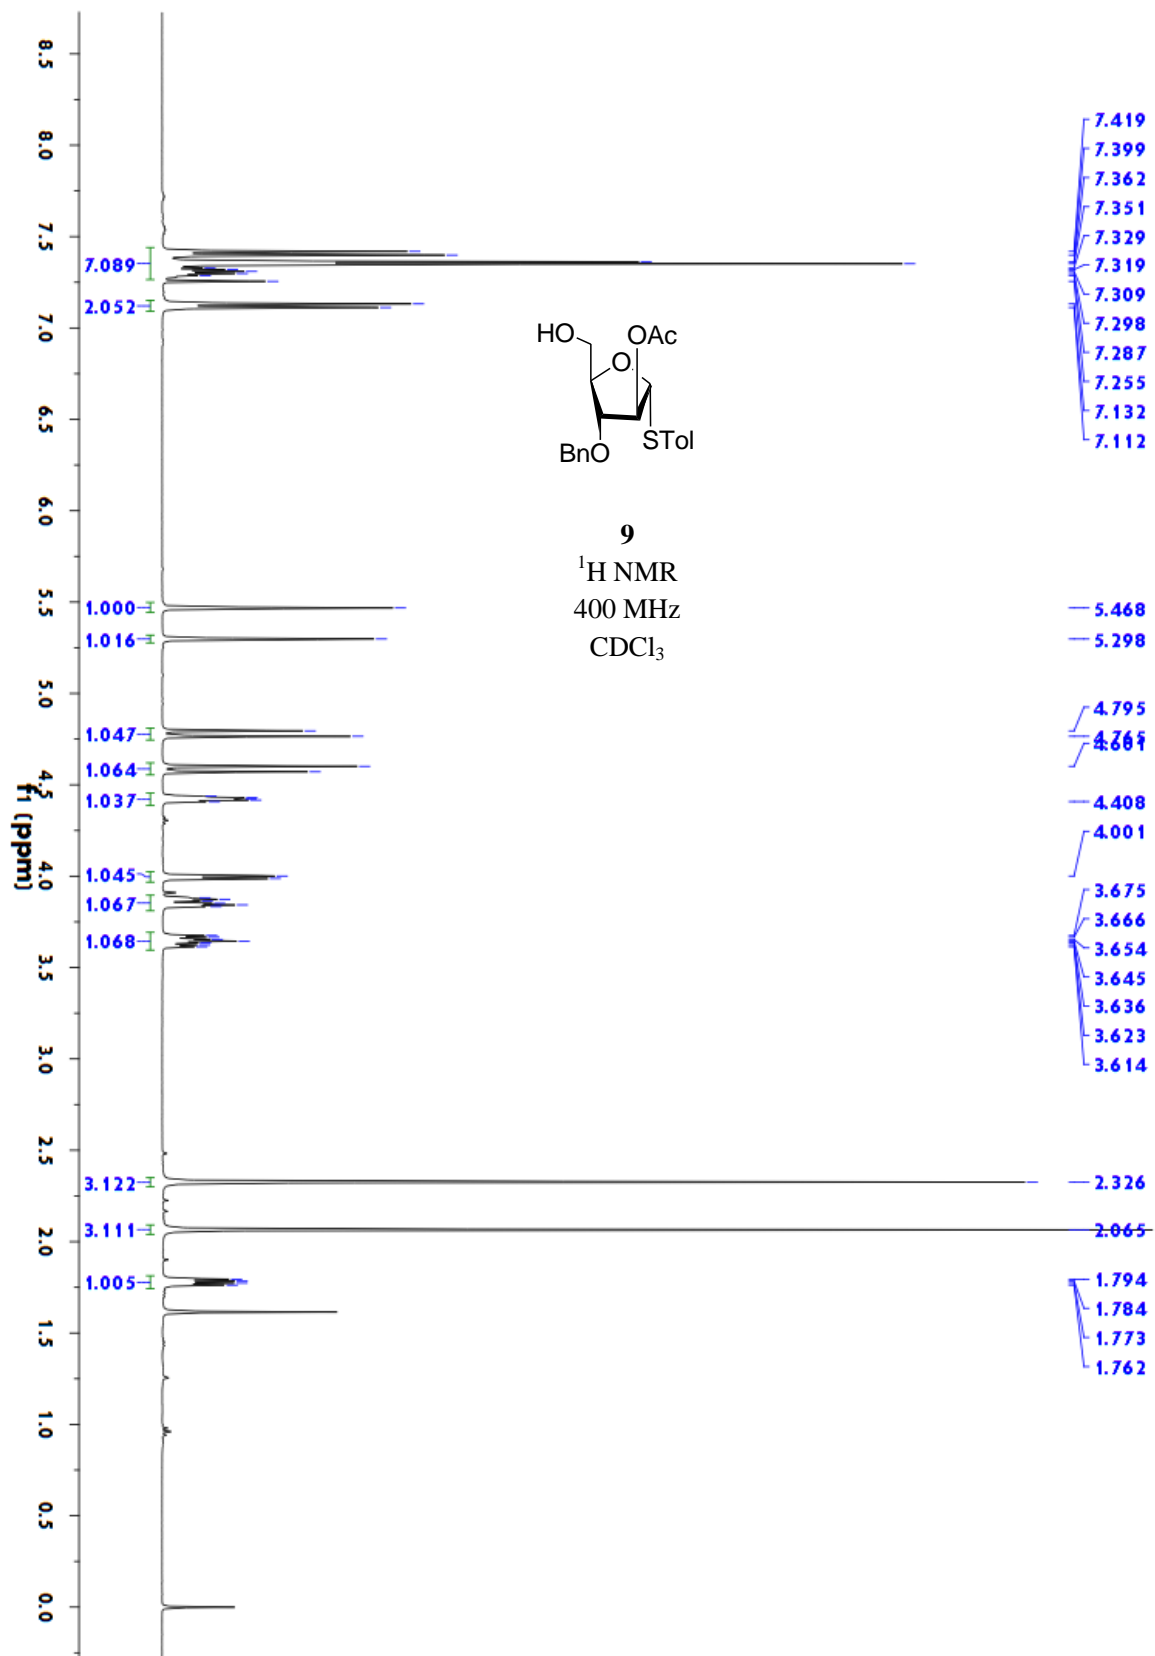

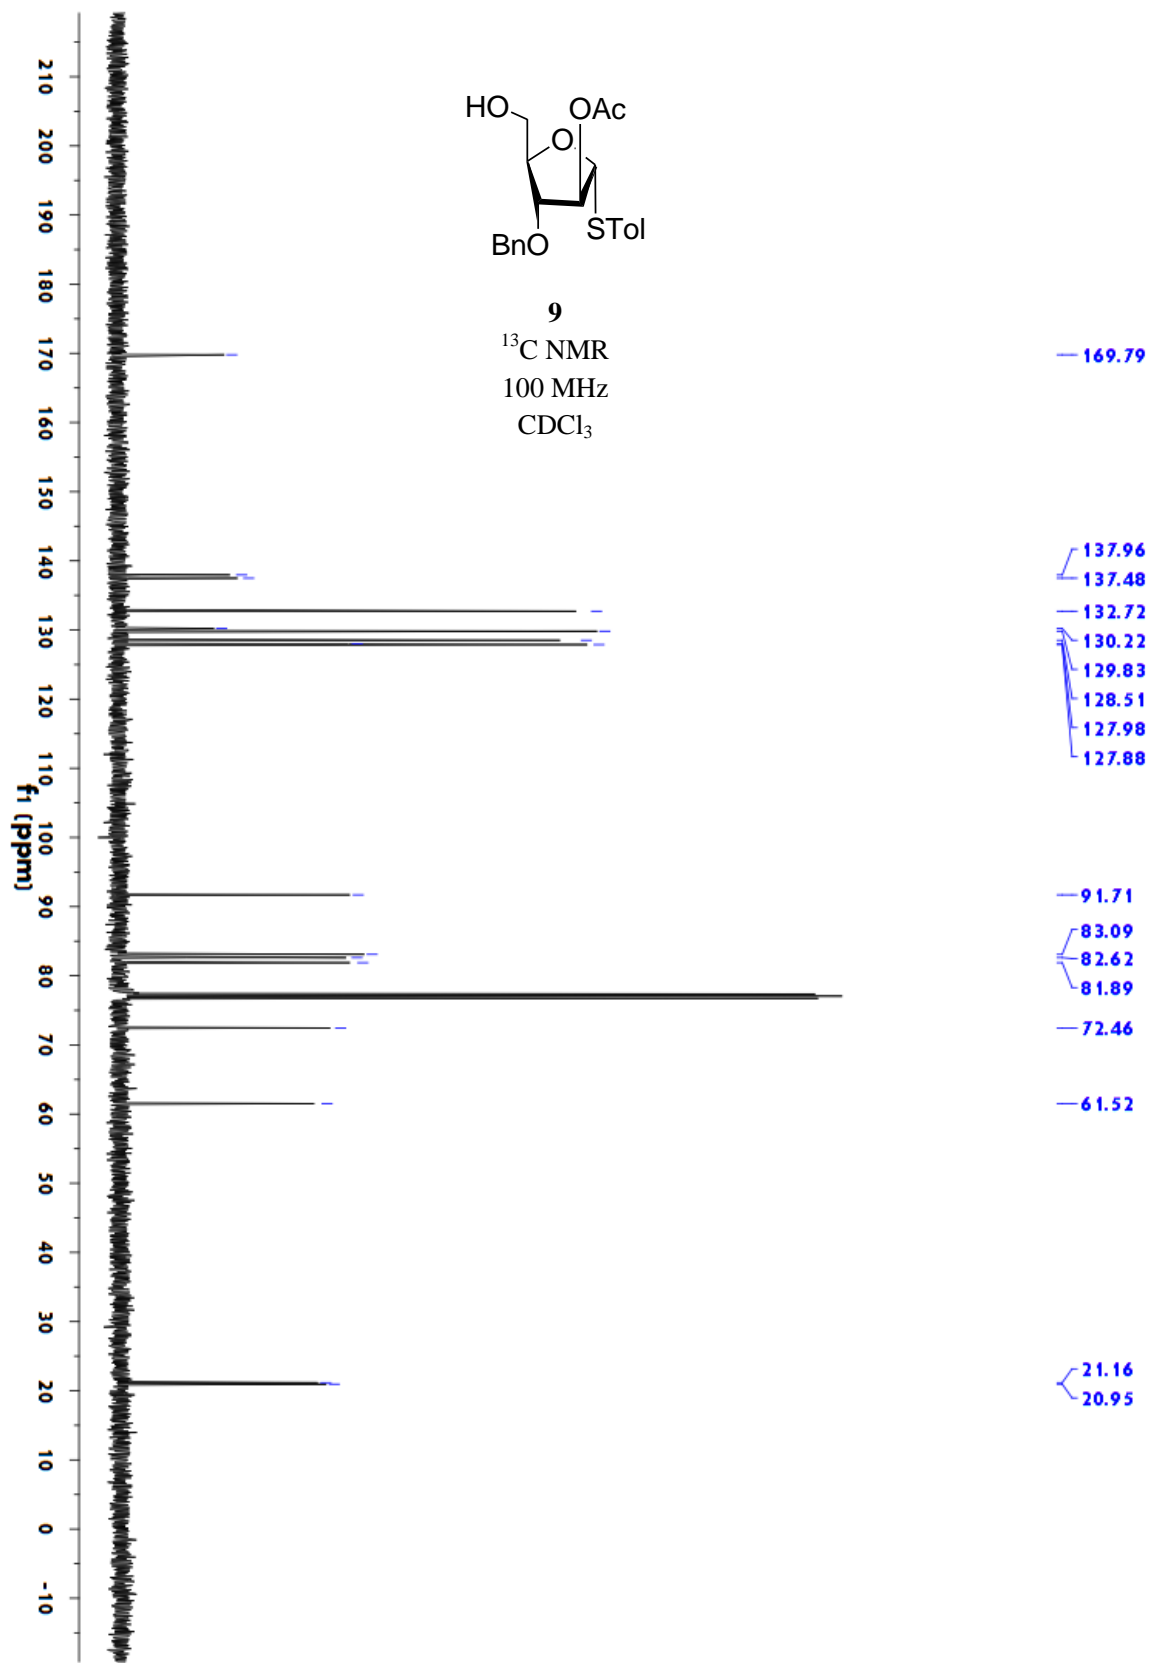

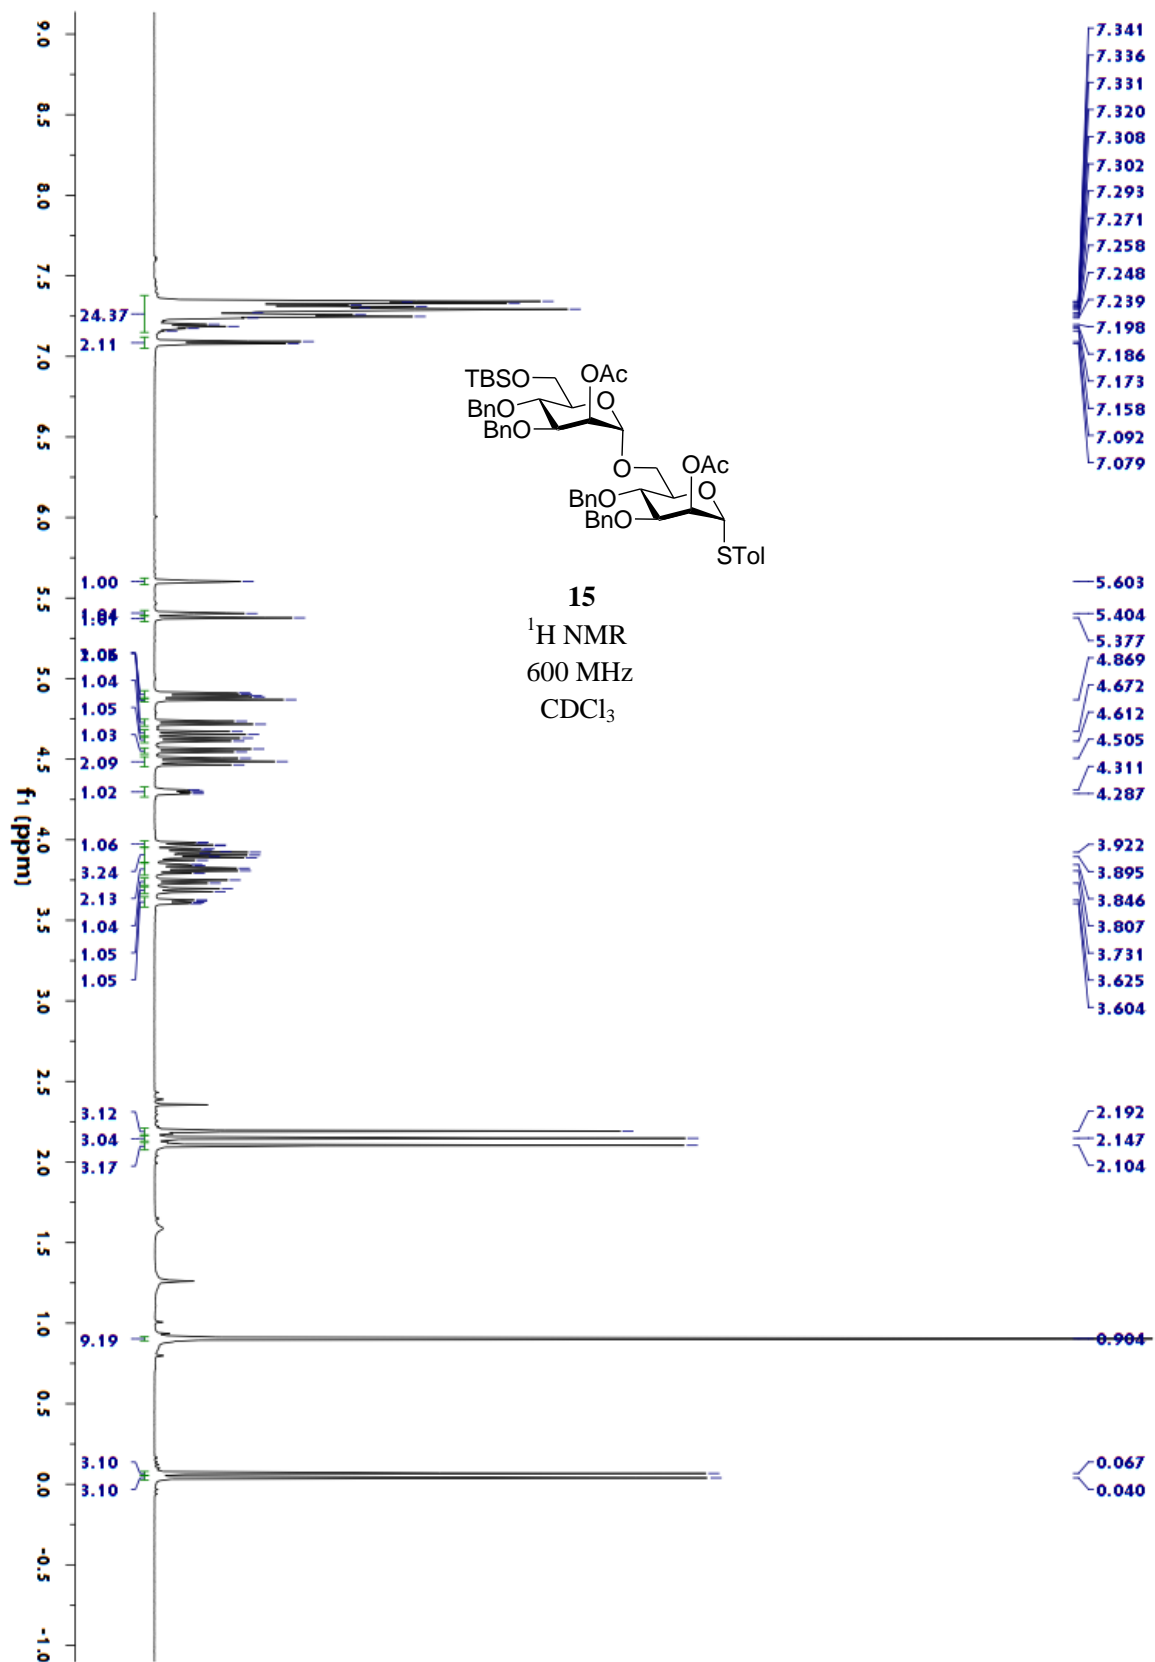

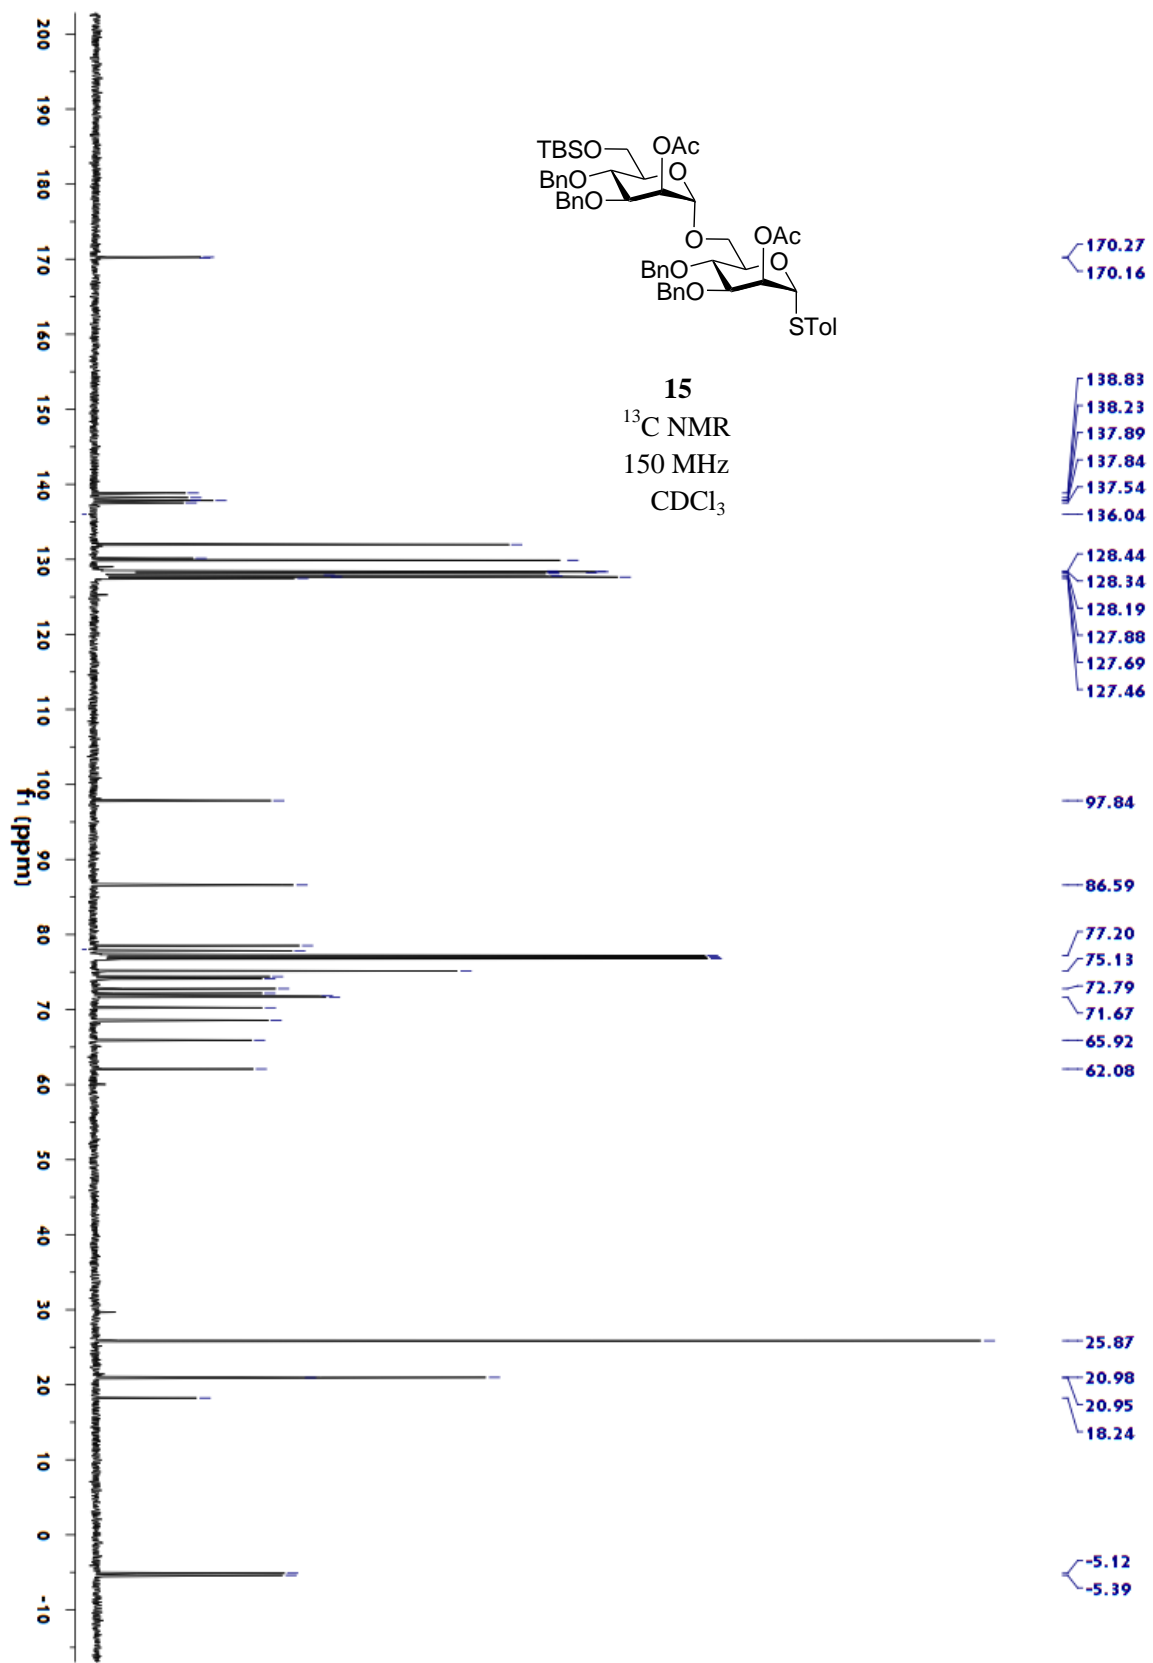

00130018

Sample Name:  
Data Collected on:  
#600-ymmr600  
Archive directory:  
/home/ymmr1/ymmrays/probes/probe\_caliba  
Sample directory:

FidFile: gCOSY

Pulse Sequence: gCOSY  
Solvent: cdcl3  
Data collected on: Apr 21 2013

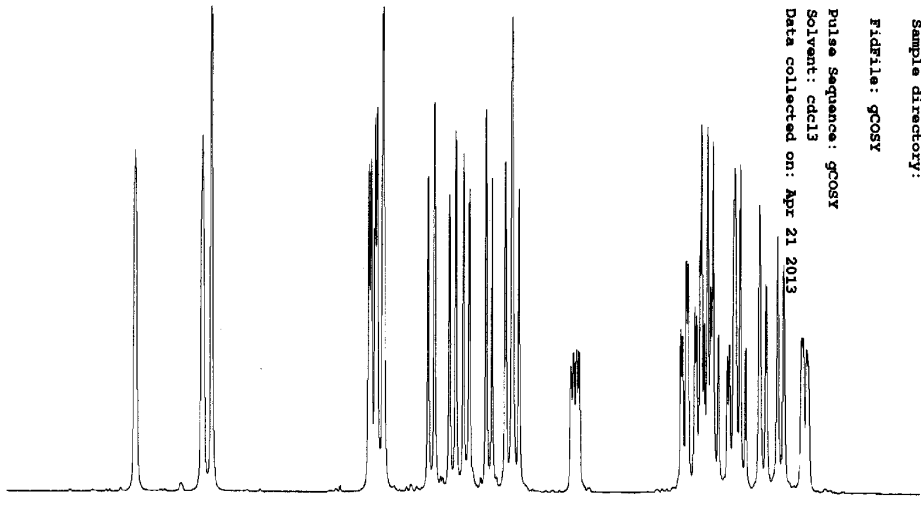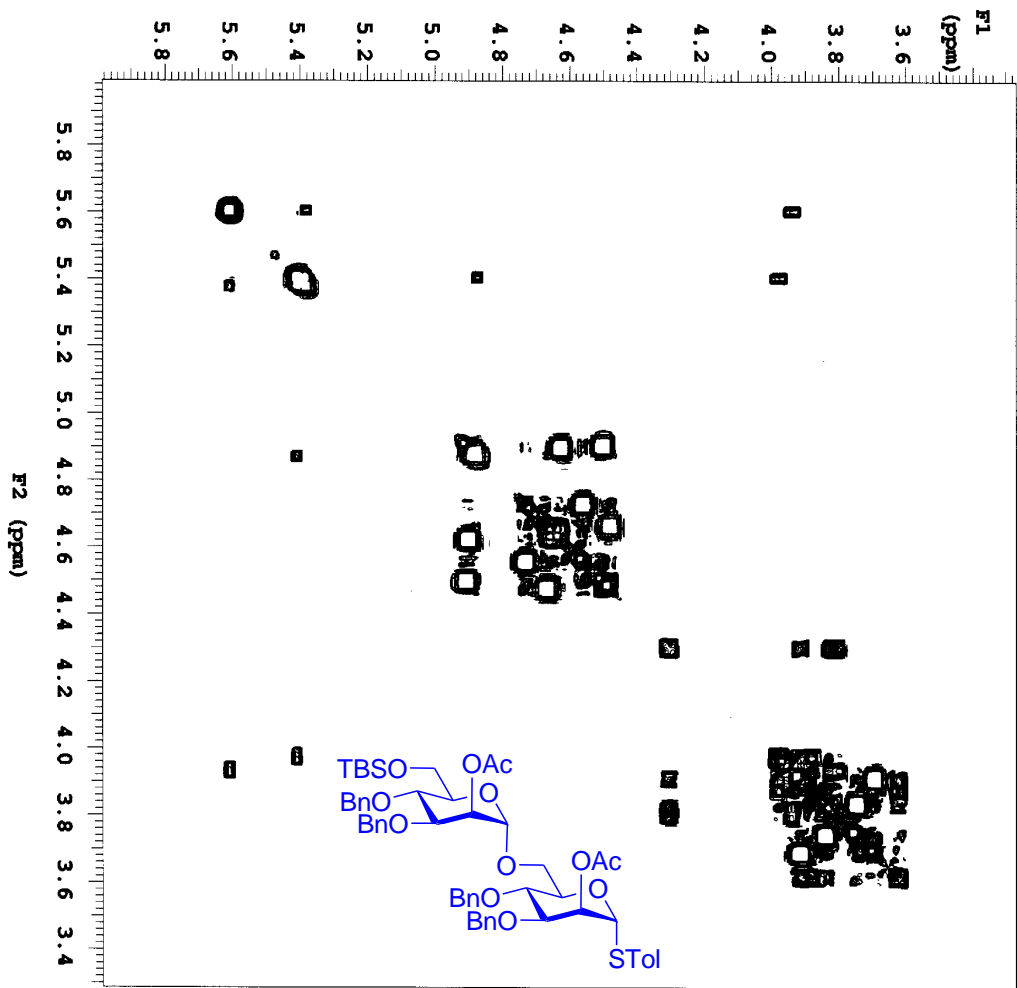

15  
<sup>1</sup>H-<sup>1</sup>H COSY  
600 MHz  
CDCl<sub>3</sub>

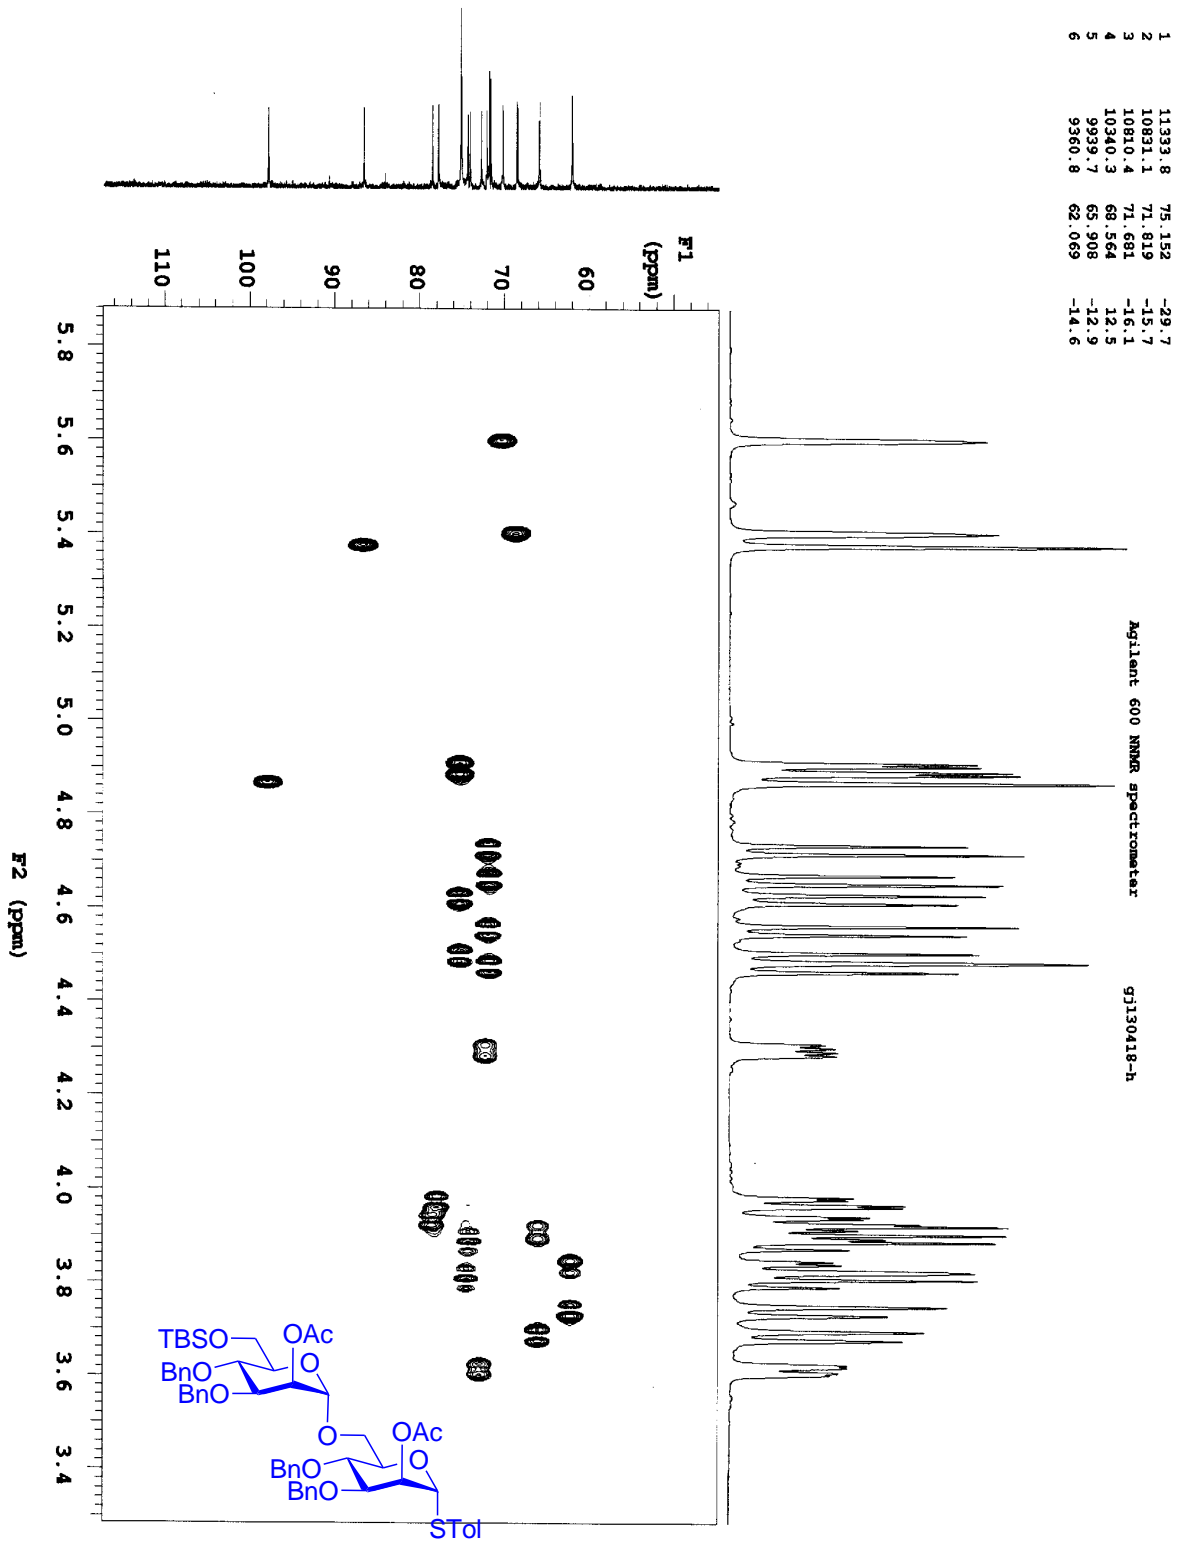

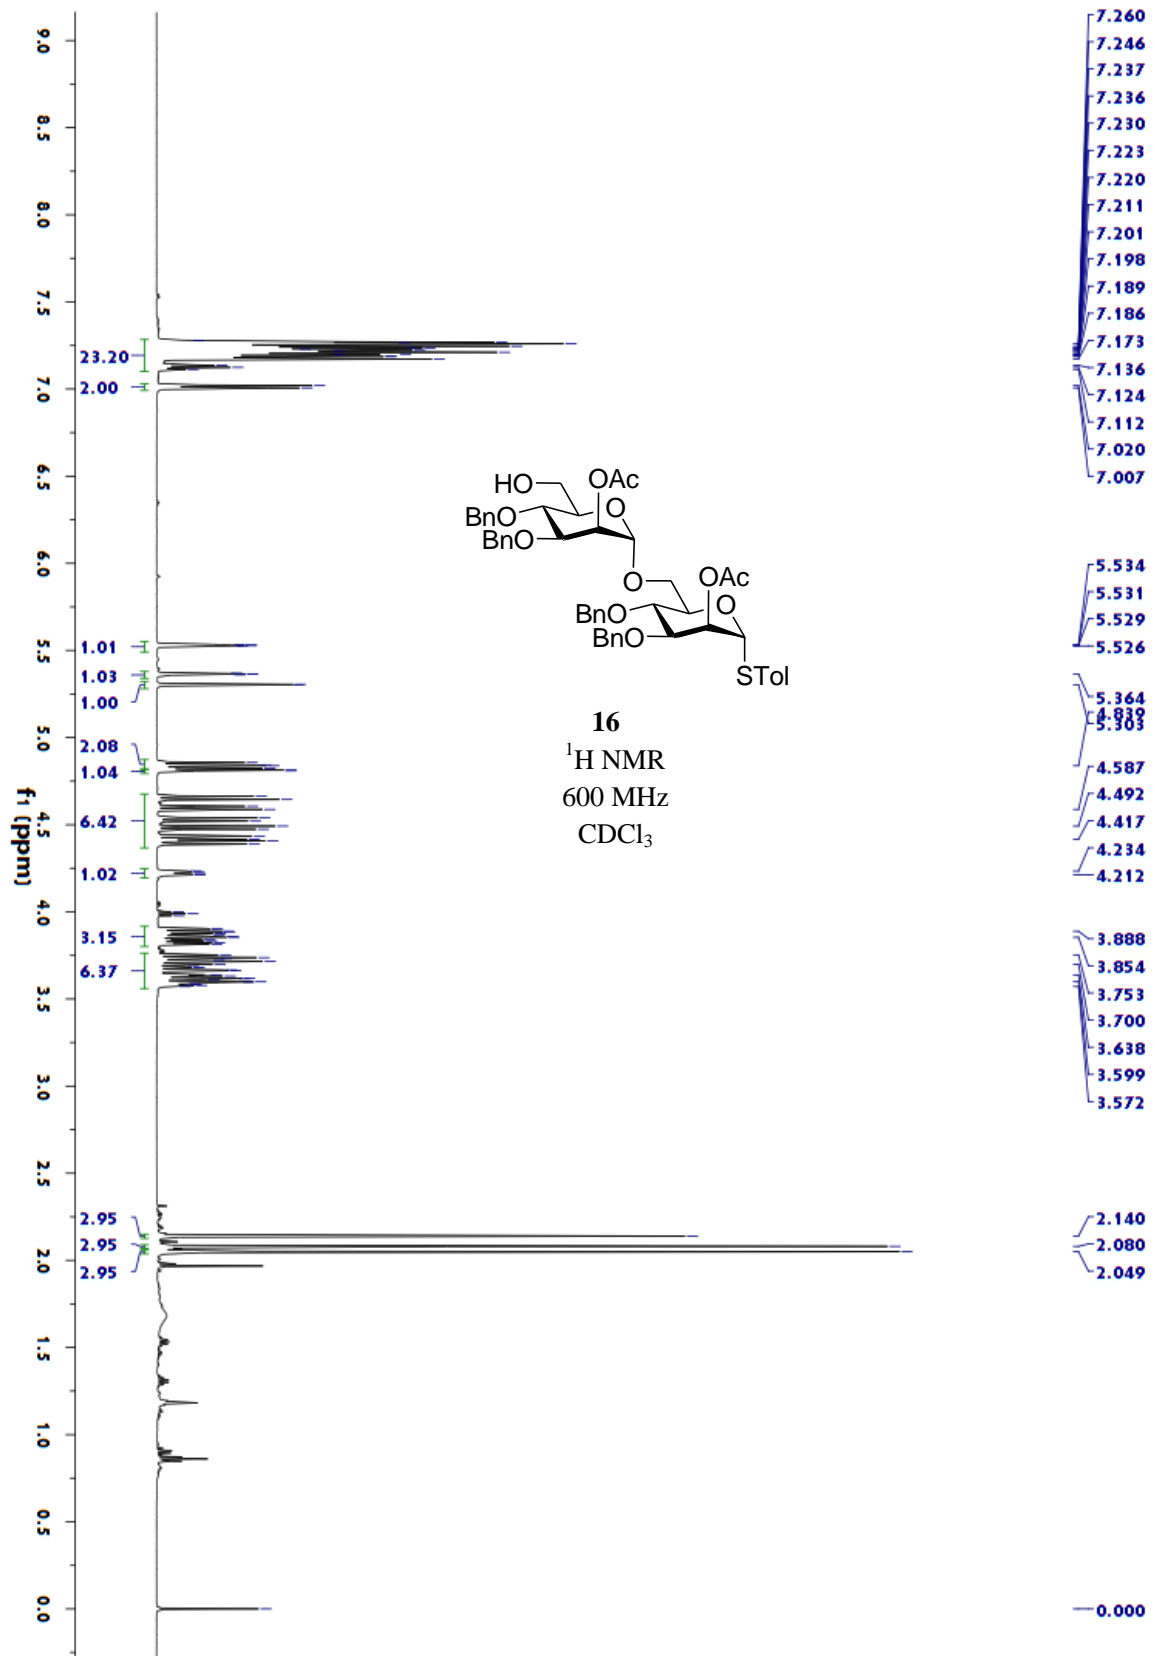

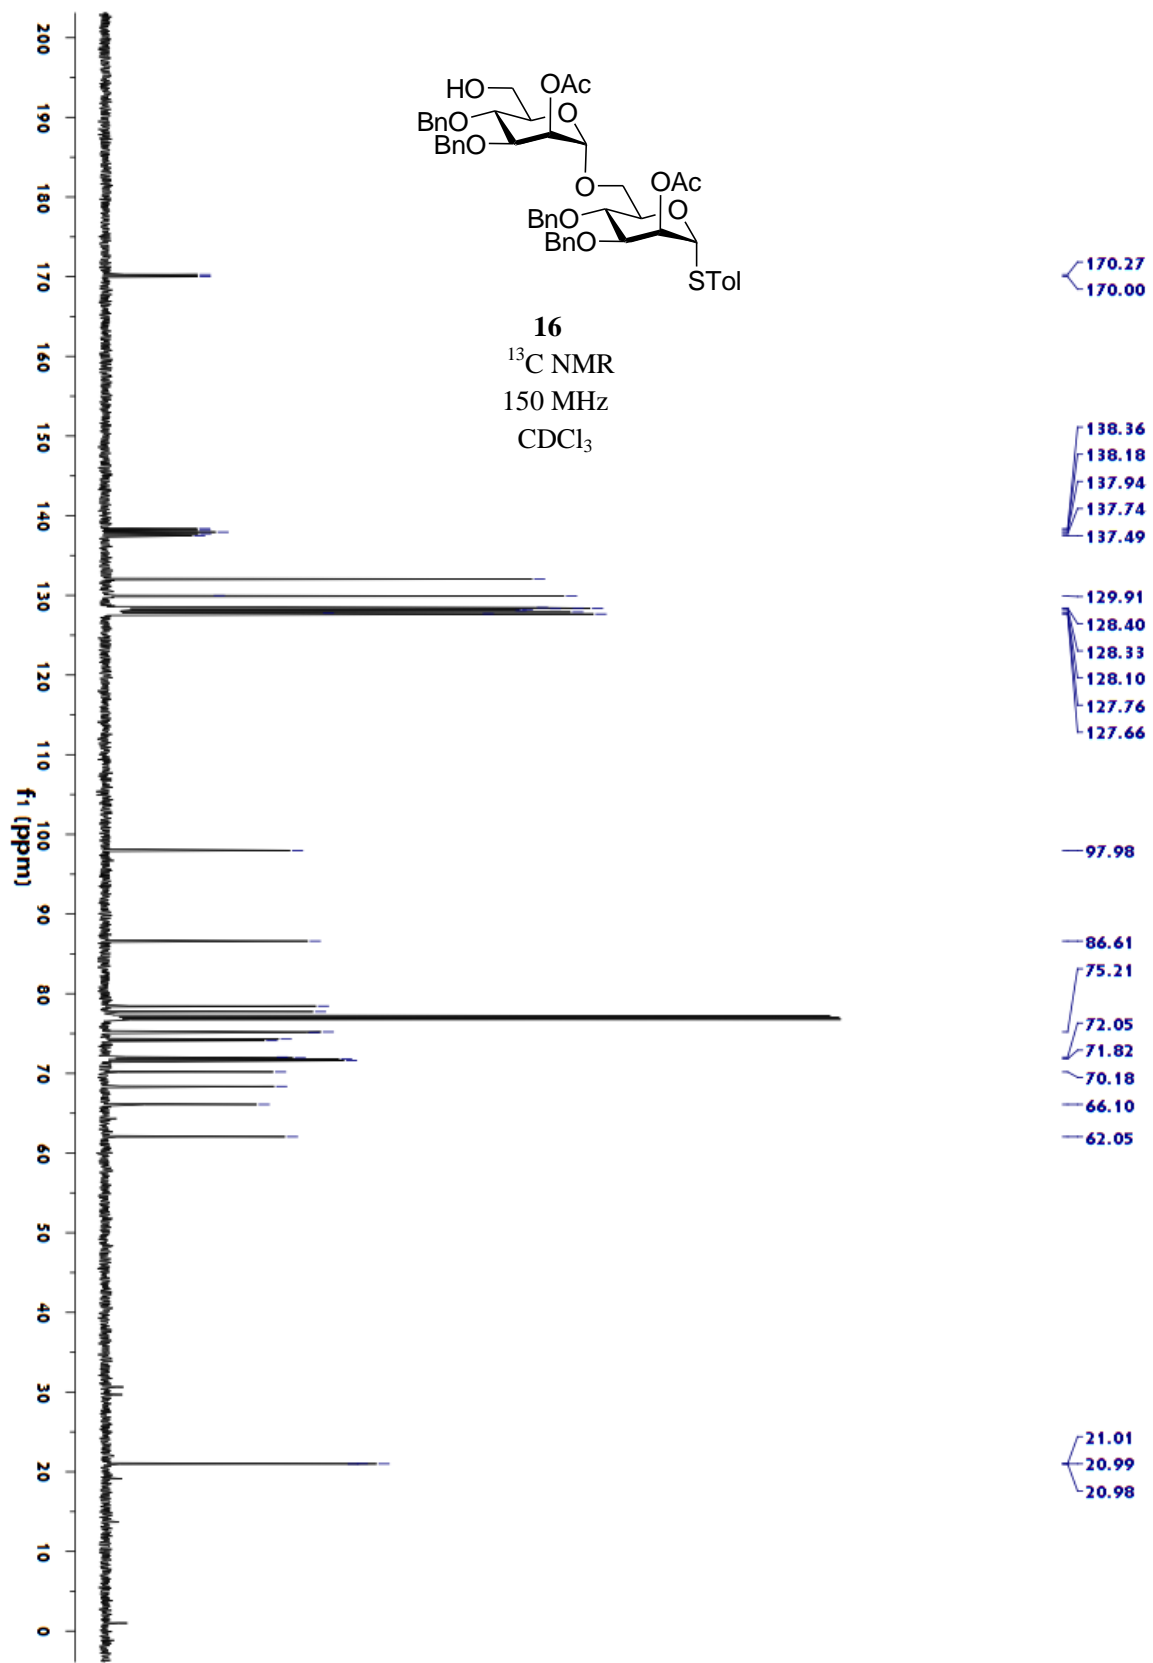



5130424

Sample Name:  
Data Collected on:  
600-nmr-600  
Archive directory:  
/home/vmrl/vmrays/probes/probe\_calibe  
Sample directory:

Pulse Sequence: gcosy  
Solvent: cdcl3  
Data collected on: Apr 24 2013

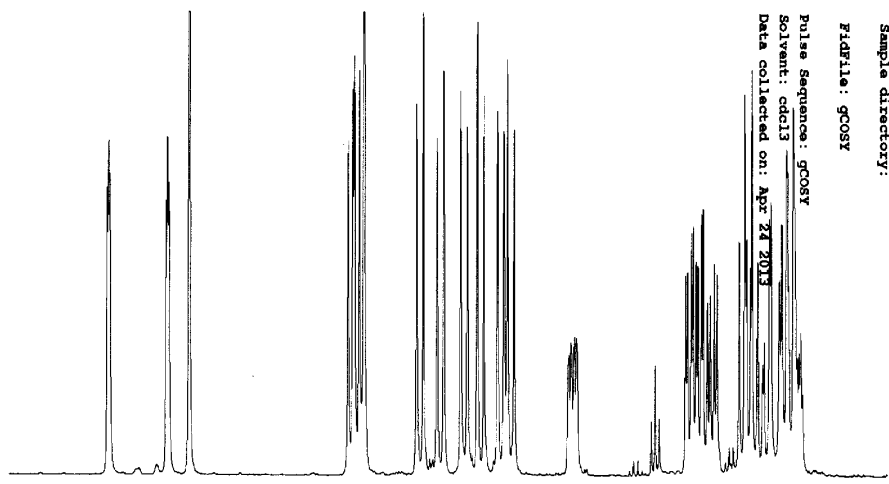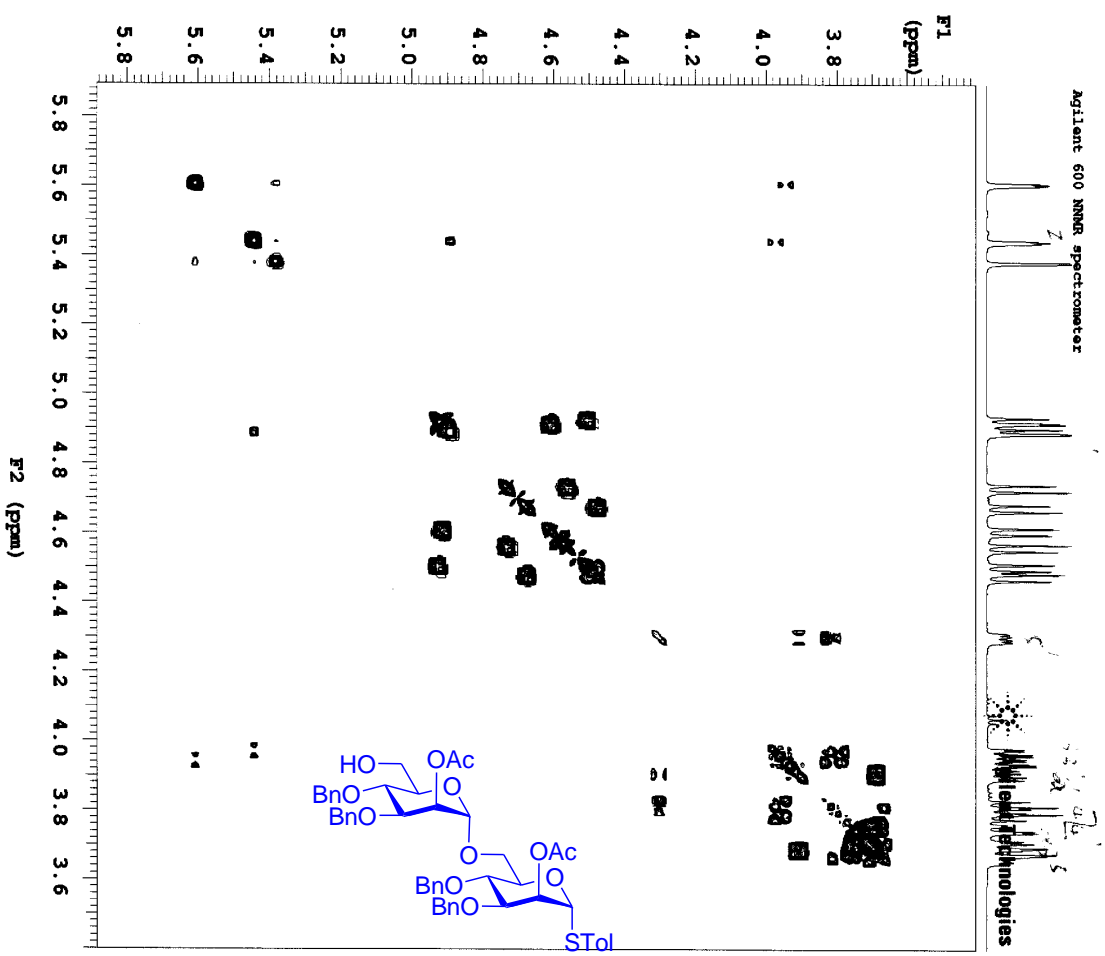

16  
<sup>1</sup>H-<sup>1</sup>H COSY  
600 MHz  
CDCl<sub>3</sub>

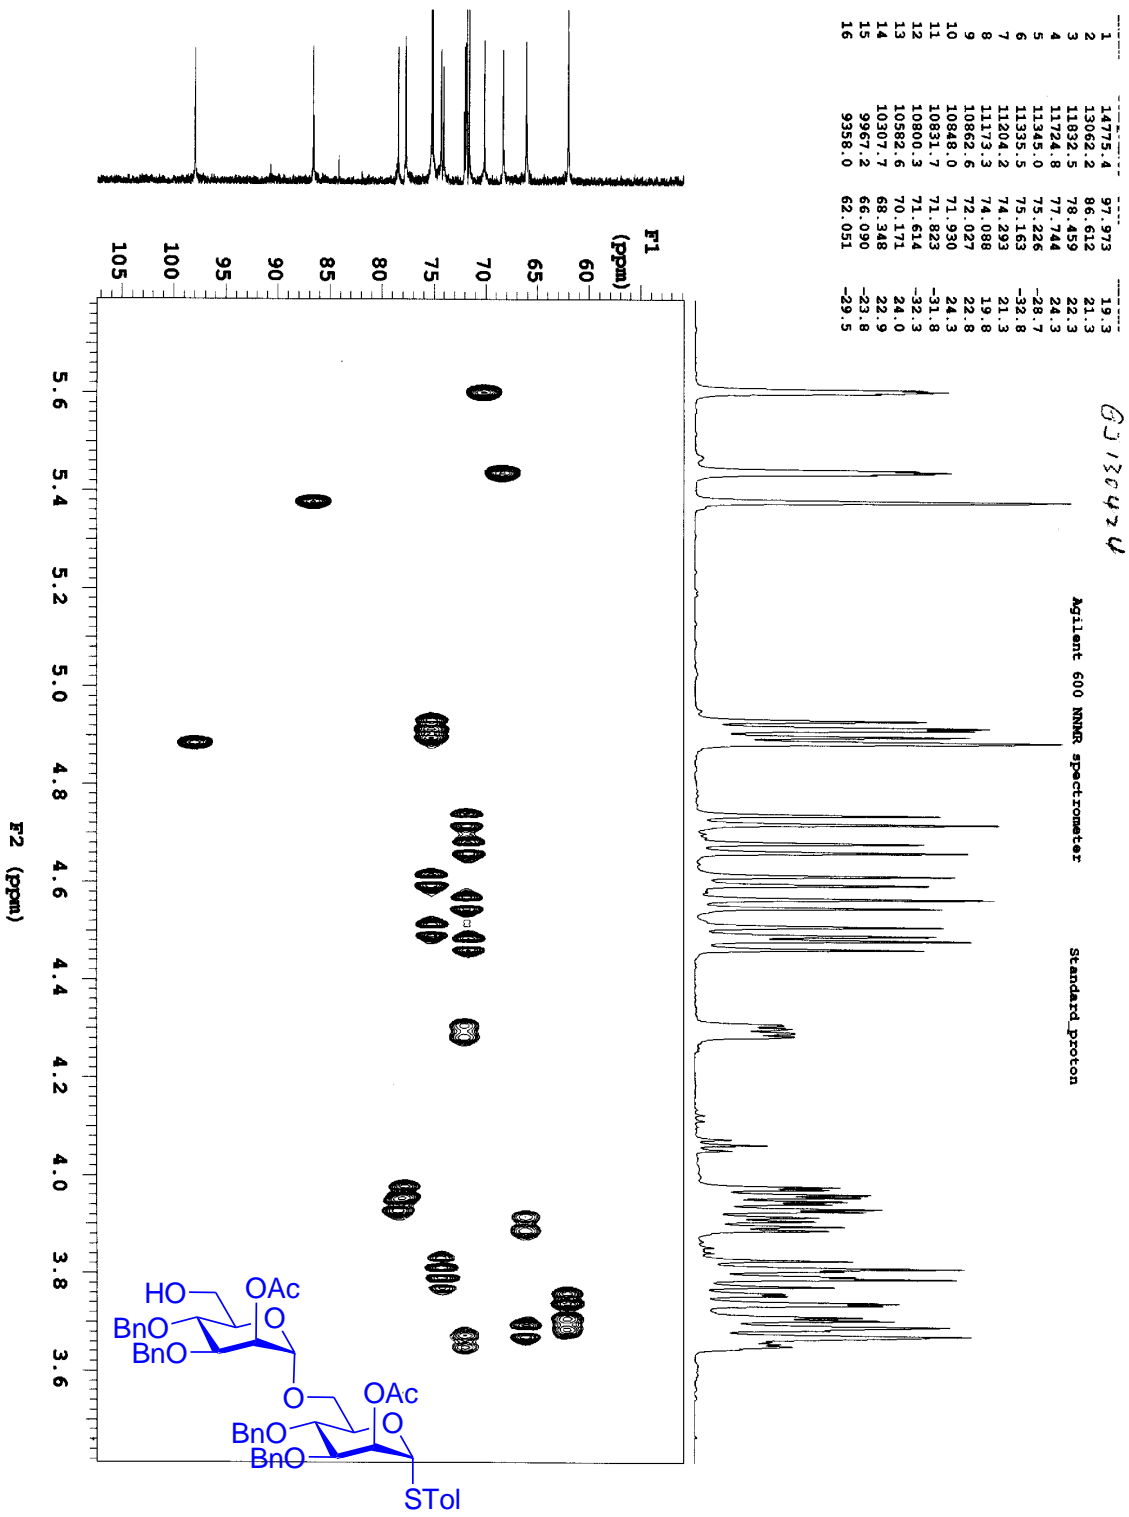

**16**  
 $^1\text{H}$ - $^{13}\text{C}$  HMQC  
 600/150 MHz  
 $\text{CDCl}_3$

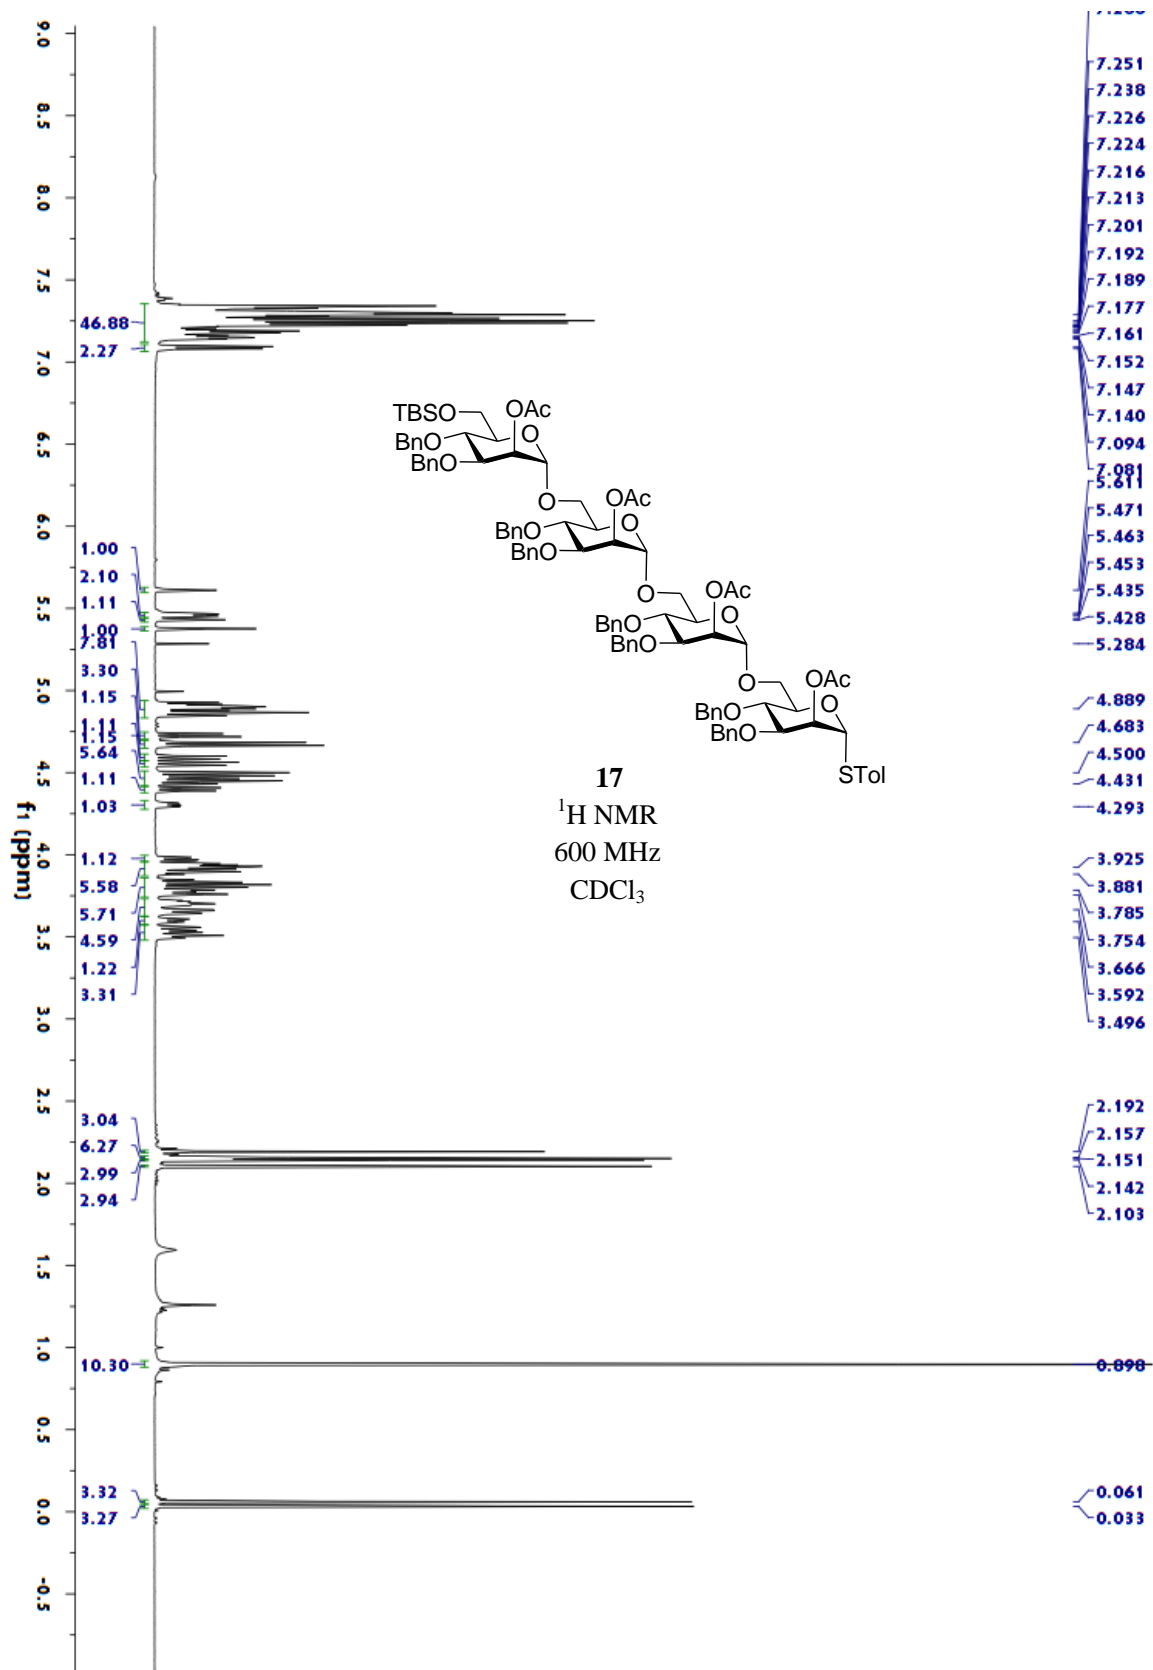

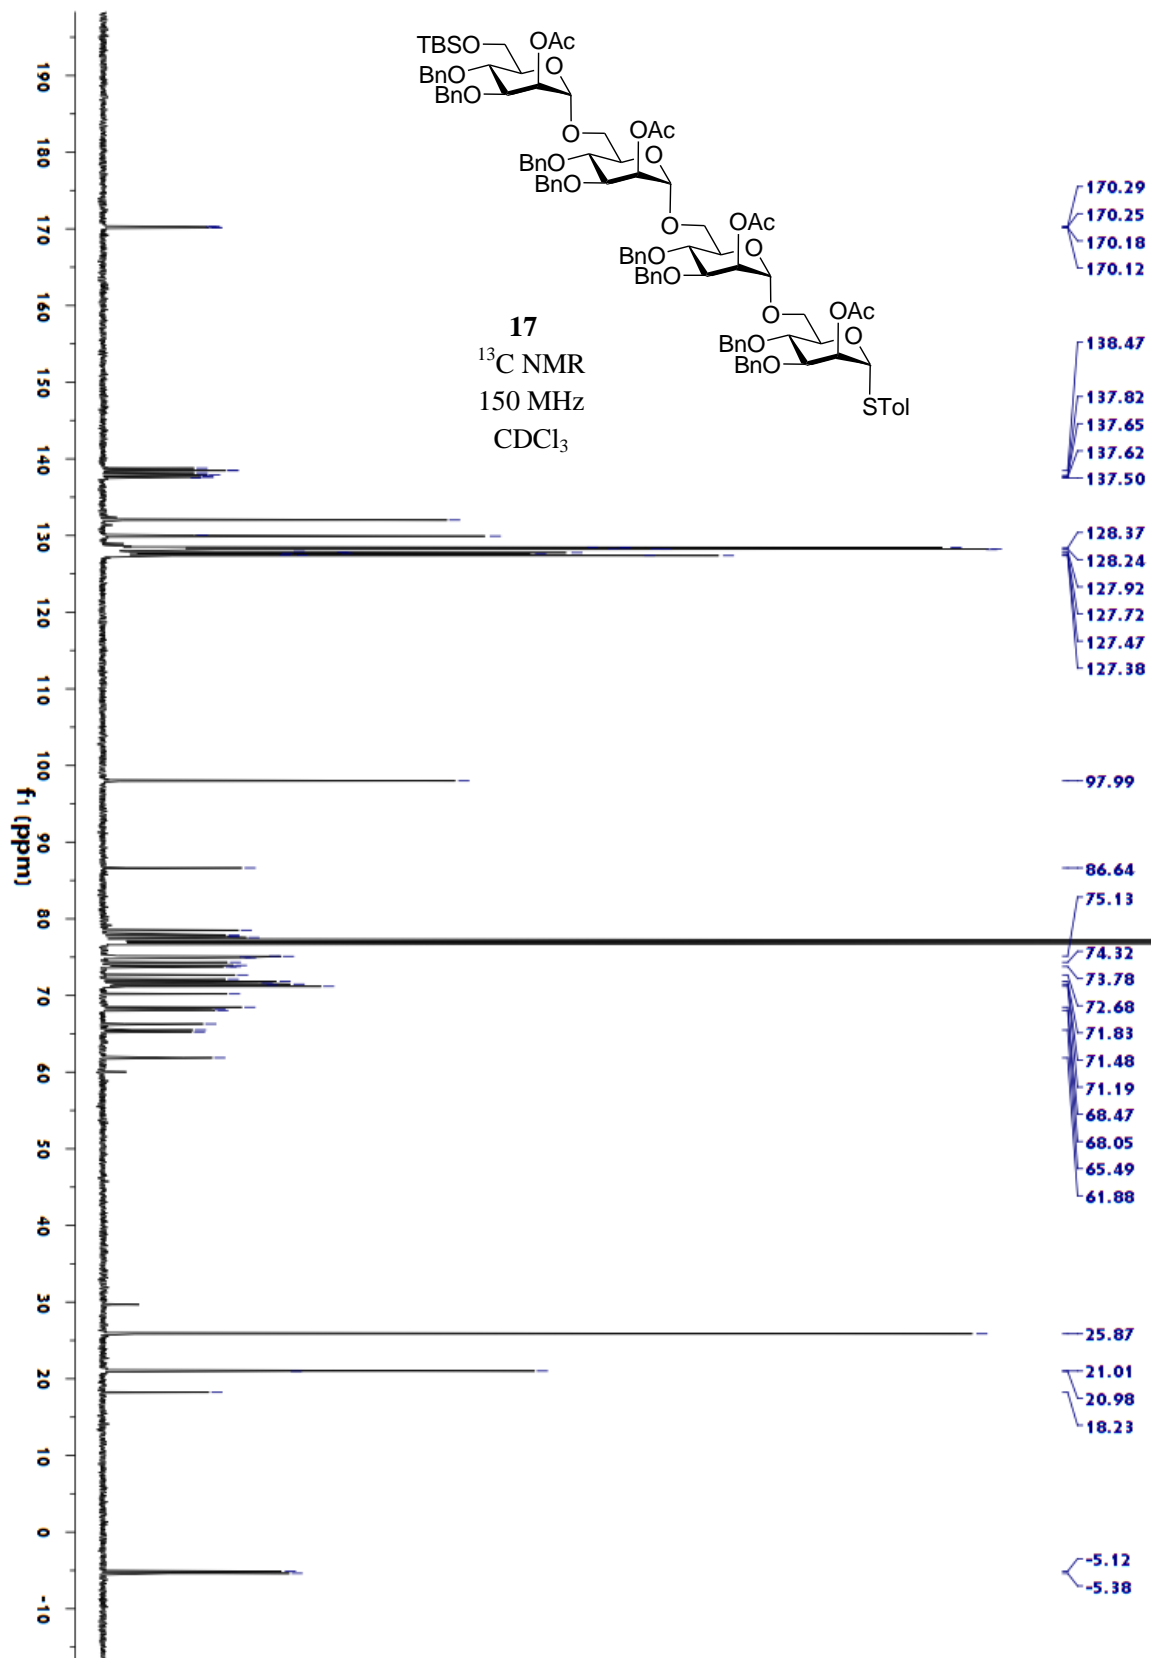

009902

Sample Name:

Data Collected on:

a600-vnmr5600

Archive directory:

/home/vnmr1/vnmr5600/probes/probe\_calibs

Sample directory:

Filefile: gCOSY

Pulse Sequence: gcosy

Solvent: cdcl3

Data collected on: May 15 2013

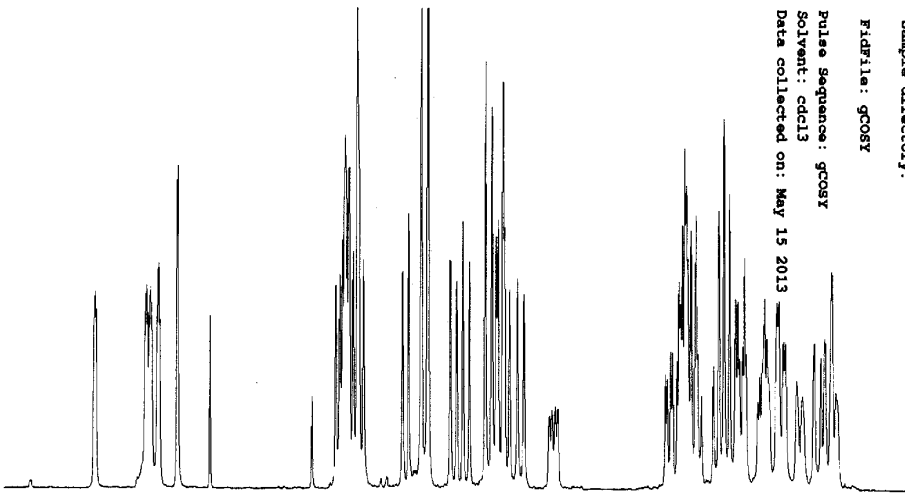

Agilent 600 NMR spectrometer

Agilent Technologies

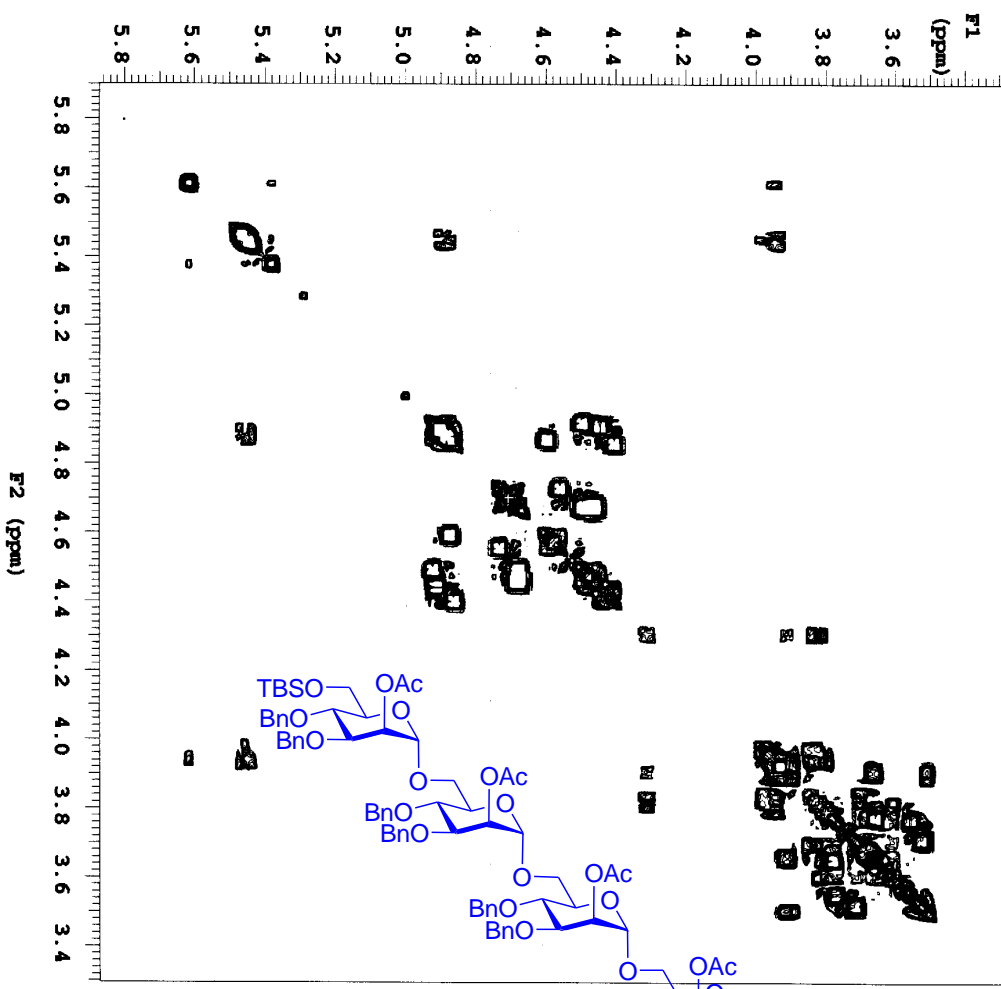

17  
<sup>1</sup>H-<sup>1</sup>H COSY  
600 MHz  
CDCl<sub>3</sub>

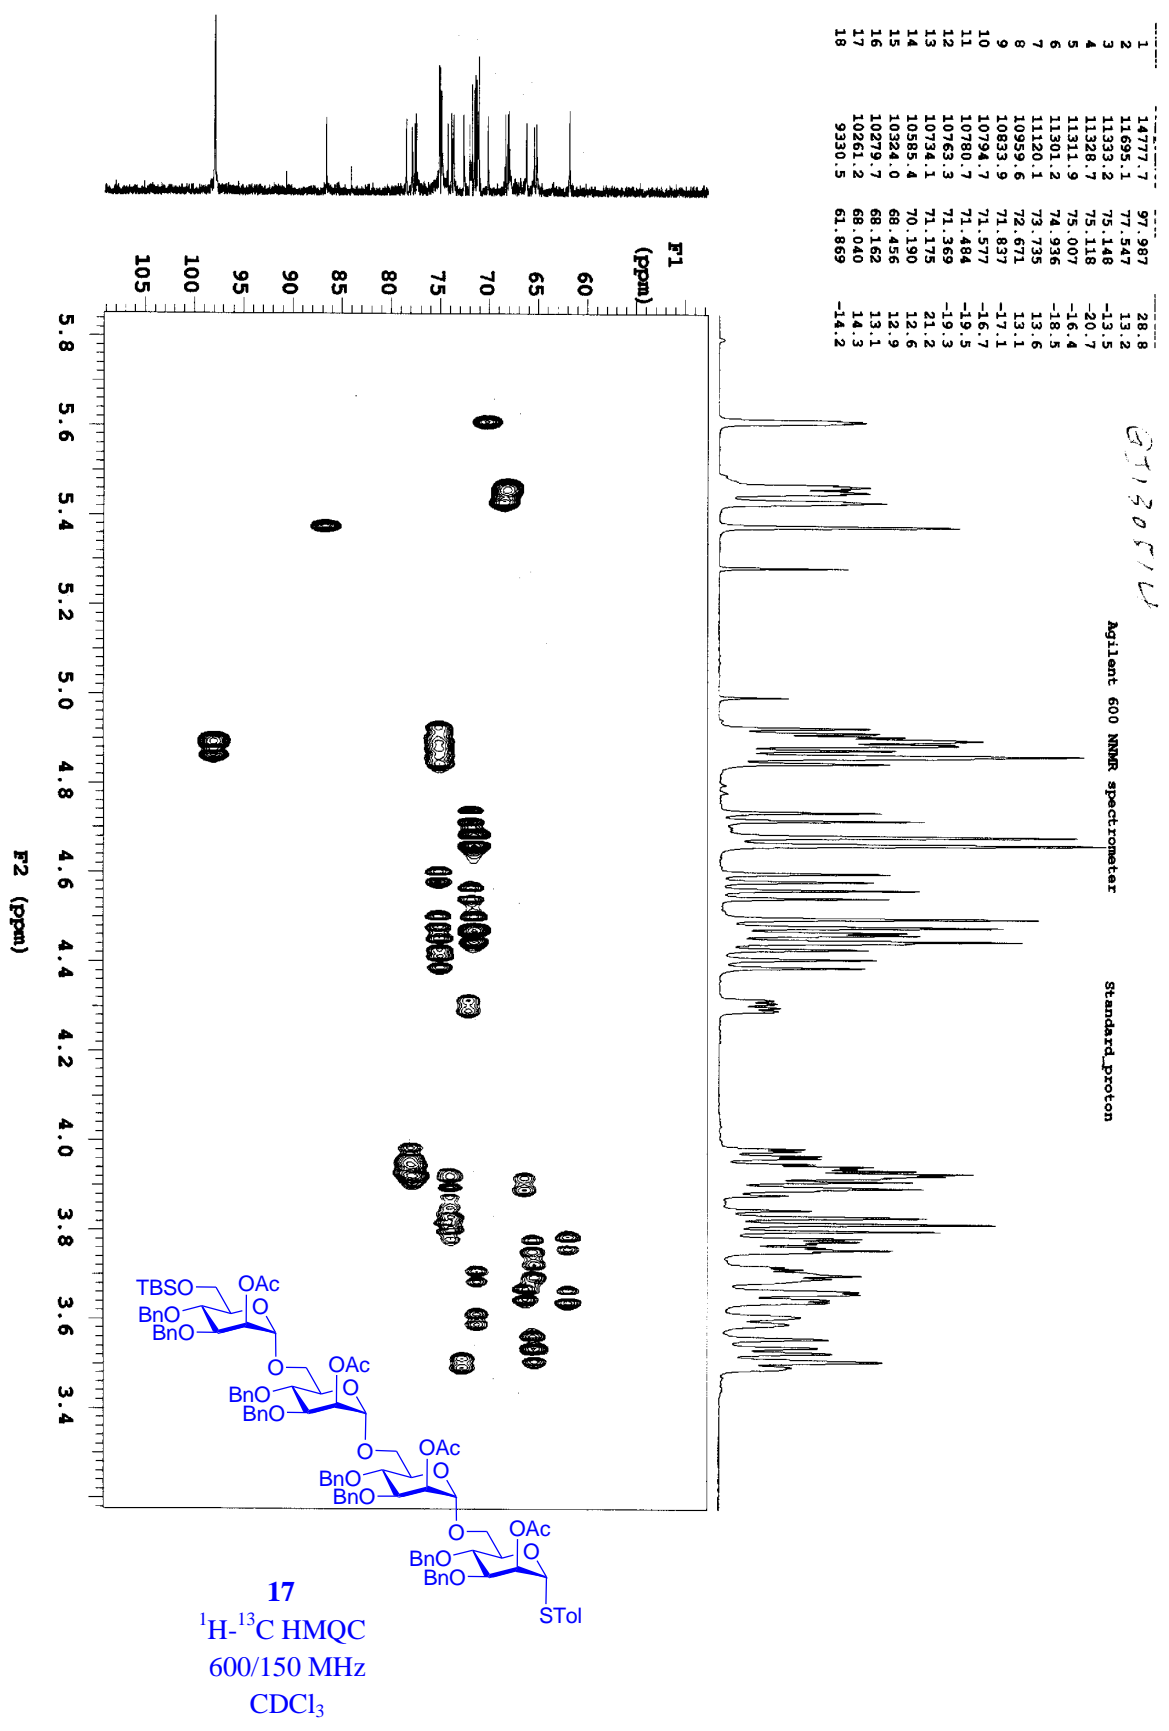

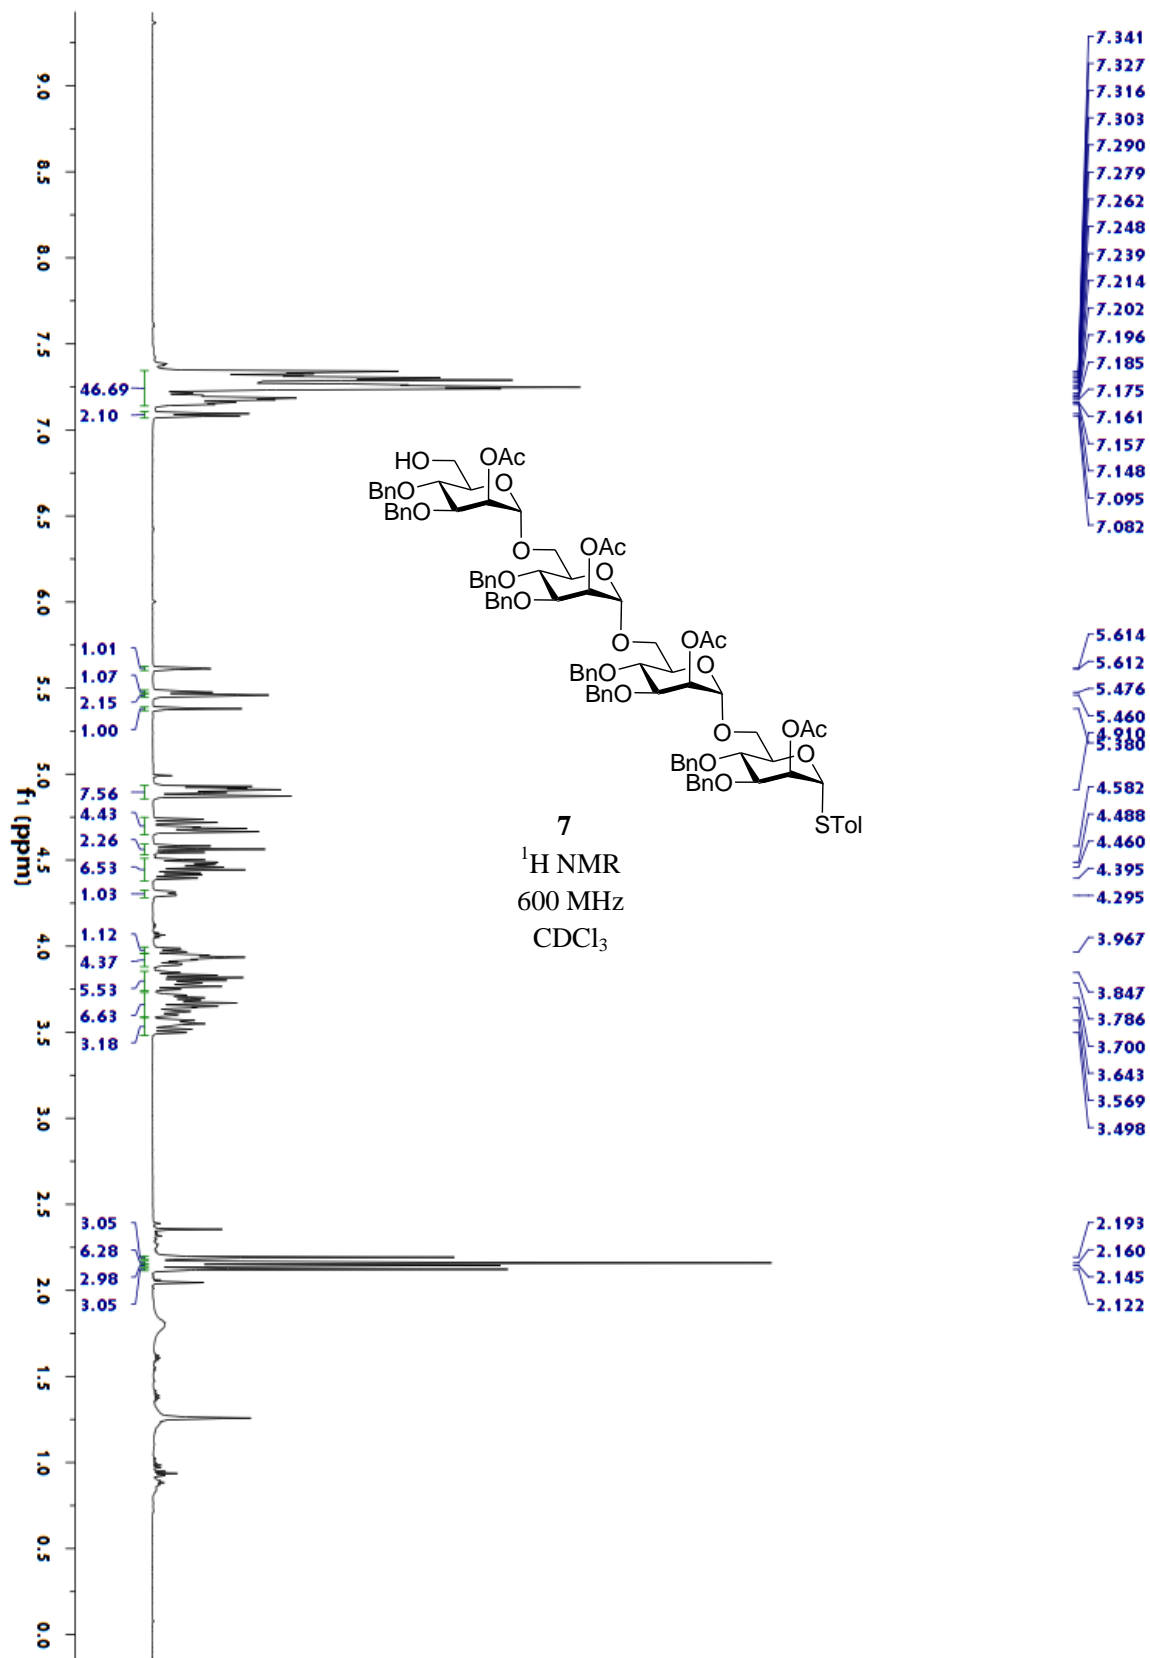

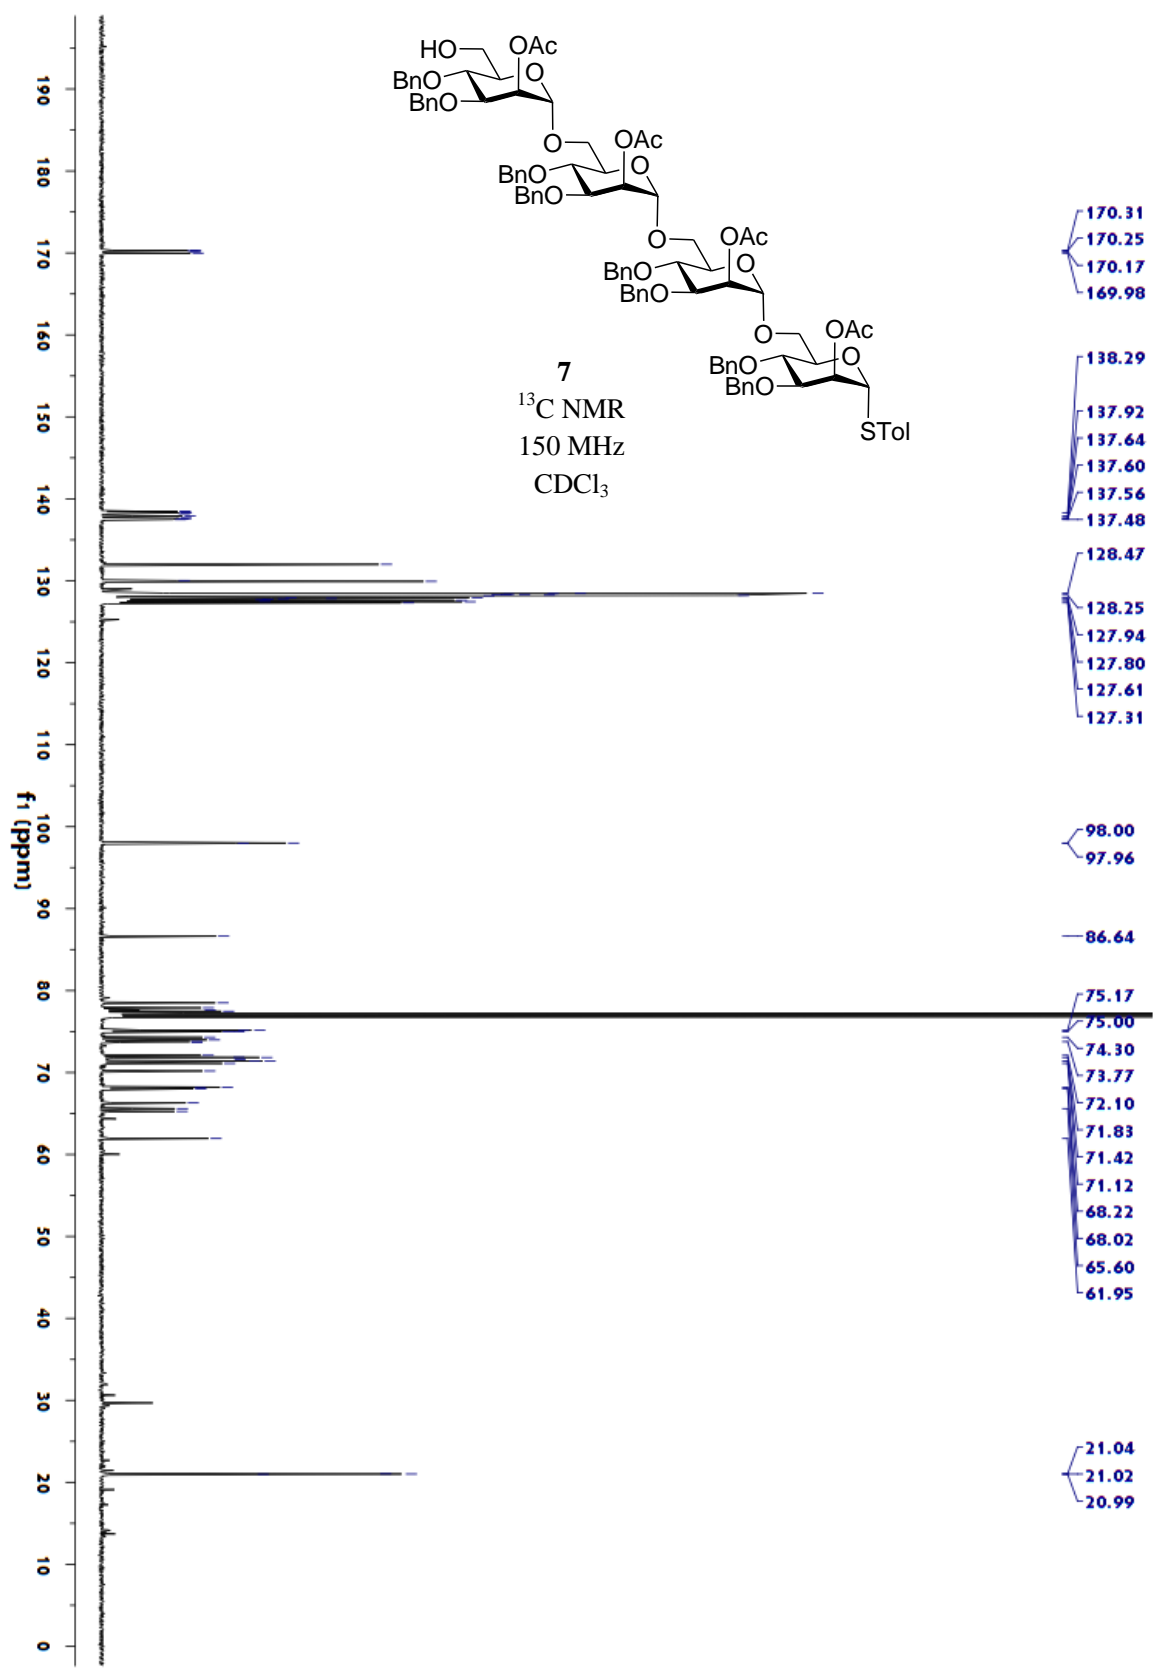



Sample Name:

Data Collected on:  
#600-ymms600  
Archive directory:  
/home/ymml/ymmsys/probes/probe\_calibs  
Sample directory:

Fidfile: gcosy

Pulse Sequence: gcosy  
Solvent: cdcl3  
Data collected on: Jun 16 2013

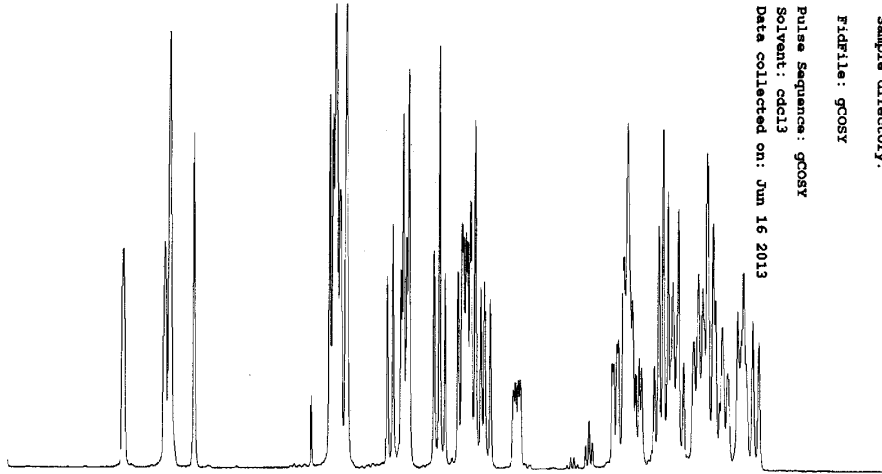

GJ130616

Agilent 600 NMR spectrometer

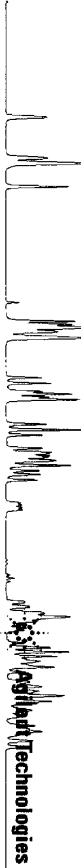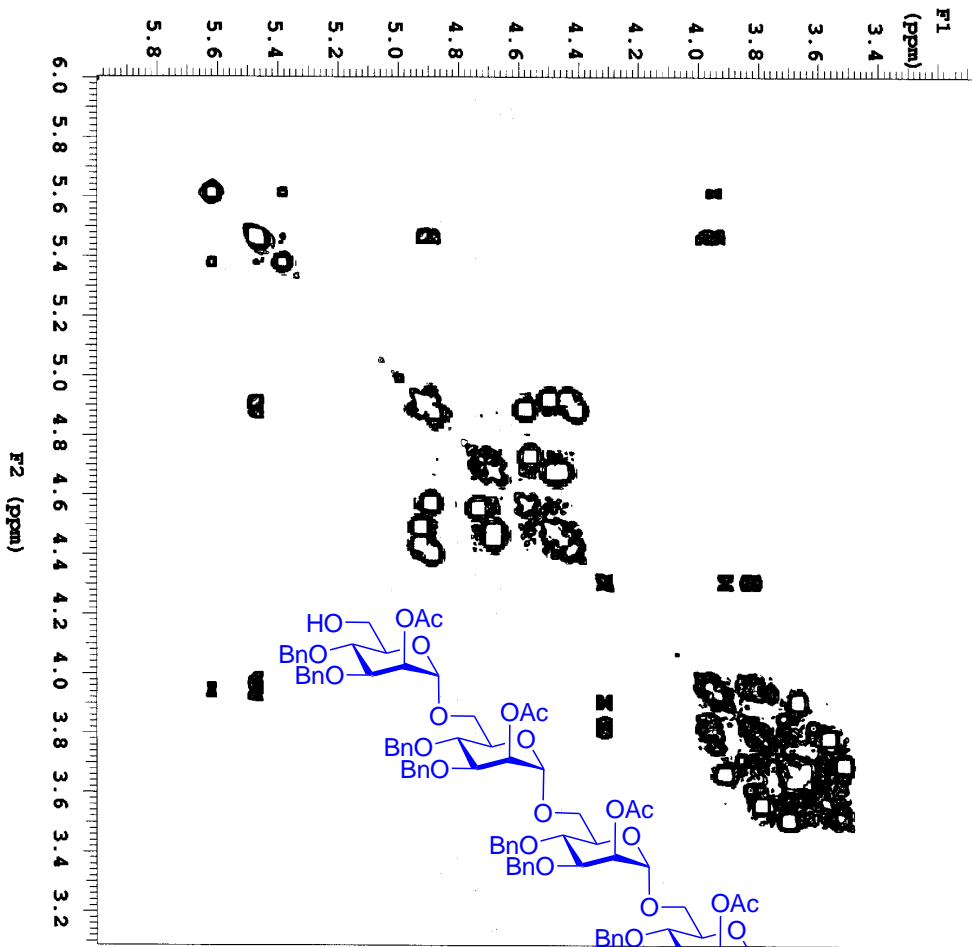

7  
<sup>1</sup>H-<sup>1</sup>H COSY  
600 MHz  
CDCl<sub>3</sub>

GJ130616

|    |         |        |       |
|----|---------|--------|-------|
| 1  | 14782.2 | 98.017 | -27.9 |
| 2  | 14772.6 | 97.954 | 13.2  |
| 3  | 11682.2 | 77.462 | 13.5  |
| 4  | 11341.1 | 75.200 | 21.4  |
| 5  | 11332.7 | 75.144 | -15.5 |
| 6  | 11306.9 | 74.973 | -24.7 |
| 7  | 10836.2 | 71.852 | 25.5  |
| 8  | 10796.9 | 71.592 | 14.2  |
| 9  | 10772.8 | 71.432 | 15.0  |
| 10 | 10766.1 | 71.387 | -27.5 |
| 11 | 10727.9 | 71.134 | -14.7 |
| 12 | 10721.8 | 71.094 | 15.5  |
| 13 | 10289.2 | 68.226 | -12.3 |
| 14 | 10275.2 | 68.133 | 12.3  |
| 15 | 10256.1 | 68.006 | 16.0  |
| 16 | 9341.7  | 61.943 | -17.5 |

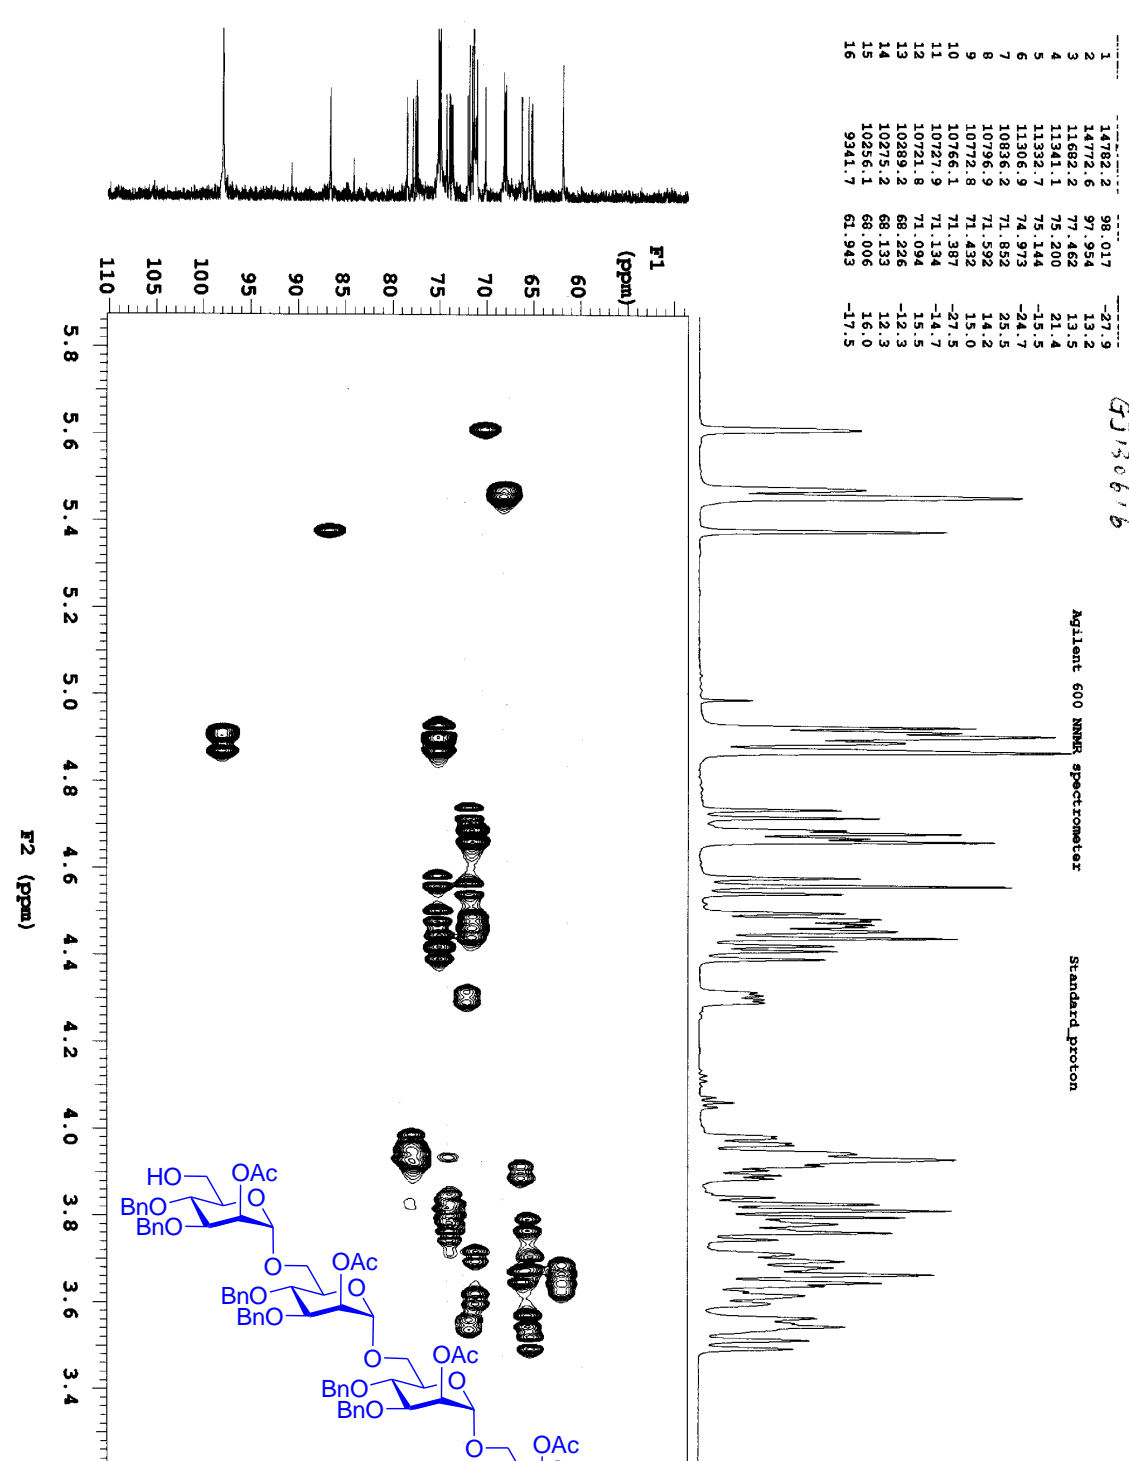

7  
<sup>1</sup>H-<sup>13</sup>C HMQC  
 600/150 MHz  
 CDCl<sub>3</sub>

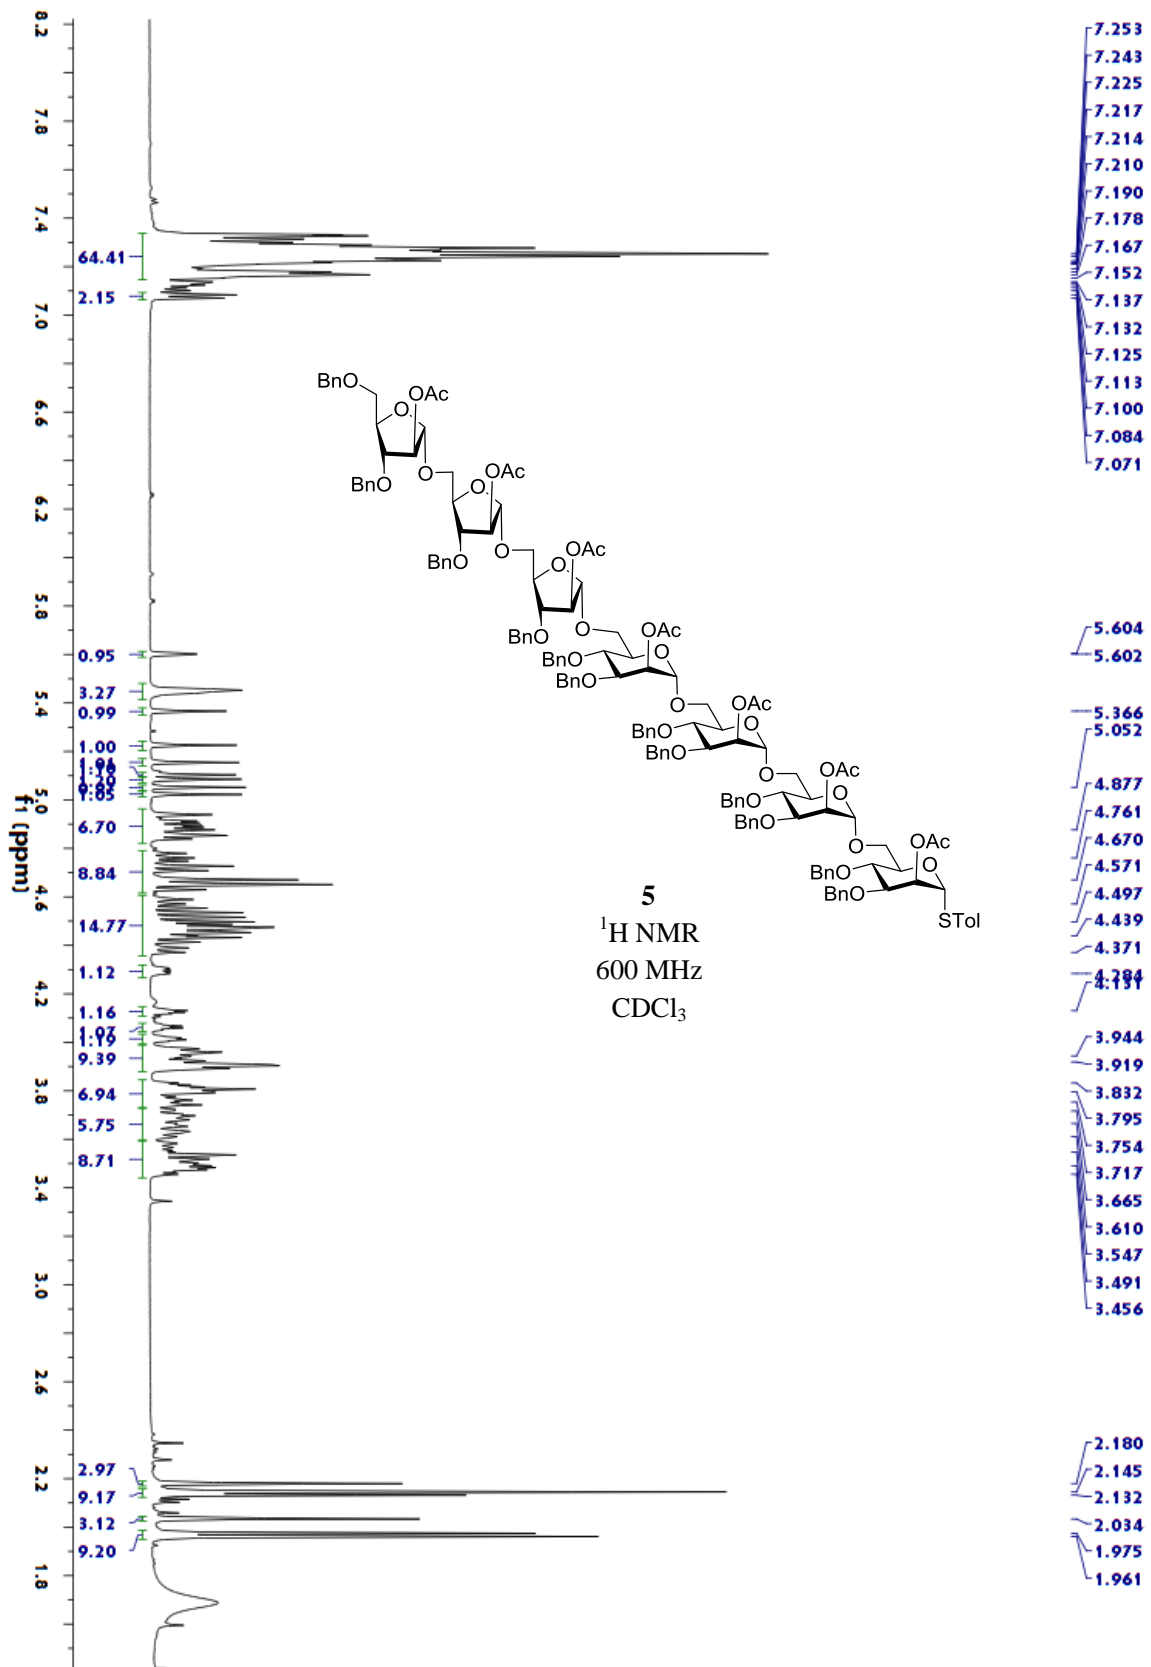

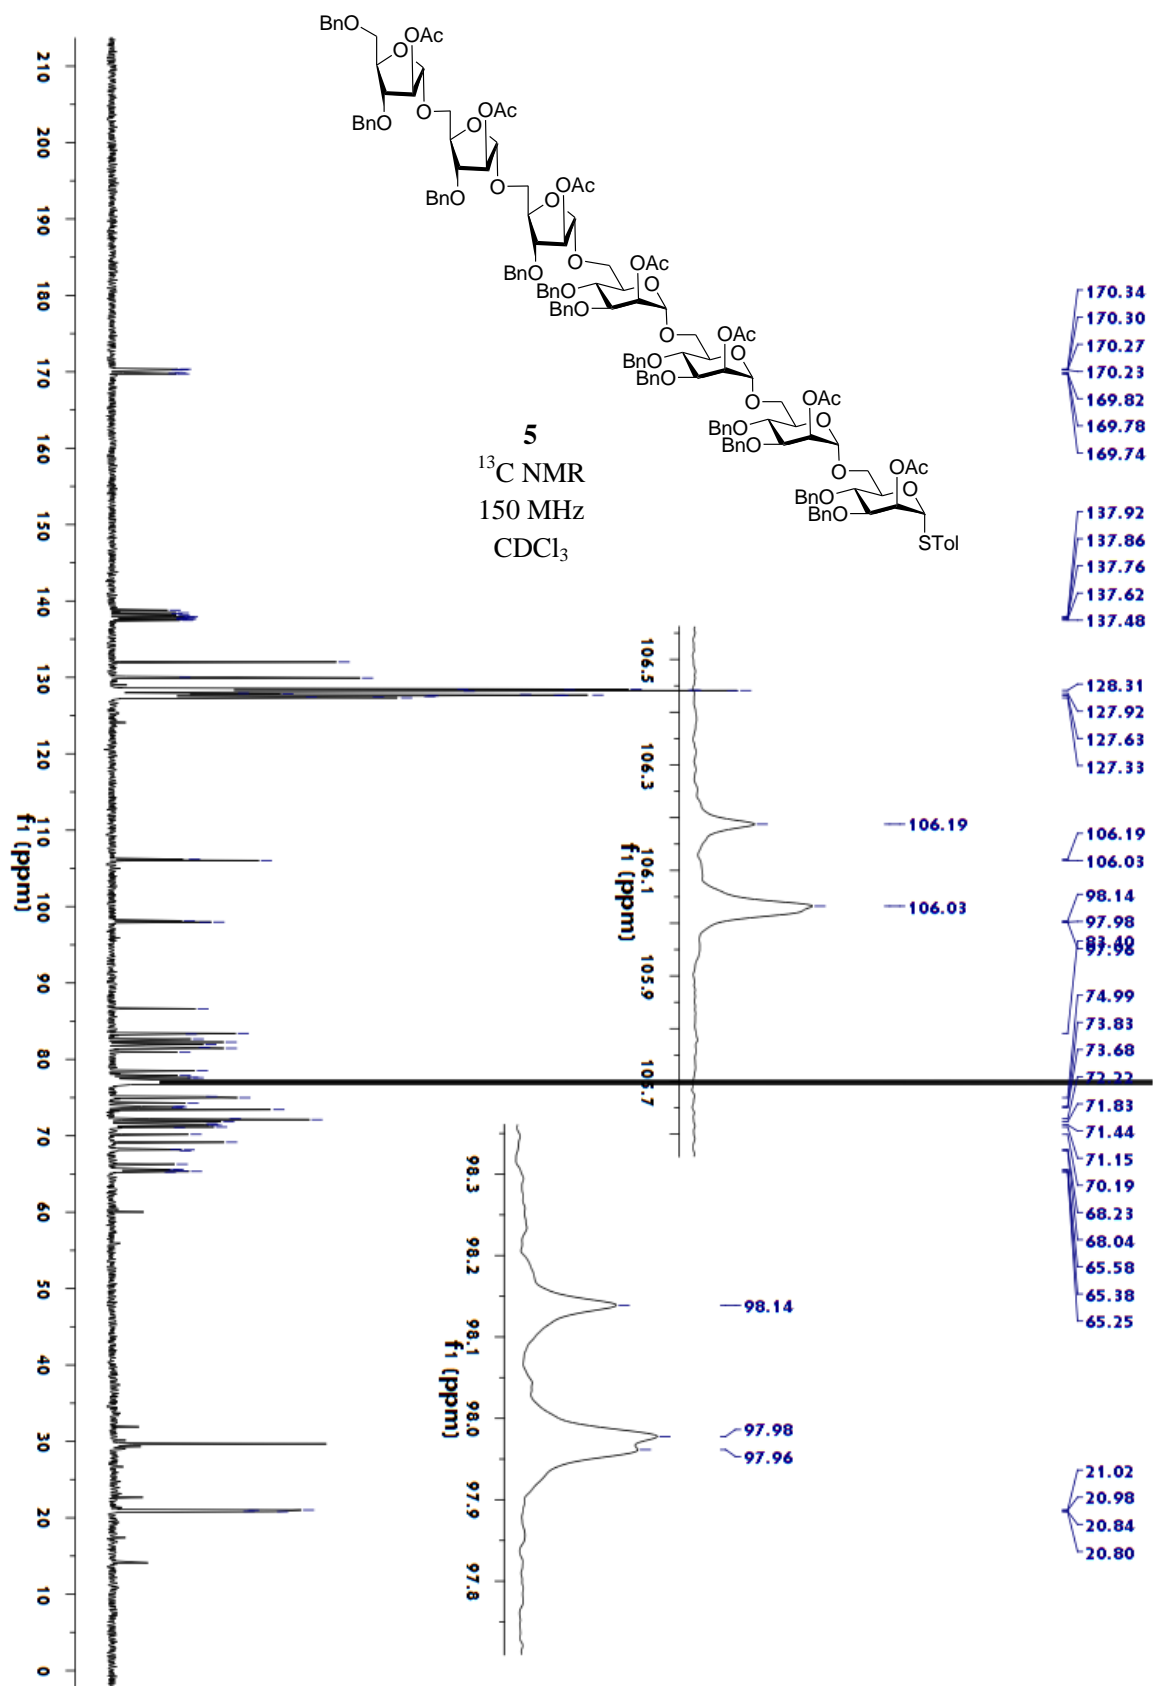

07130714

Agilent 600 NMR spectrometer

Sample Name:  
Data Collected on:  
a60-vmr600  
Archive directory:  
/home/vmr1/vmrays/probes/probe\_calibs  
Sample directory:

Fidfile: gcossy

Pulse Sequence: gcossy  
Solvent: cdcl3  
Data collected on: Jul 16 2013

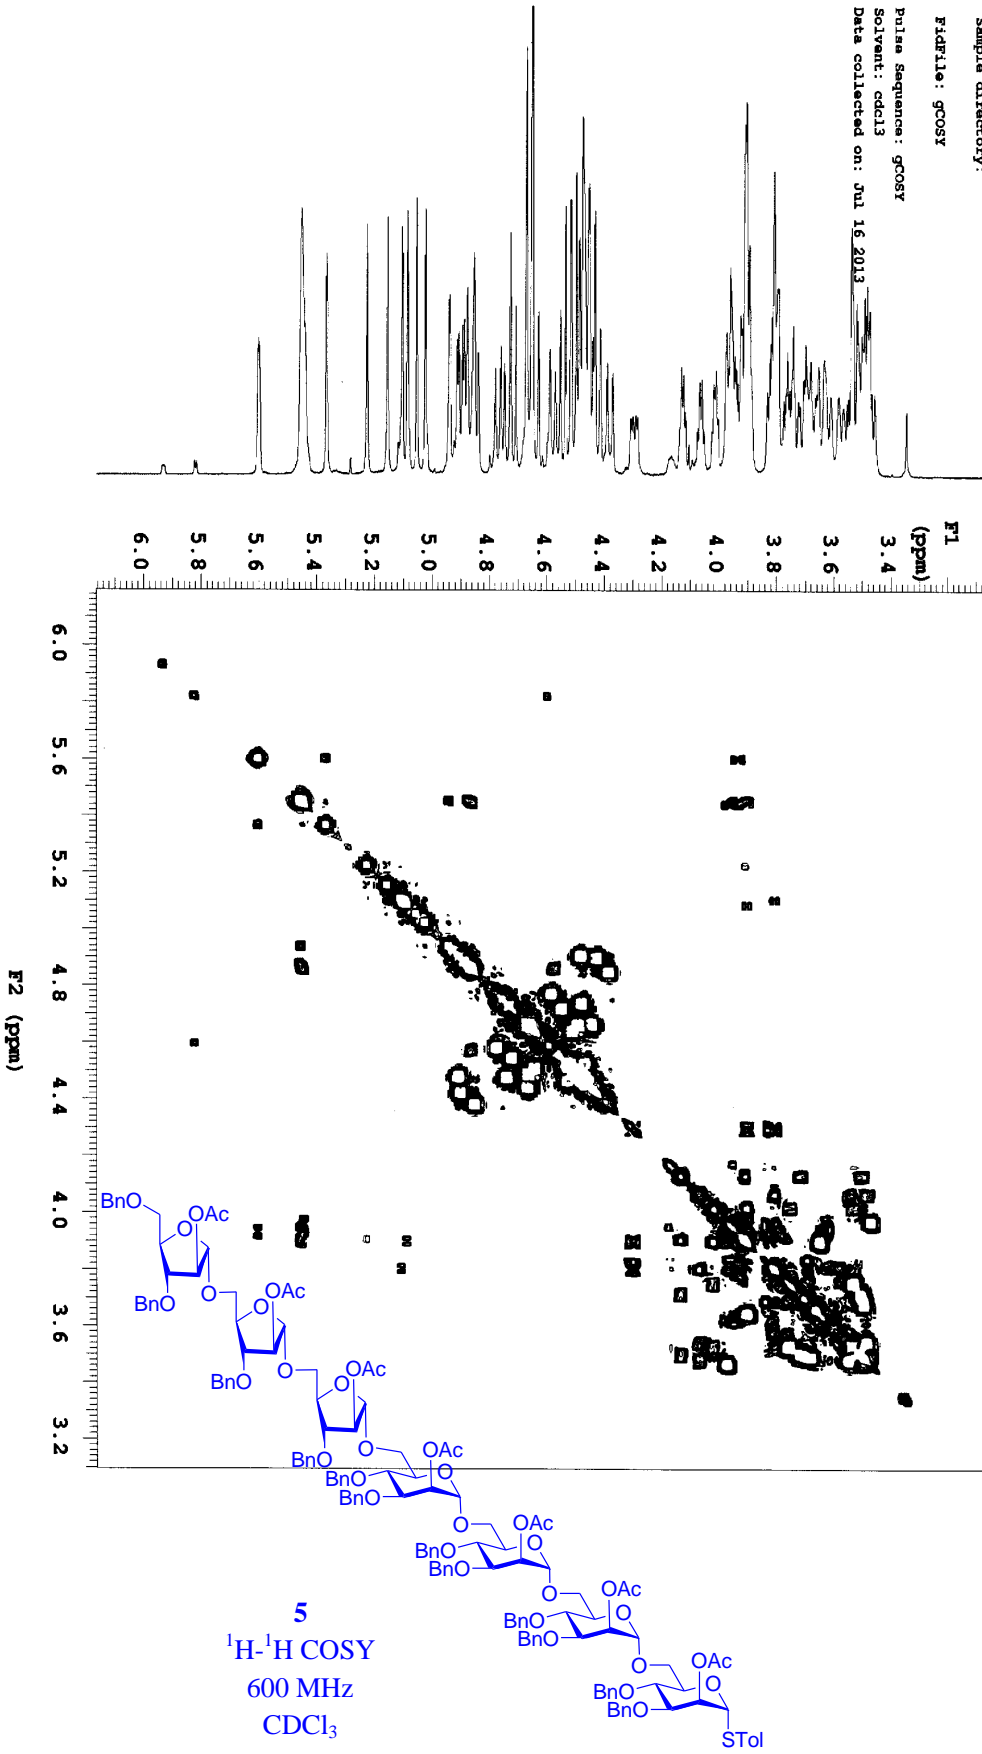

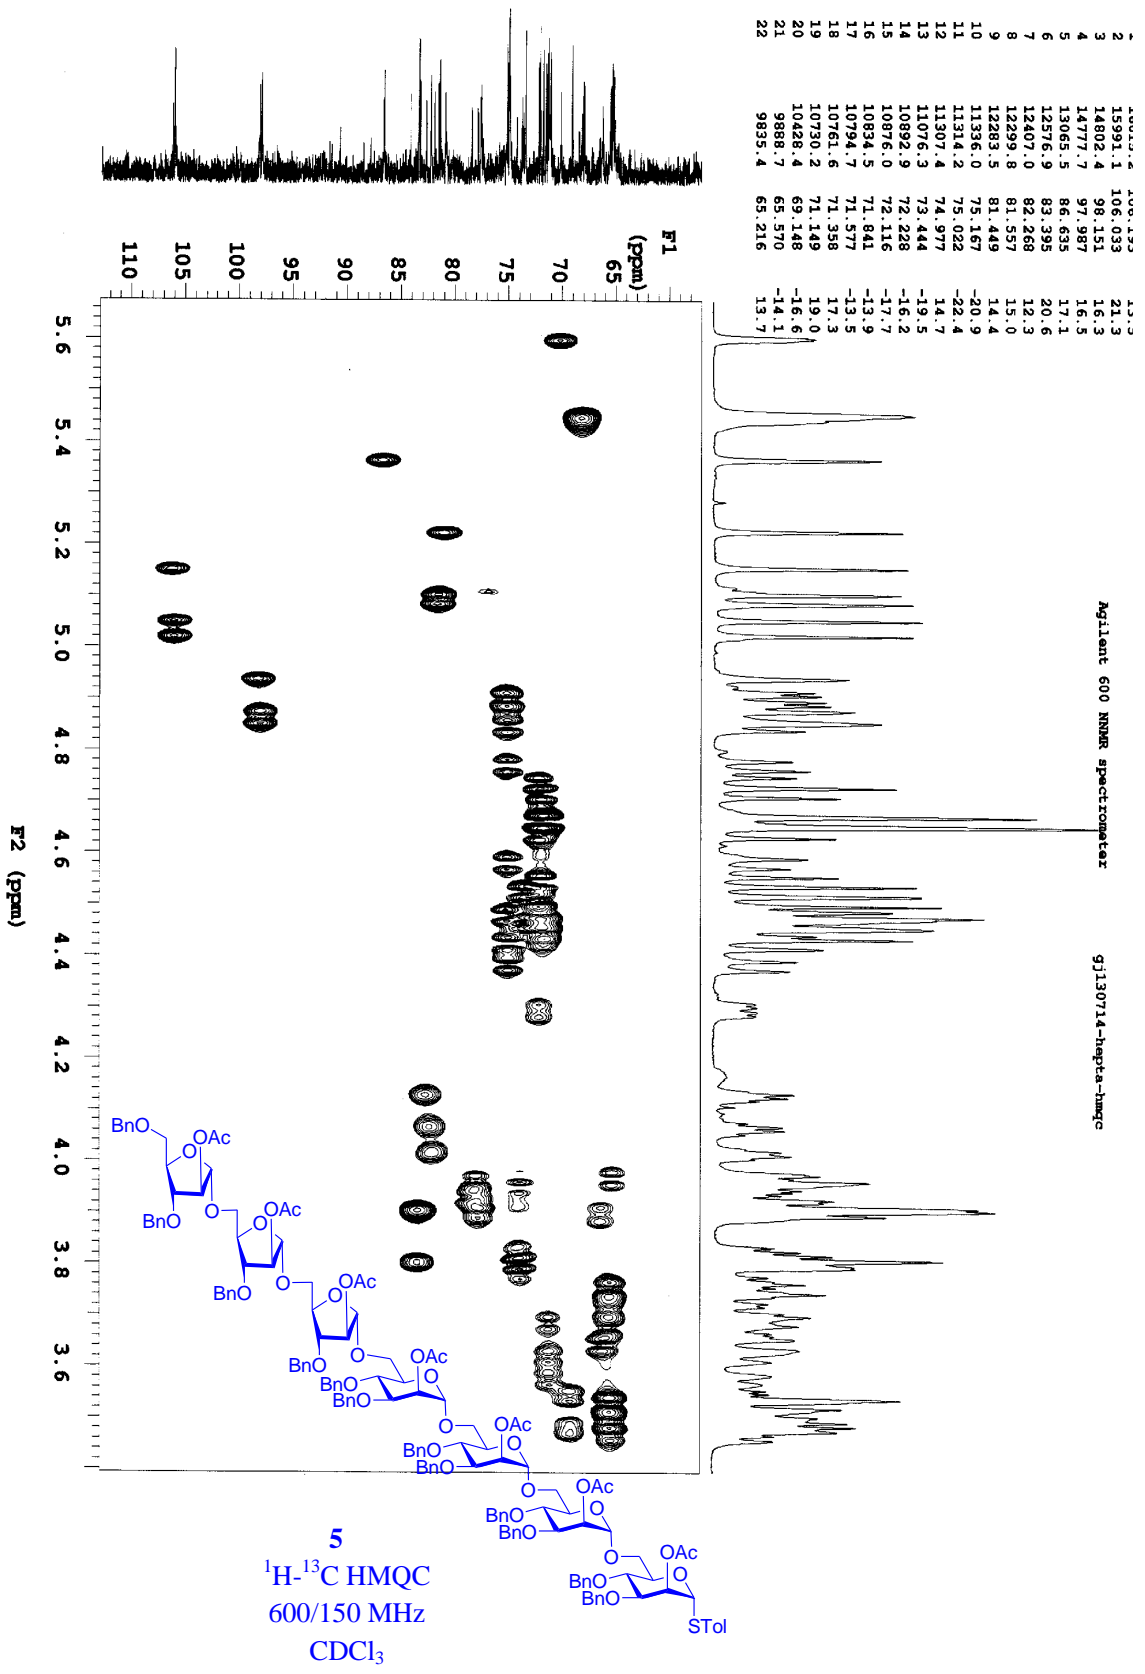

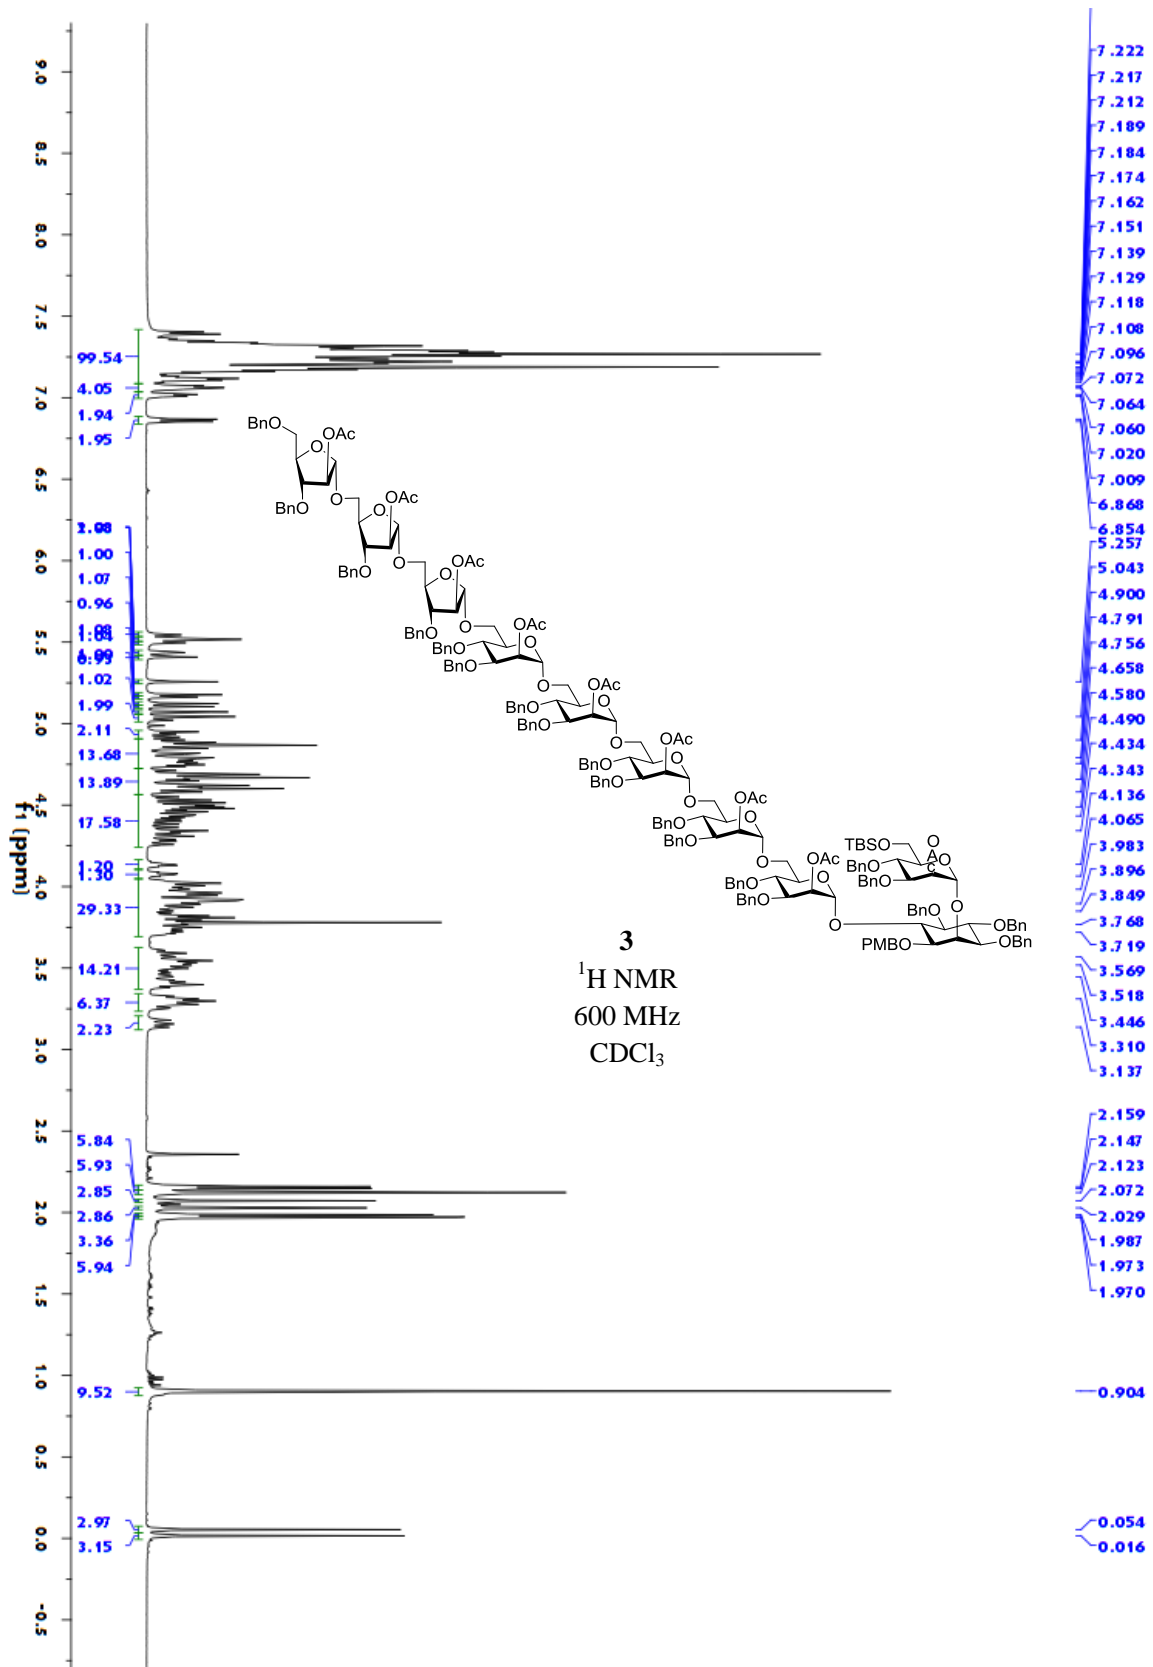

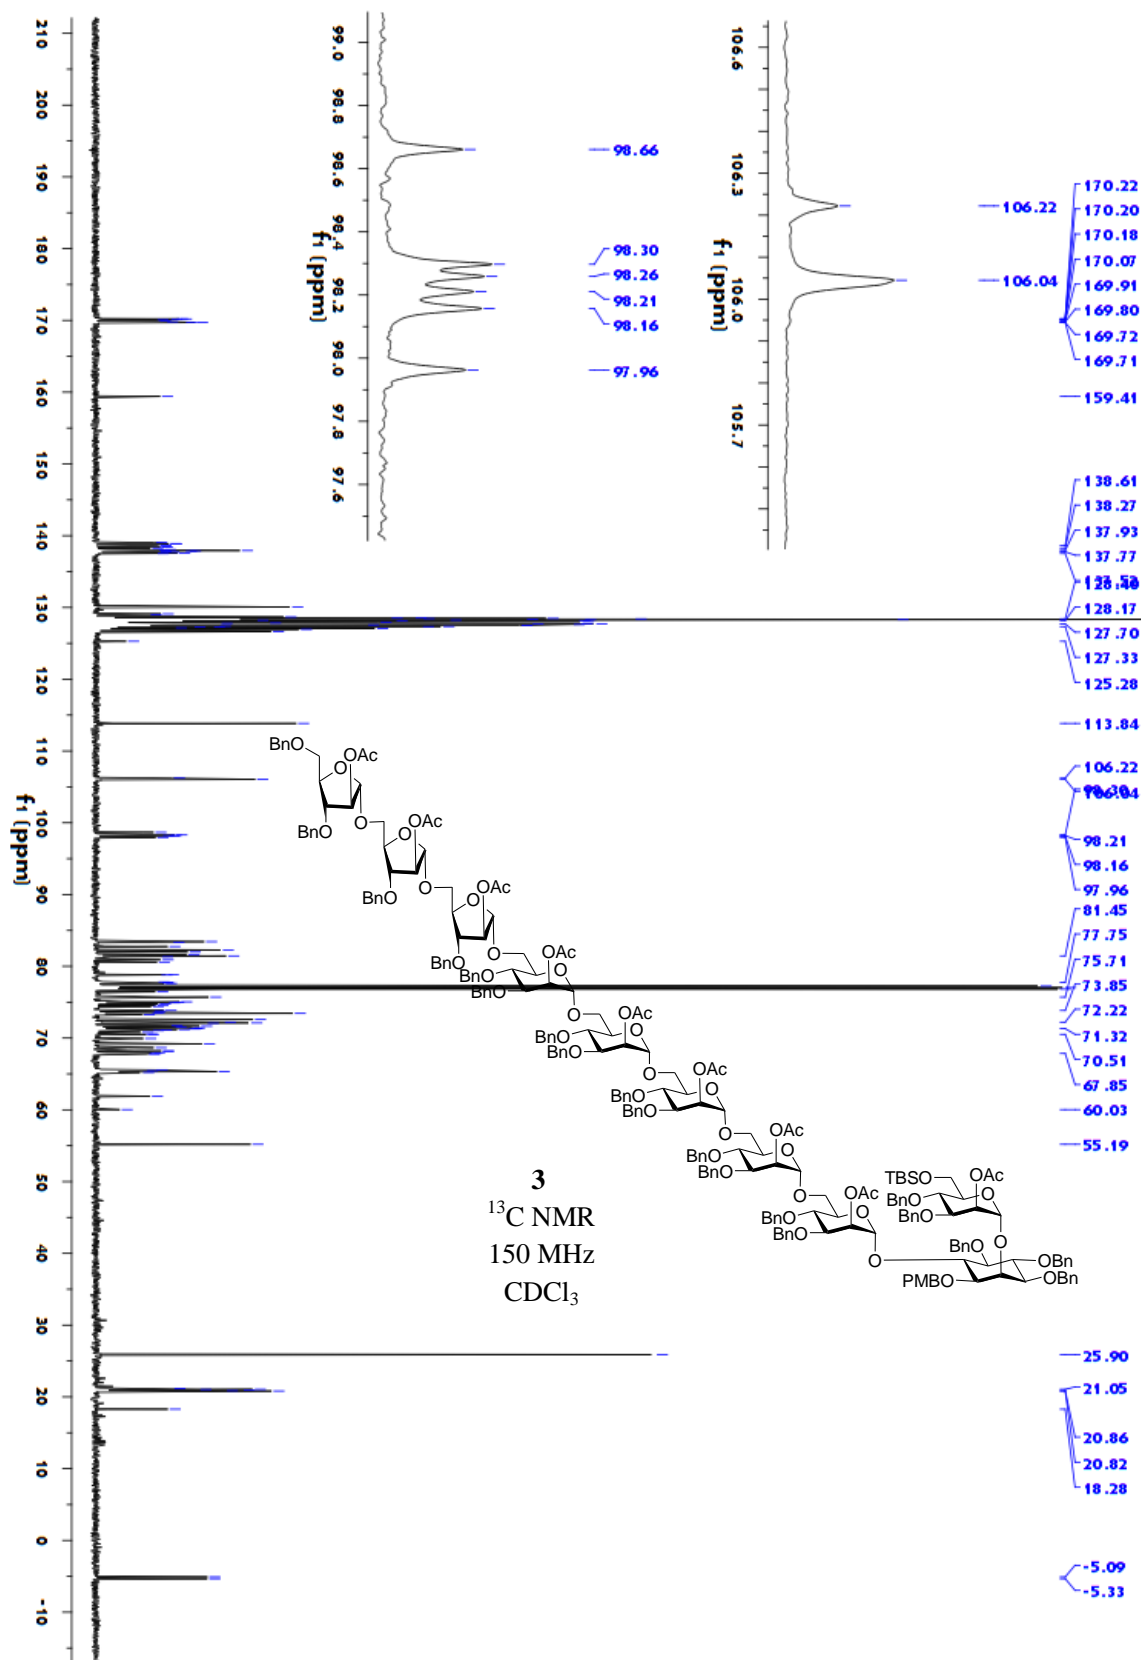



GJ130727

Sample Name:

Data Collected on:

4600-Vnmr600

Archive directory:

/home/vnmr1/vnmrsys/probes/probe\_calibs

Sample directory:

F2dirfile: gc051

Pulse Sequence: gc051

Solvent: cdcl3

Data collected on: Jul 30 2013

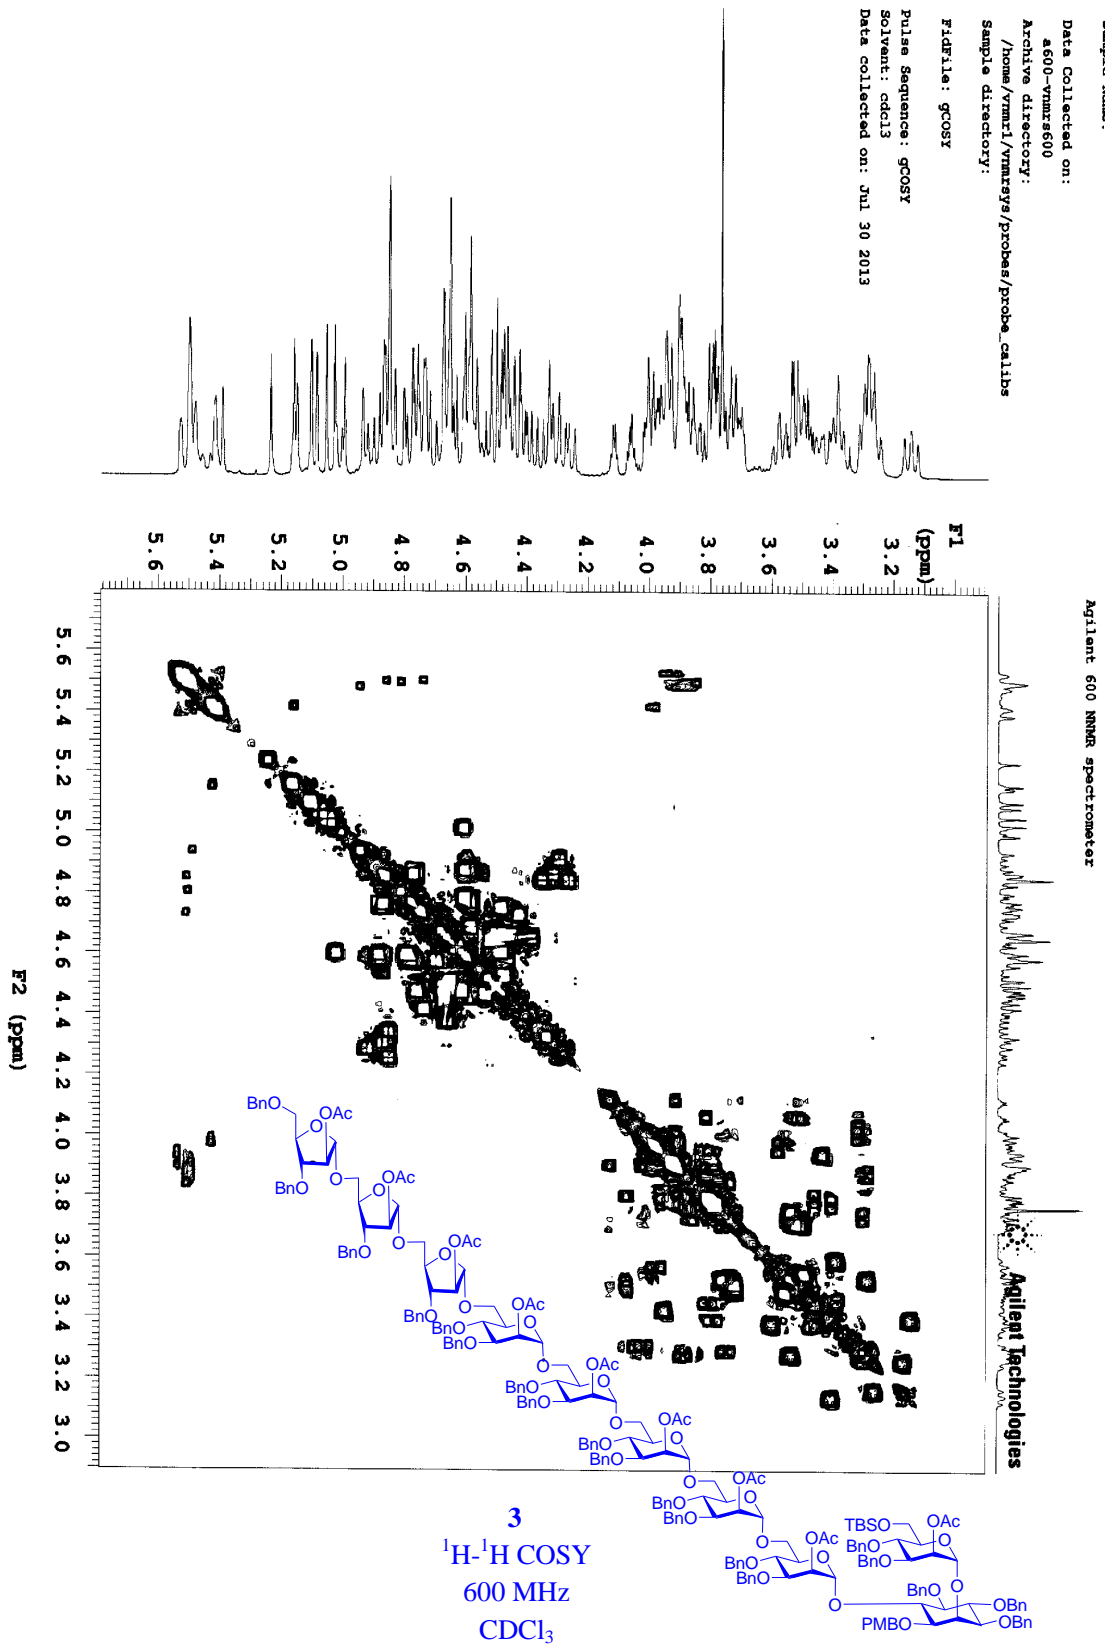

G5130727

|    |         |         |       |
|----|---------|---------|-------|
| 1  | 18975.0 | 125.819 | -28.0 |
| 2  | 18951.4 | 125.662 | 12.6  |
| 3  | 17983.1 | 119.242 | 21.1  |
| 4  | 17563.0 | 116.456 | 13.1  |
| 5  | 17152.9 | 113.737 | 12.3  |
| 6  | 16615.5 | 110.173 | -12.3 |
| 7  | 15683.8 | 90.734  | -22.6 |
| 8  | 12891.9 | 84.157  | 31.5  |
| 9  | 12663.3 | 81.315  | 12.5  |
| 10 | 11821.3 | 75.732  | -13.4 |
| 11 | 11322.0 | 75.074  | -14.0 |
| 12 | 11037.6 | 73.188  | -12.7 |
| 13 | 10754.3 | 71.309  | -13.5 |
| 14 | 10430.0 | 69.159  | -14.7 |
| 15 | 9852.8  | 65.332  | -13.1 |
| 16 | 8803.7  | 58.376  | 13.1  |

Agilent 600 NMR spectrometer  
Standard, proton

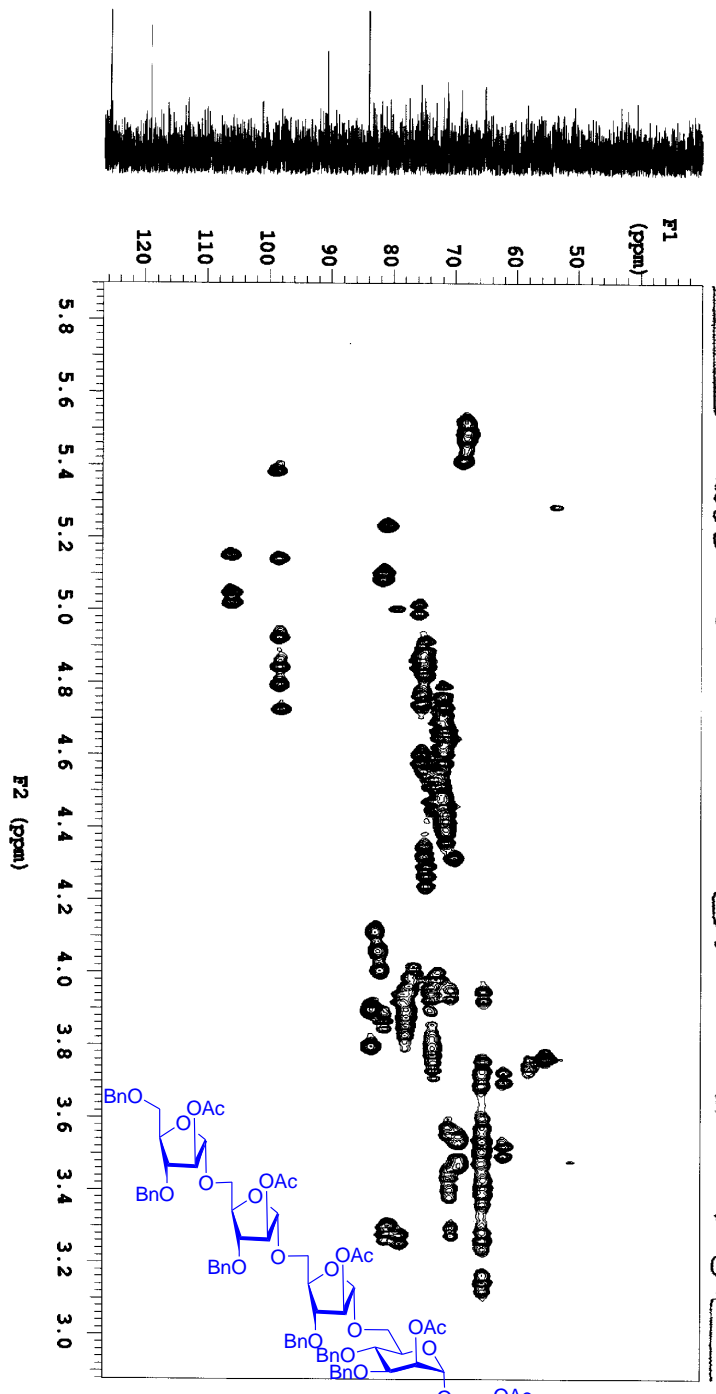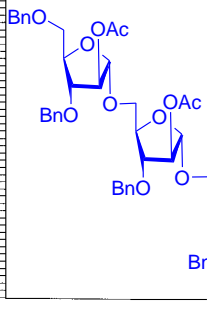

3  
<sup>1</sup>H-<sup>13</sup>C HMQC  
600/150 MHz  
CDCl<sub>3</sub>

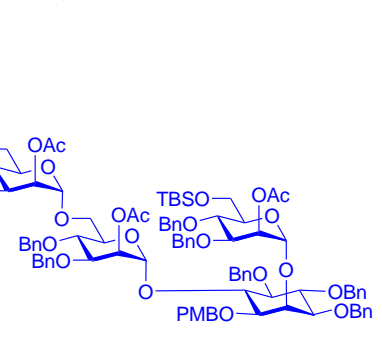

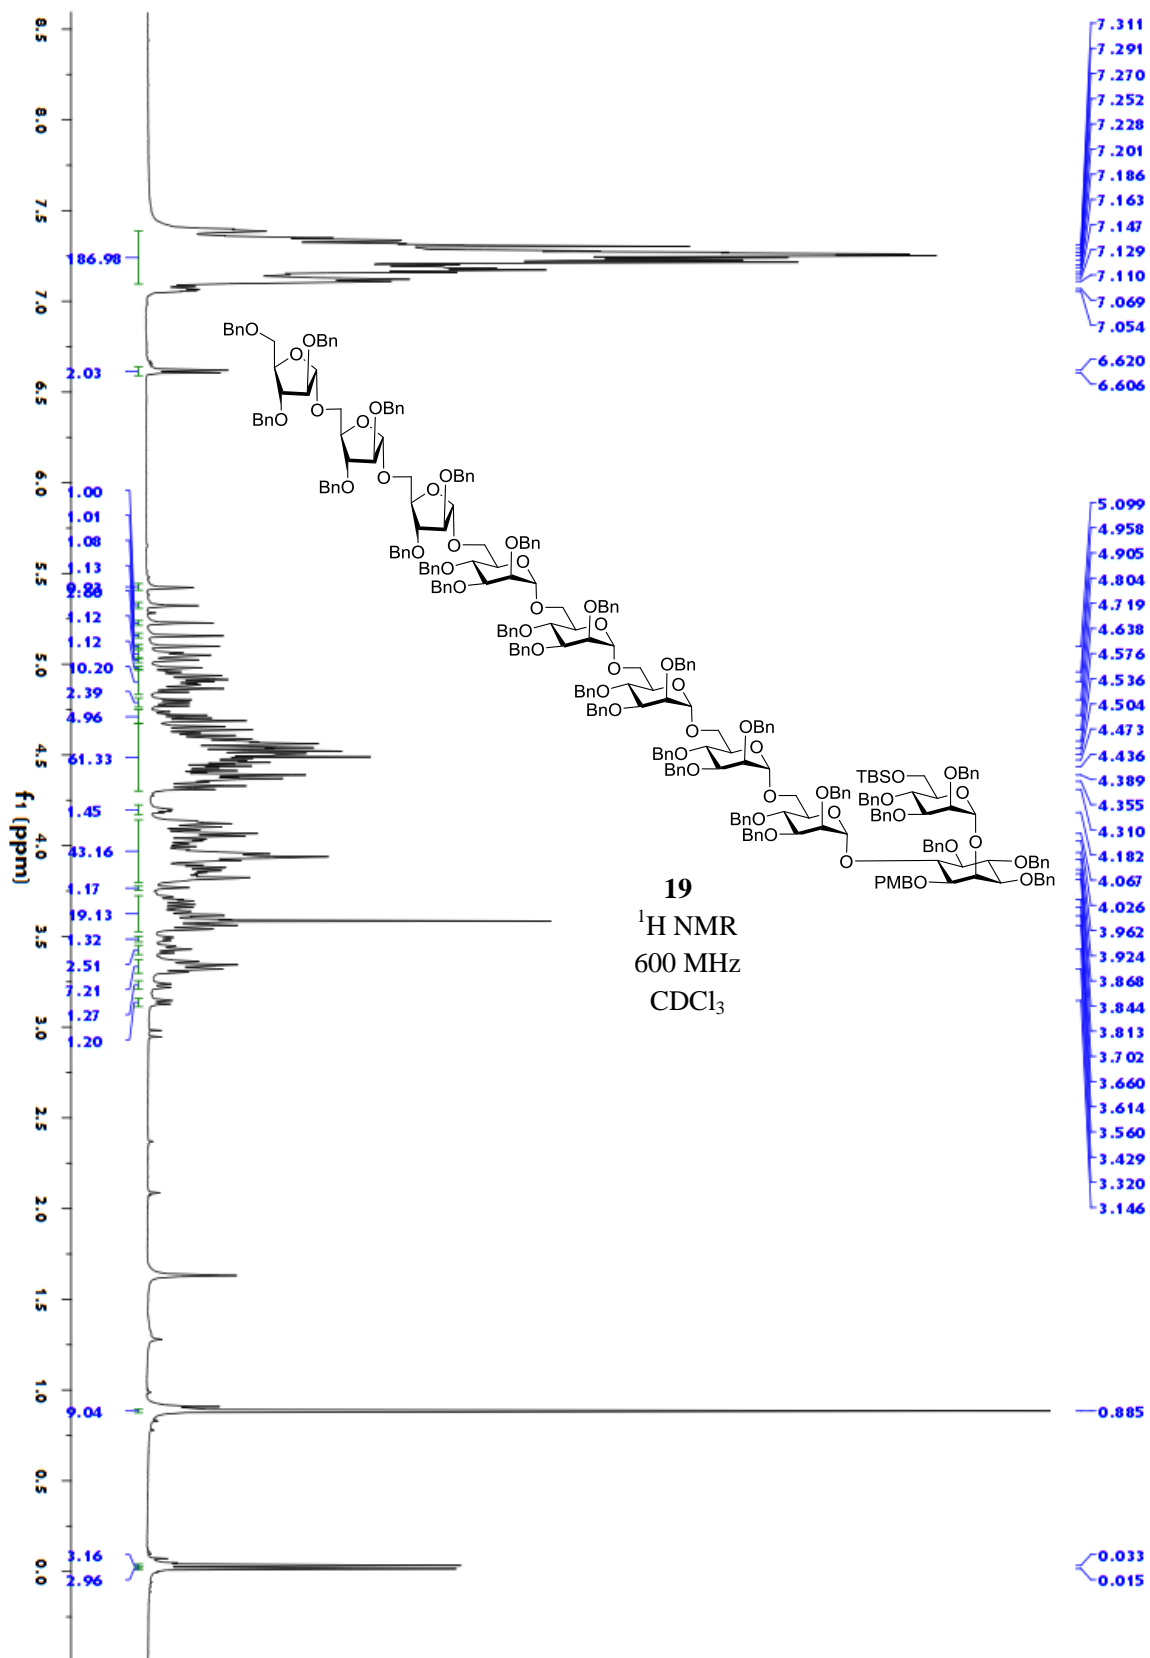

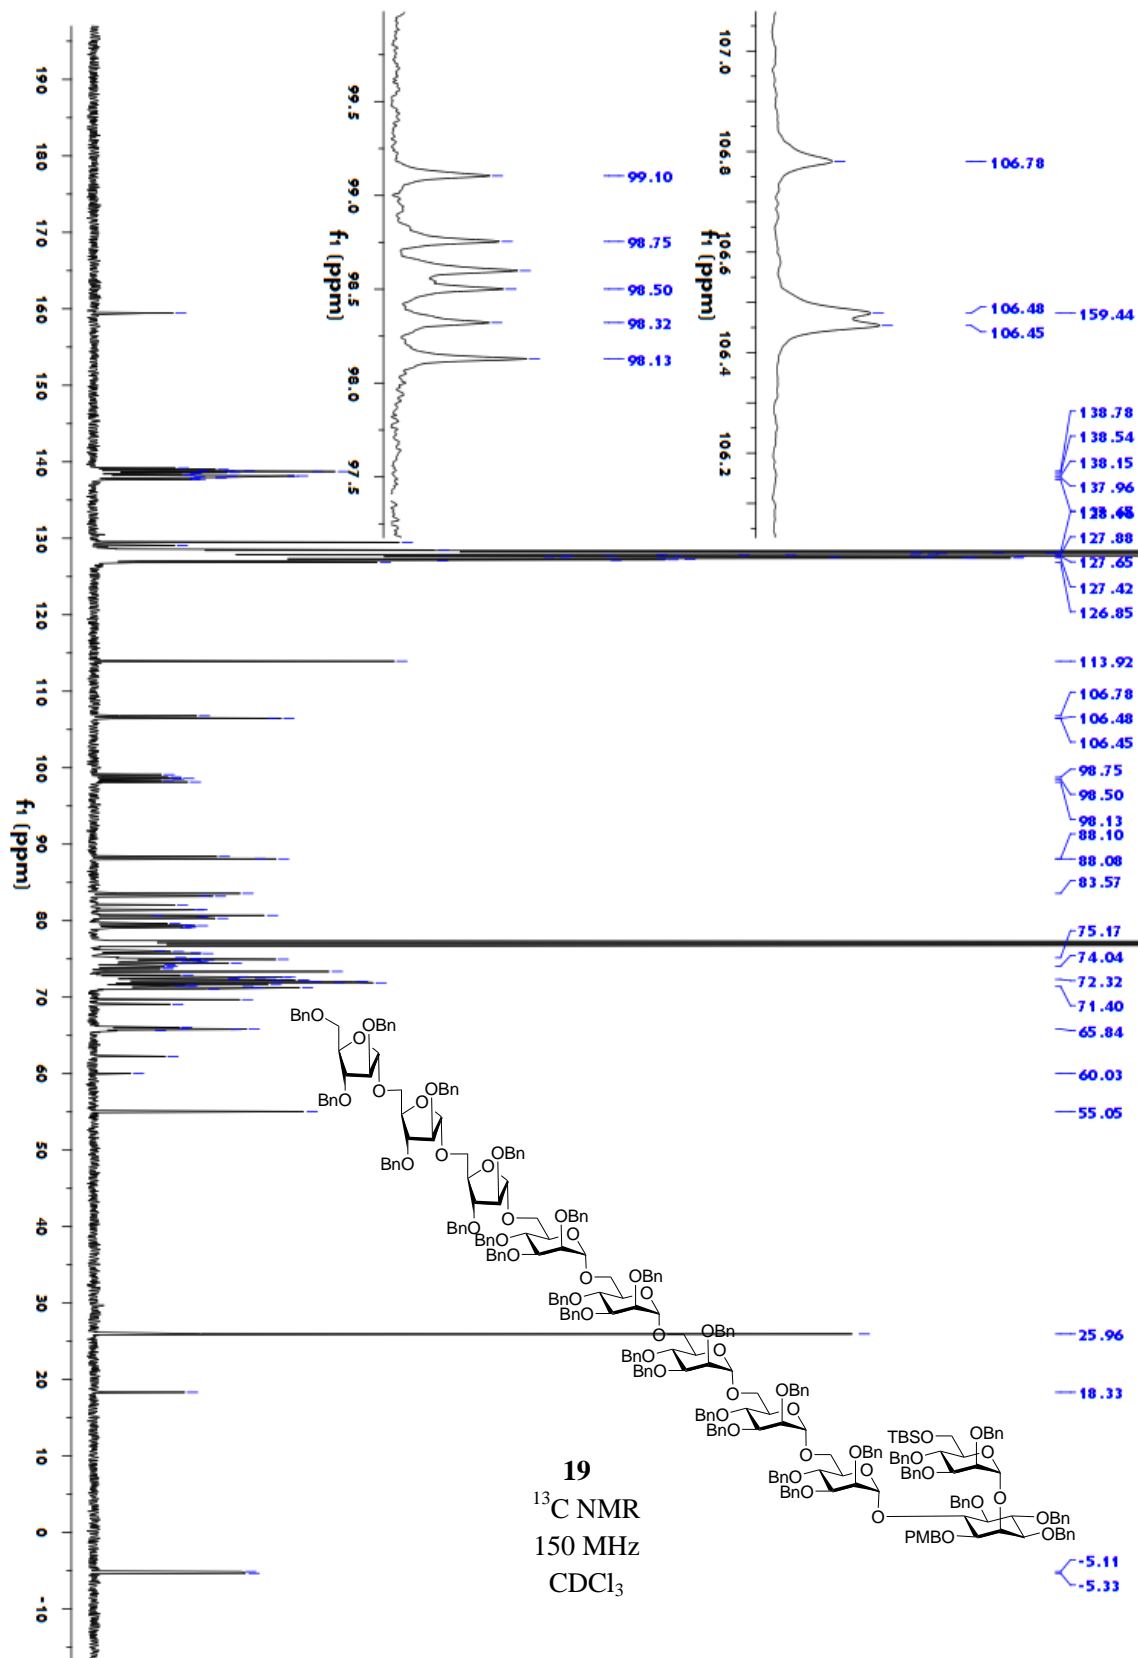

GJ130810

Sample Name:

Data Collected on:

4600-vmr600

Archive directory:

/home/vmr1/vmrays/probes/probe\_caliba

Sample directory:

F1:file: gcosy

Pulse Sequence: gcosy

Solvent: cdcl3

Data collected on: Sep 10 2013

Agilent 600 NMR spectrometer

Agilent Technologies

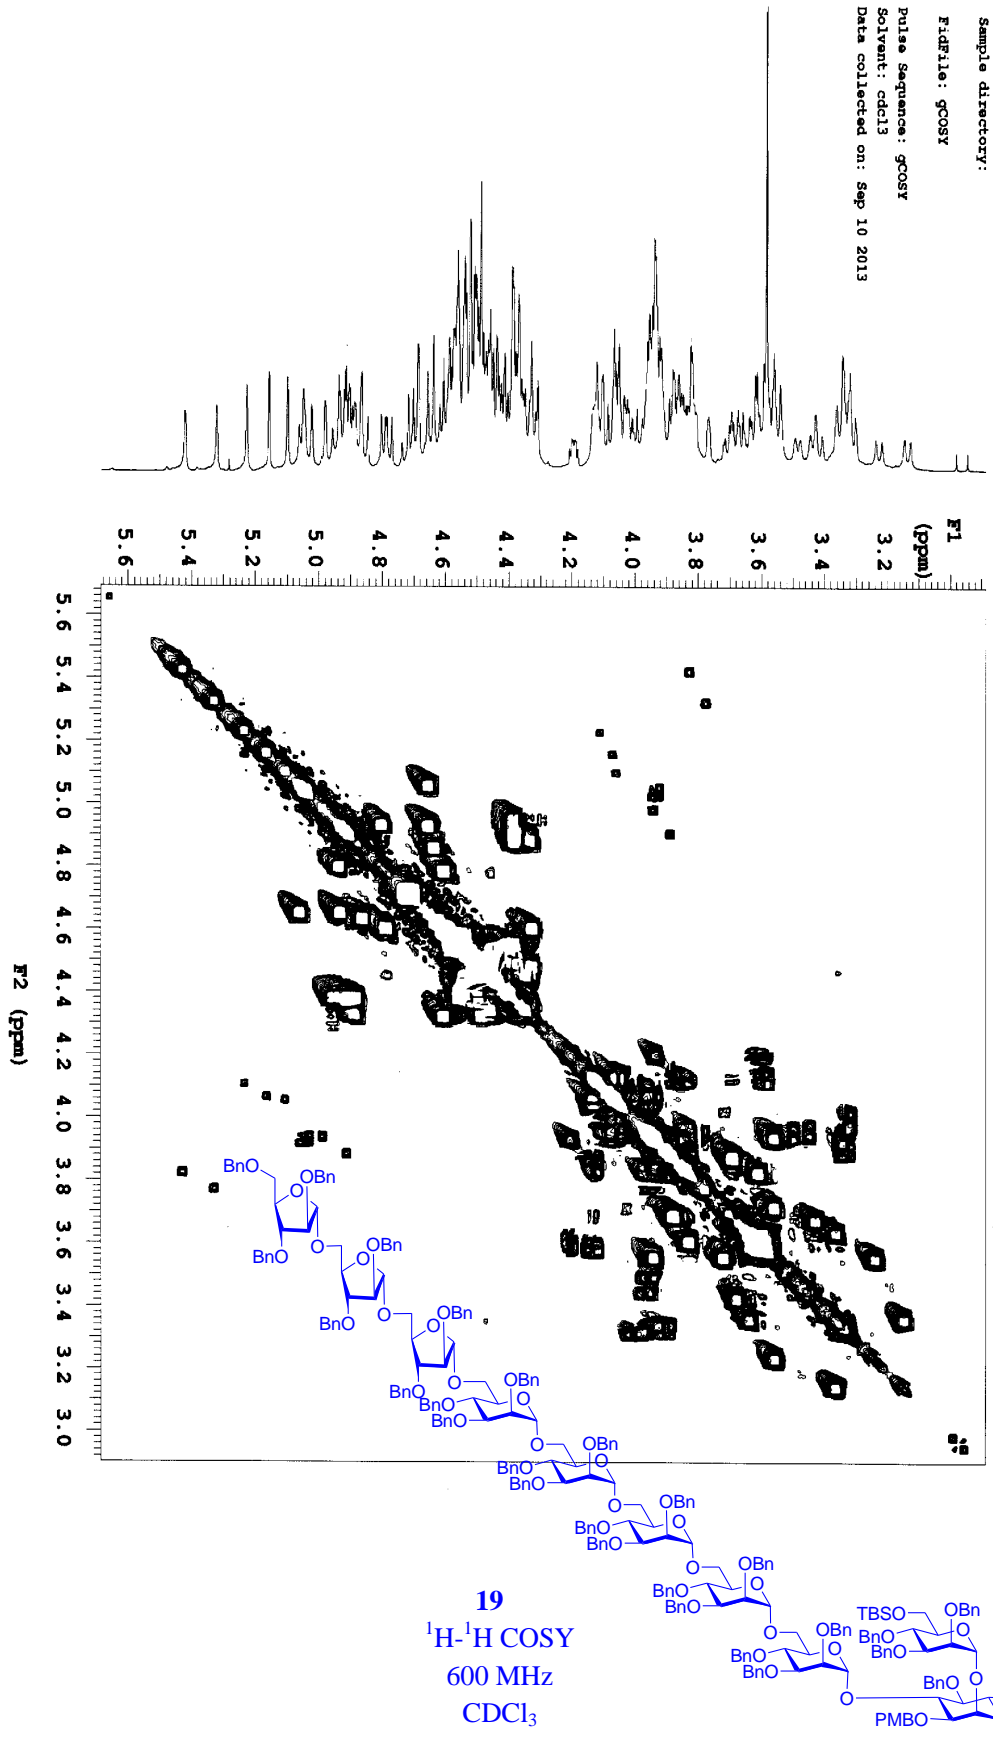

**19**  
 $^1\text{H}-^1\text{H}$  COSY  
600 MHz  
 $\text{CDCl}_3$

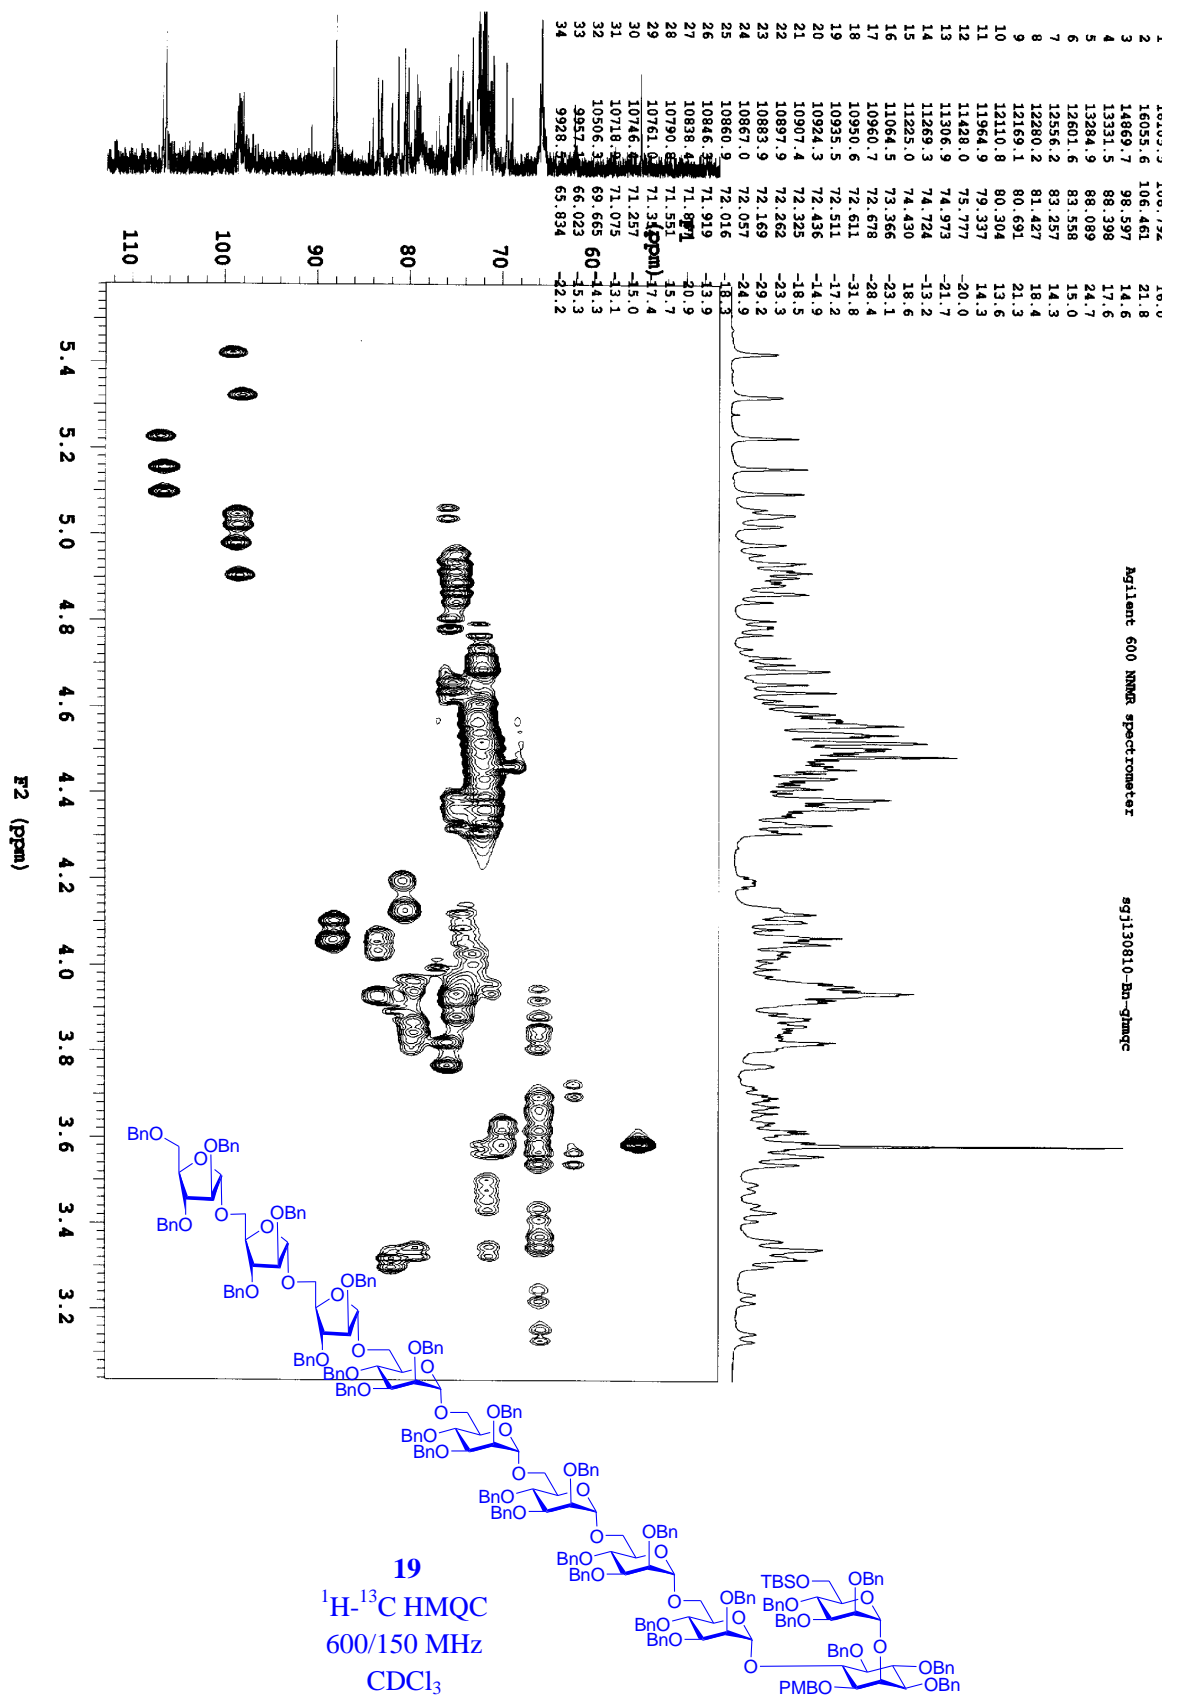

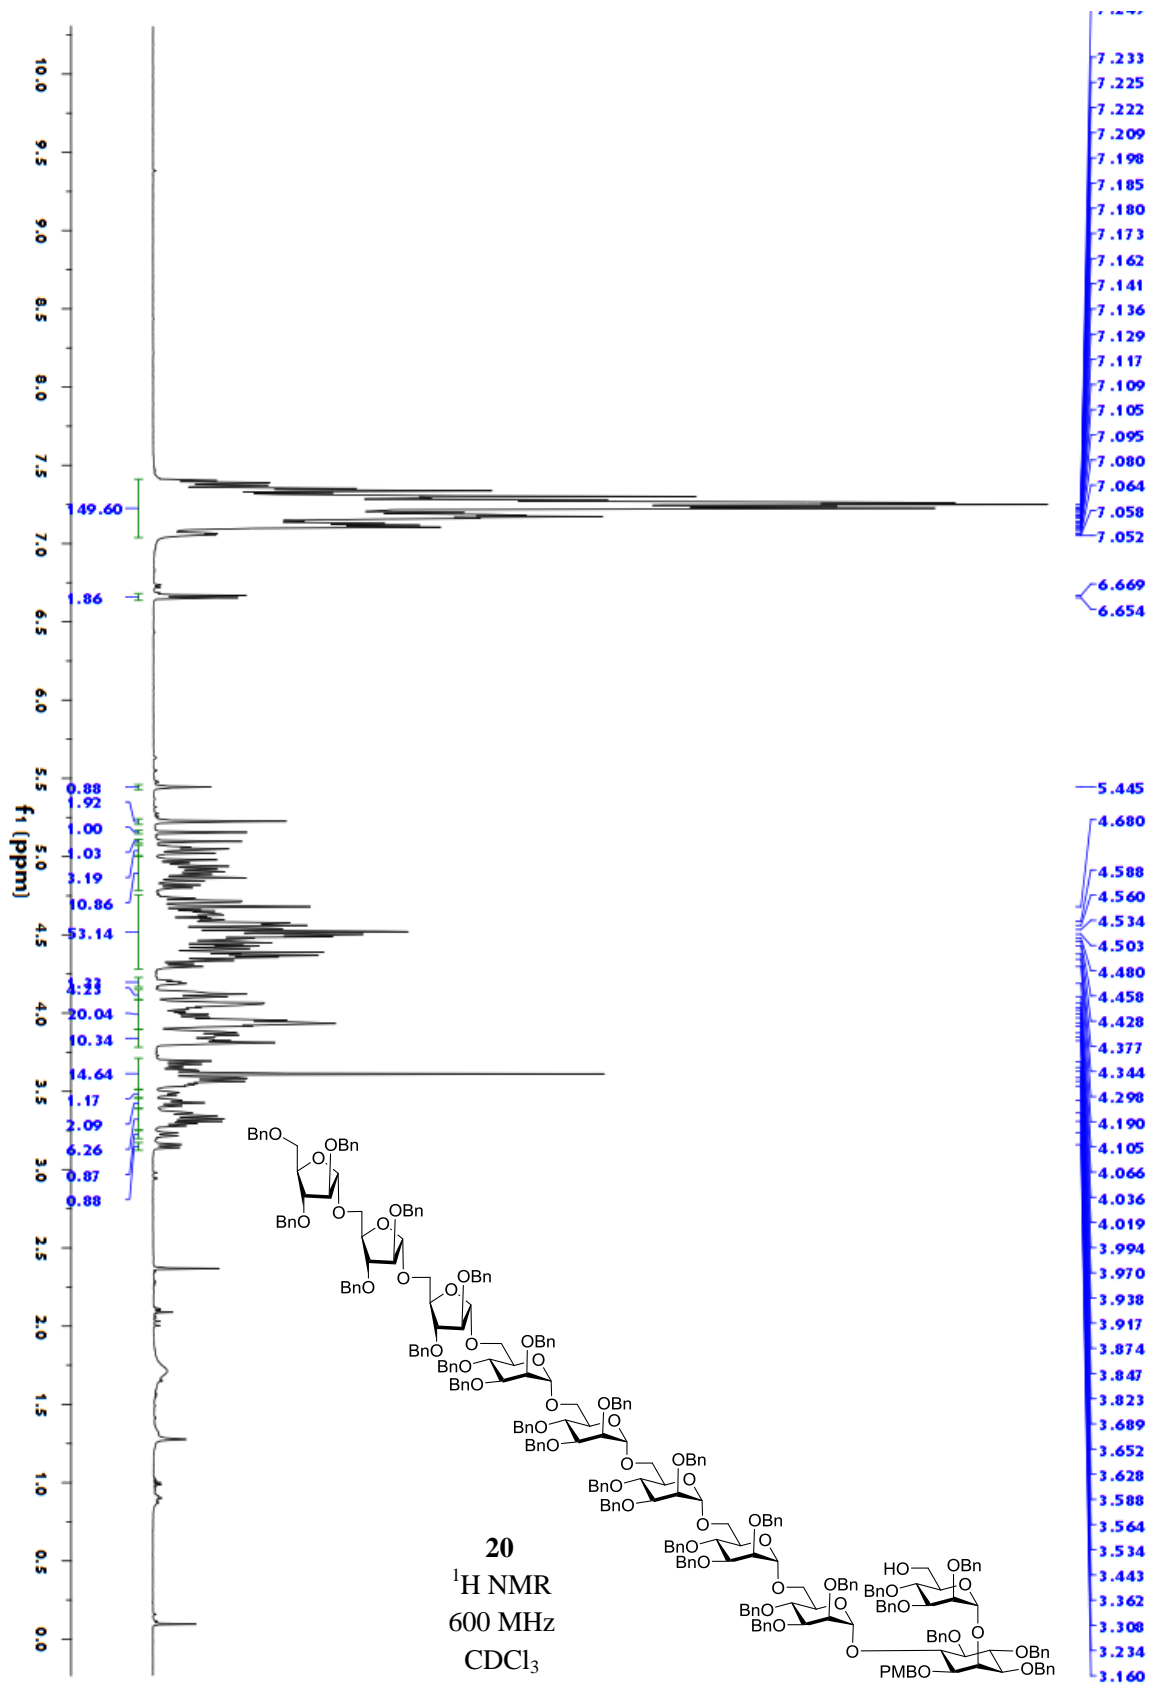

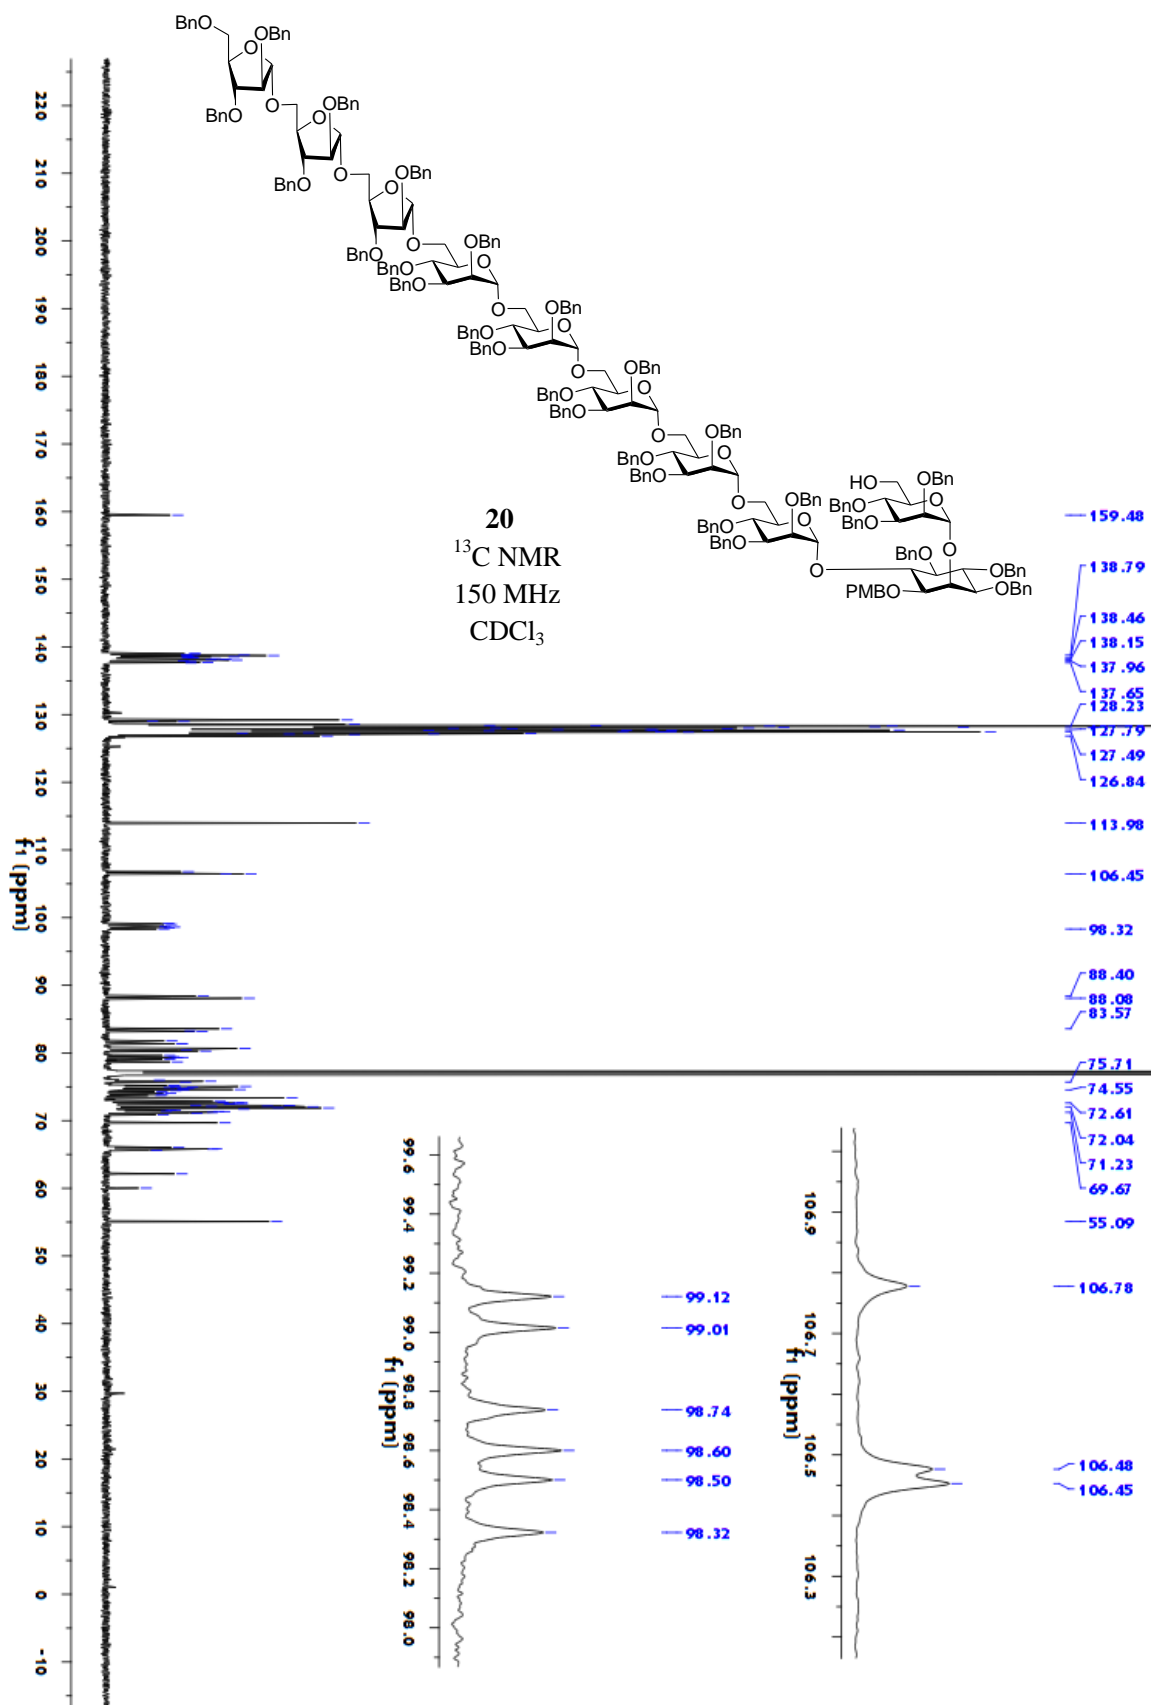



Sample Name:  
 Data Collected on:  
 4600-vnmr6600  
 Archive directory:  
 /home/vnmr1/vnmr3ys/probes/probe\_calibs  
 Sample directory:  
 FIDFile: gcOSY  
 Pulse Sequence: gcOSY  
 Solvent: cdcl3  
 Data collected on: Sep 2 2013

Agilent 600 NMR spectrometer

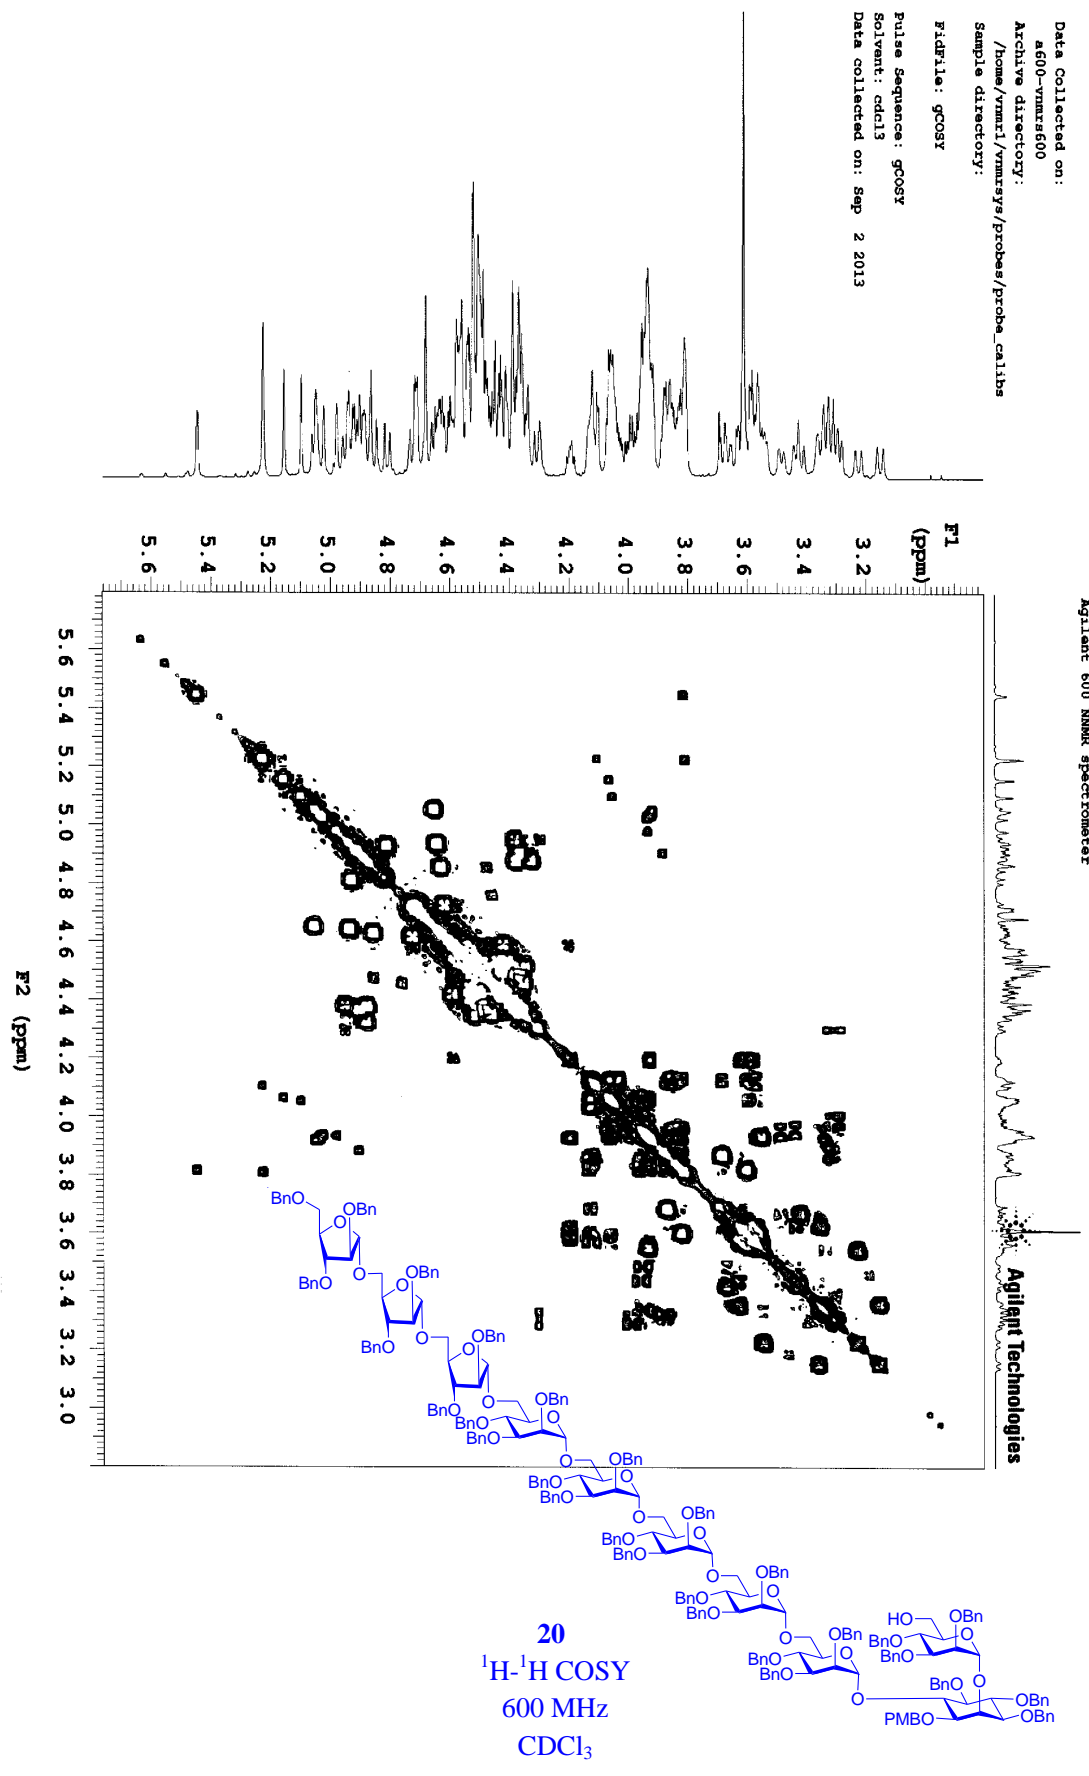

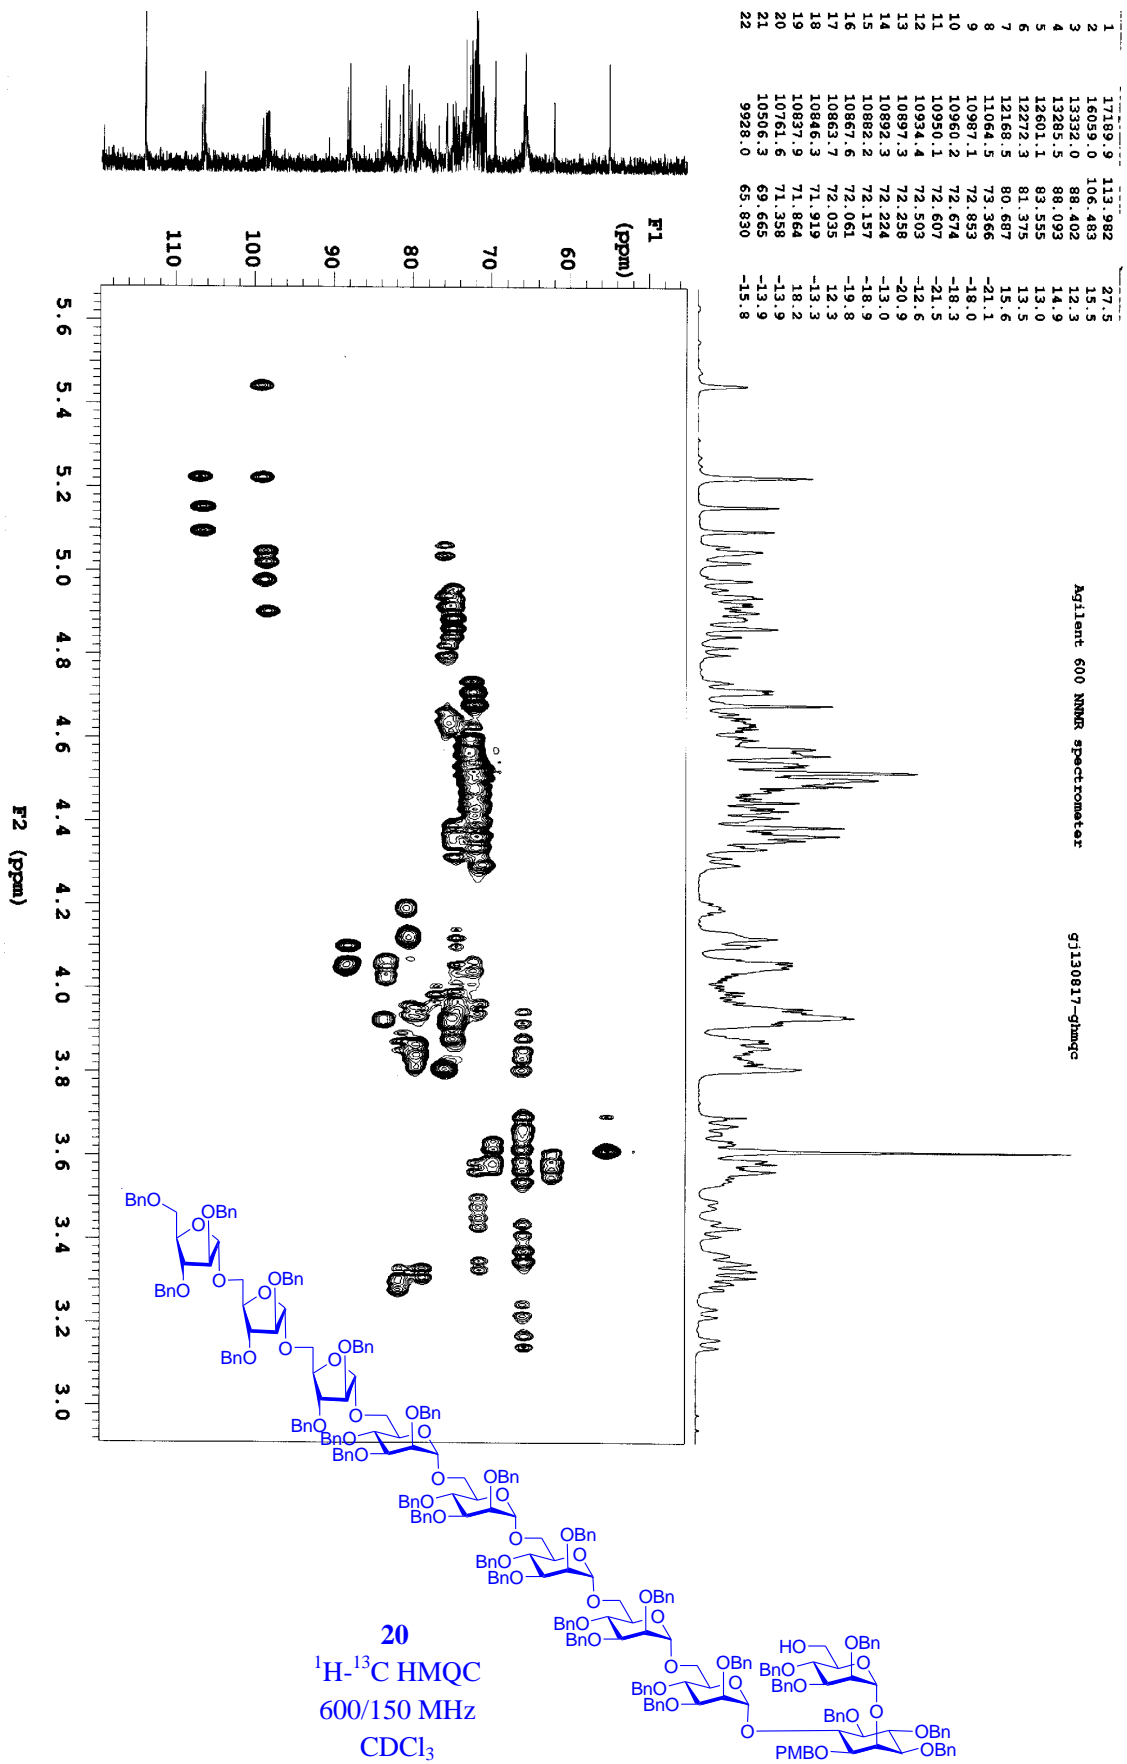

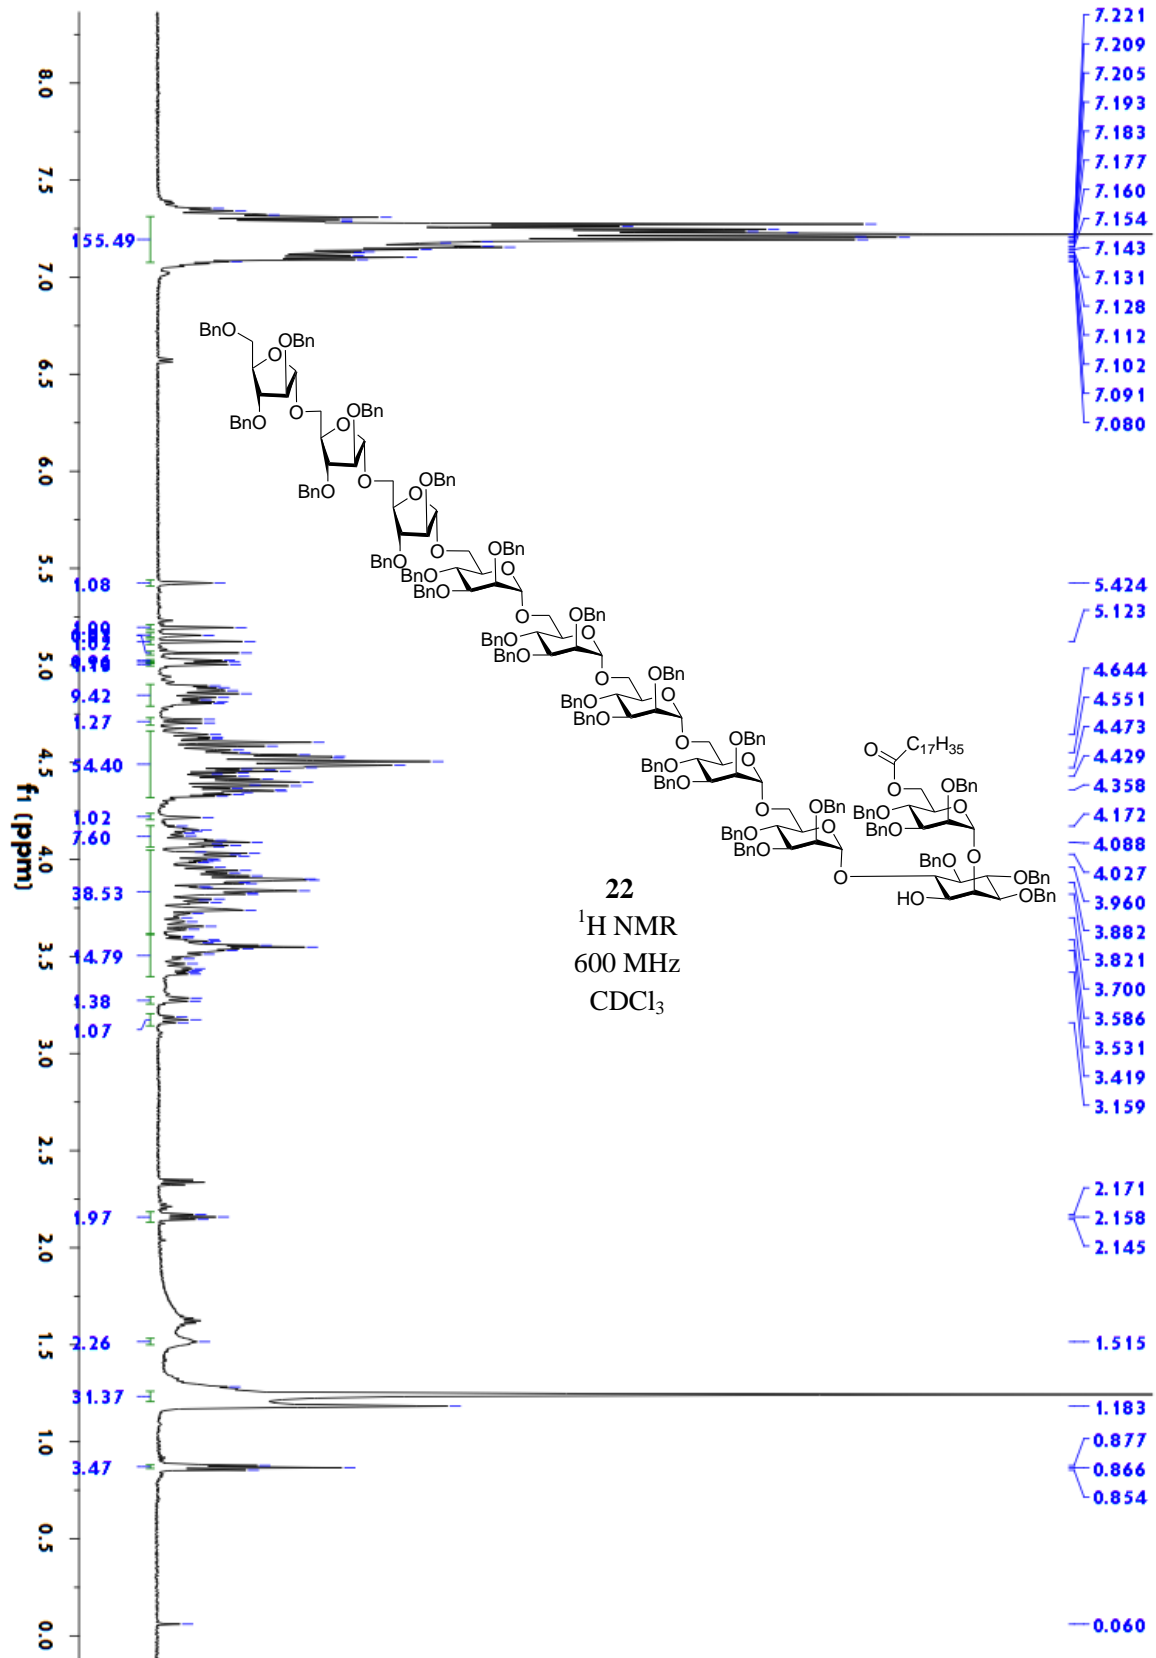

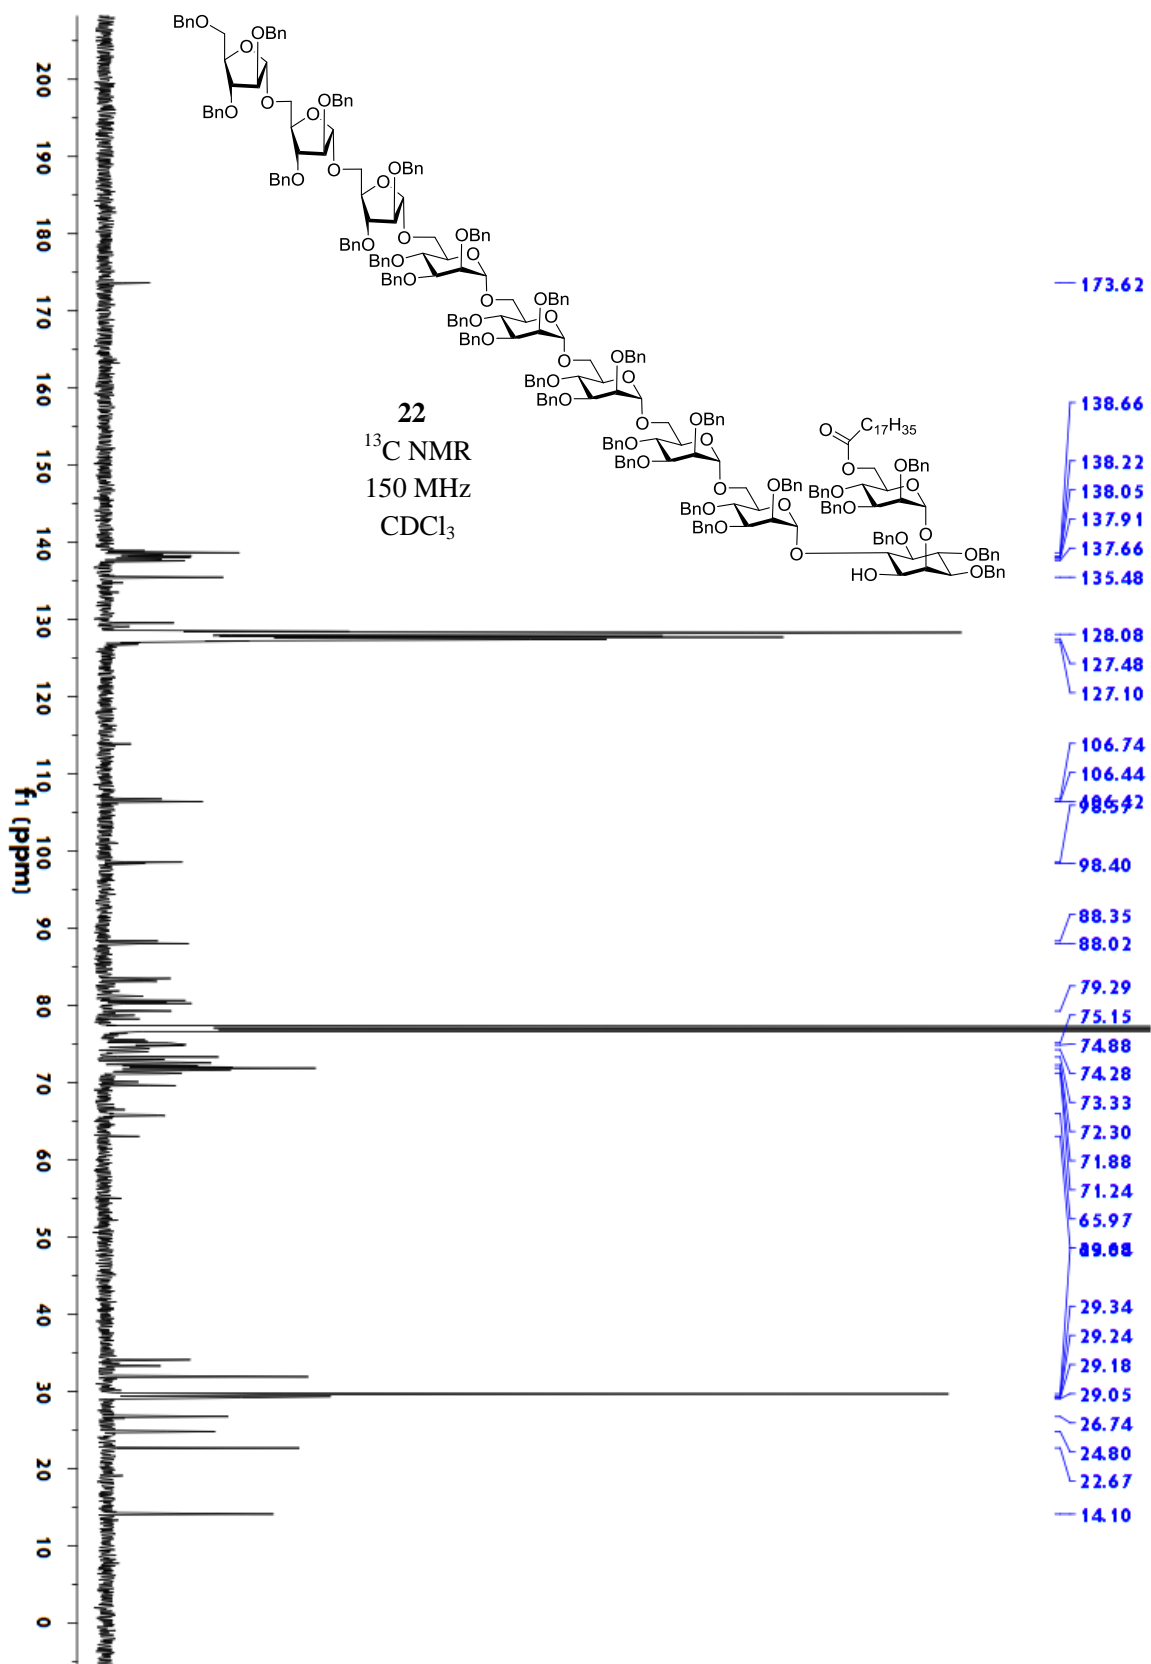

Sample Name:

Data Collected on:

600-nmr600

Archive directory:

/home/vmr1/vmrays/probes/probe\_calibs

Sample directory:

Fidfile: gc057

ulse Sequence: gc057

olvent: cdcl3

ata collected on: Sep 12 2013

Agilent 600 NMR spectrometer

613097

Agilent Technologies

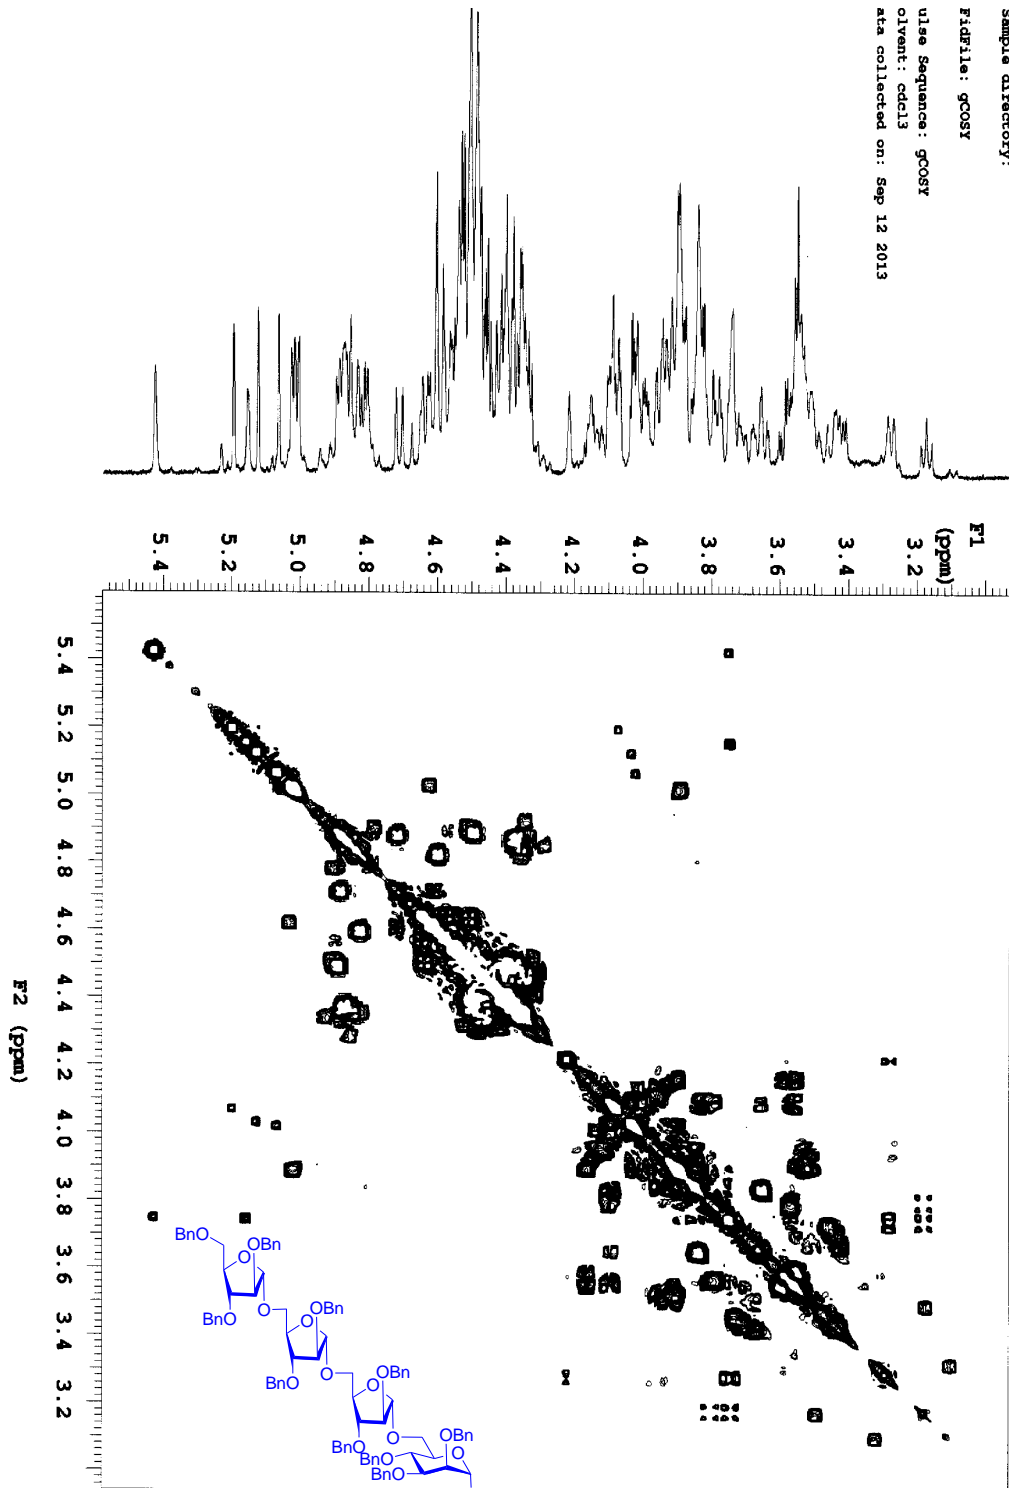

22  
 $^1\text{H}-^1\text{H}$  COSY  
600 MHz  
 $\text{CDCl}_3$

|   |         |         |       |
|---|---------|---------|-------|
| 1 | 17983.1 | 119.242 | 14.5  |
| 2 | 13683.8 | 90.734  | -13.6 |
| 3 | 12691.9 | 84.157  | 18.2  |
| 4 | 10964.7 | 72.704  | -13.0 |
| 5 | 10941.7 | 72.552  | -13.1 |
| 6 | 10841.2 | 71.886  | -22.2 |

GJ130917

Agilent 600 NMR spectrometer Standard\_proton

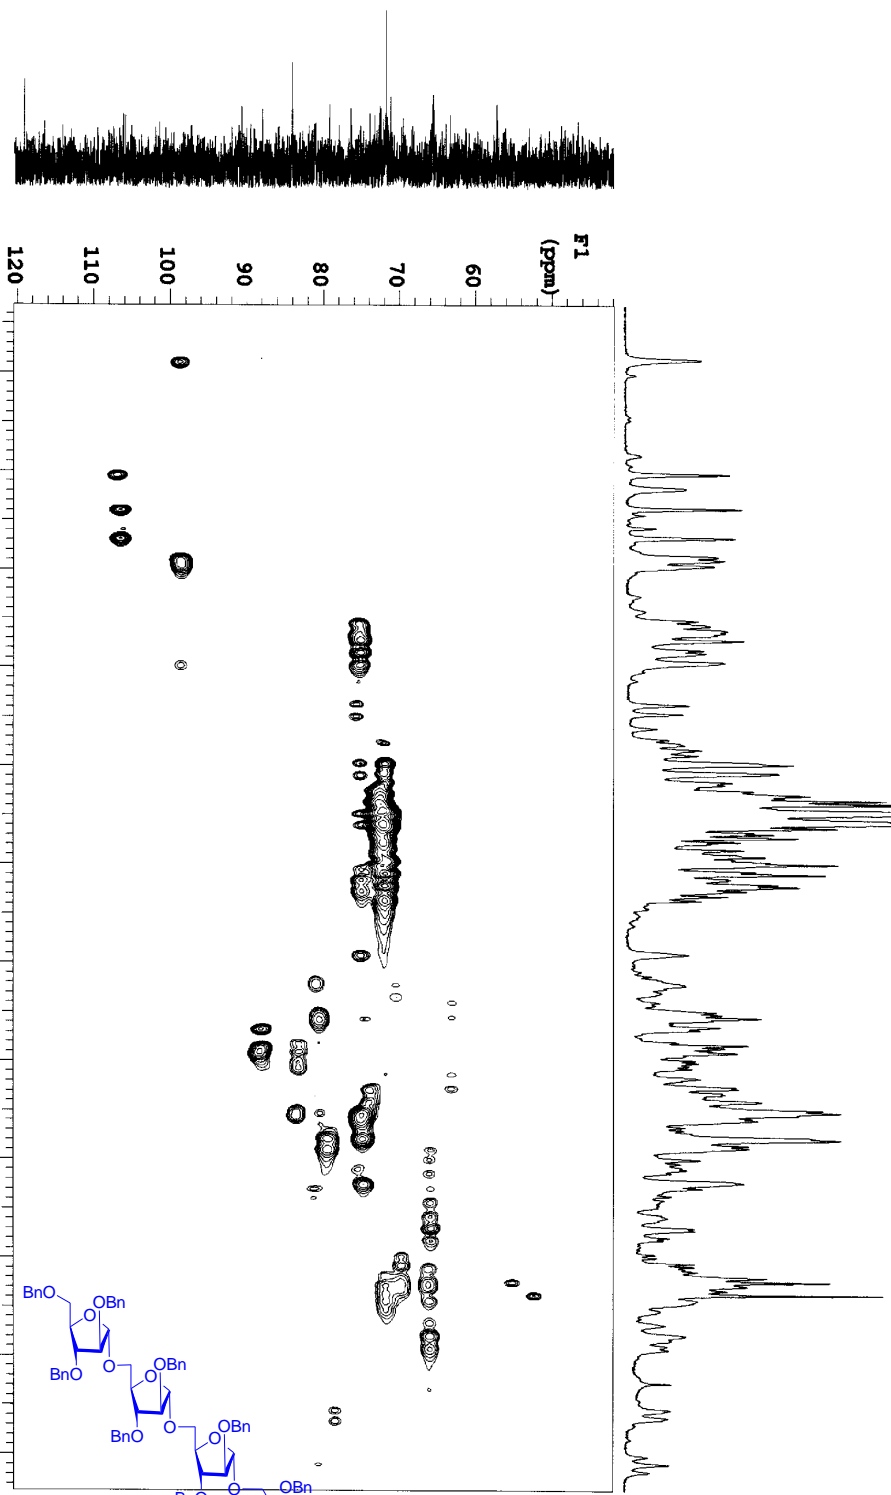

F1 (ppm)

F2 (ppm)

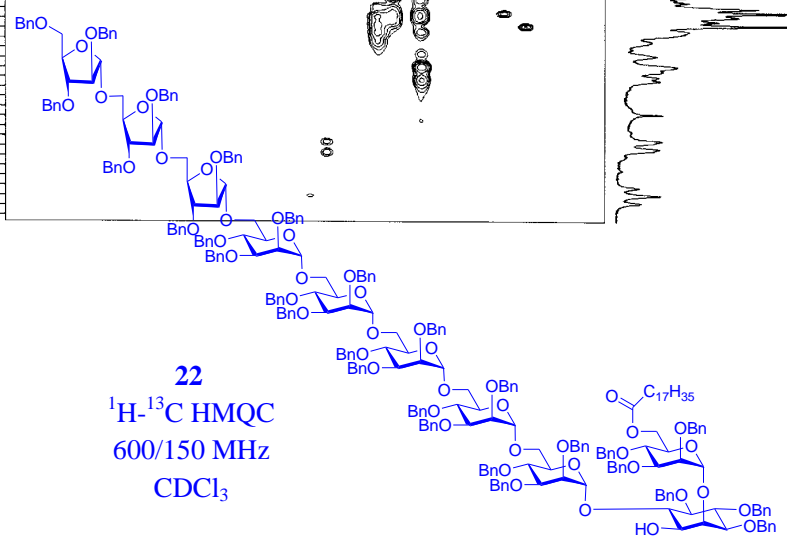

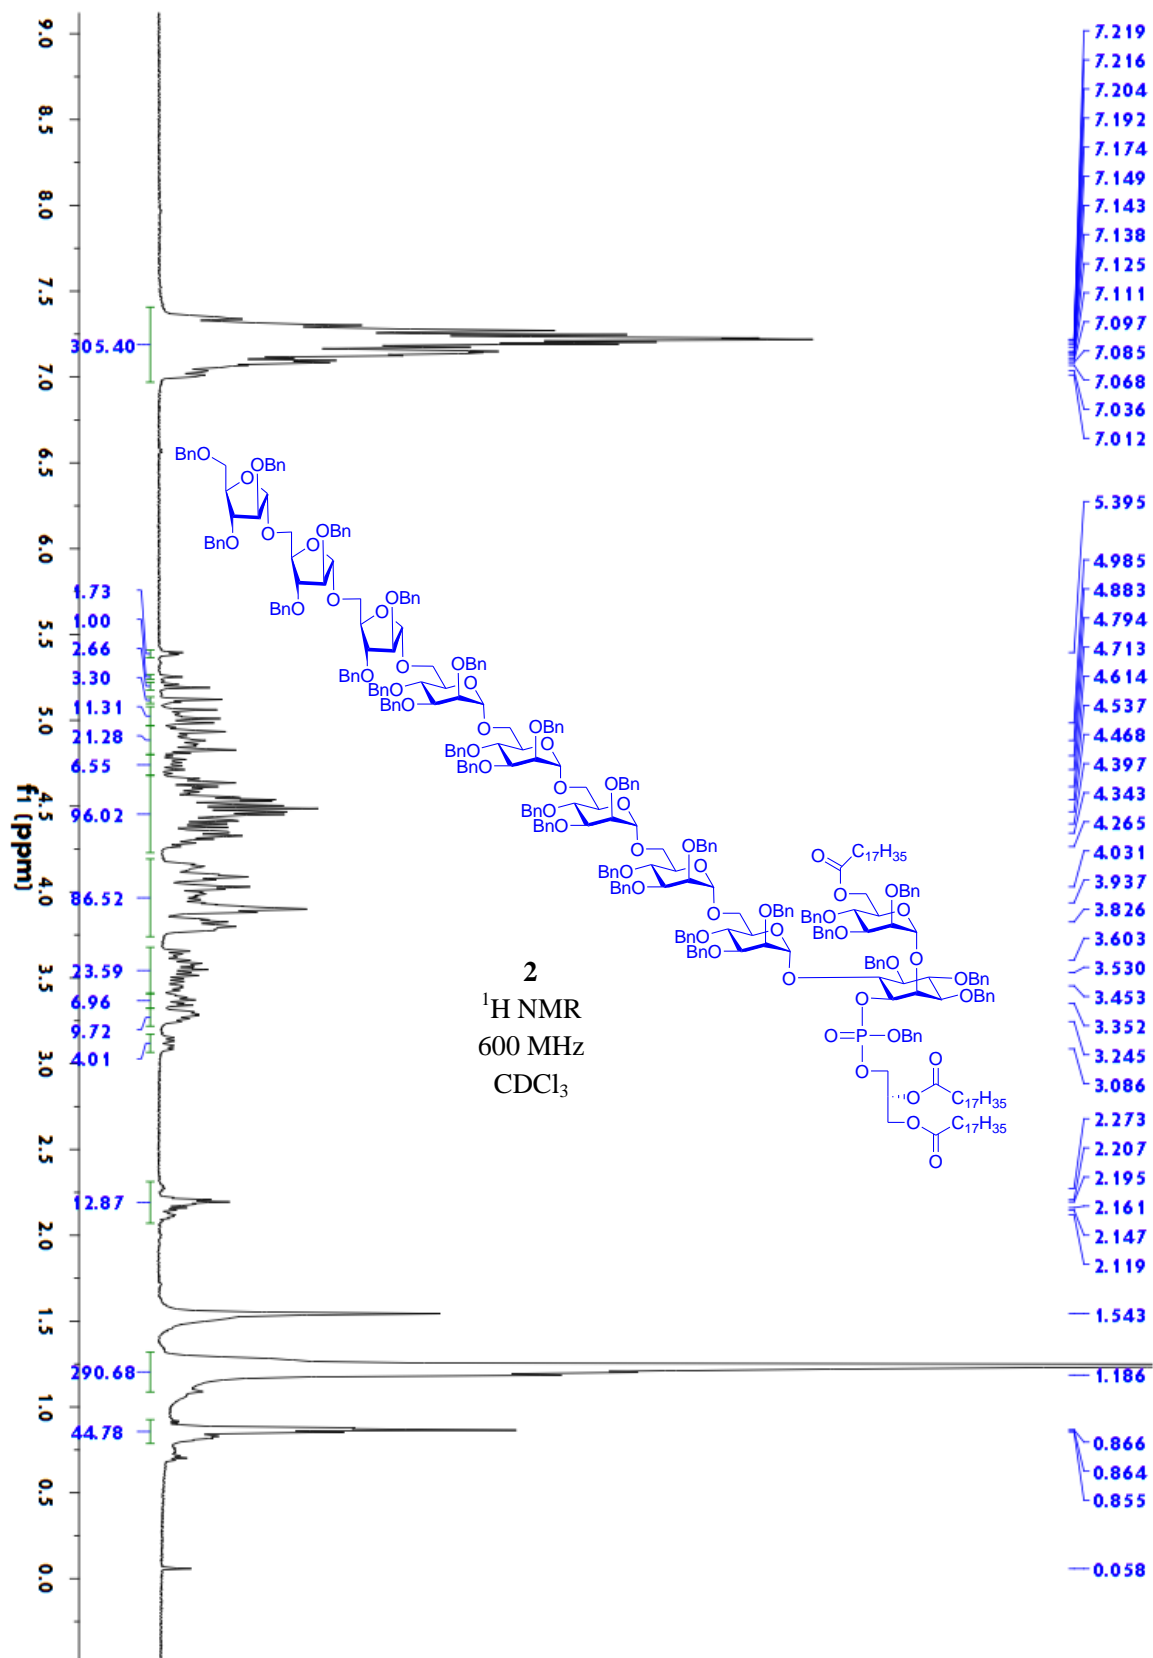

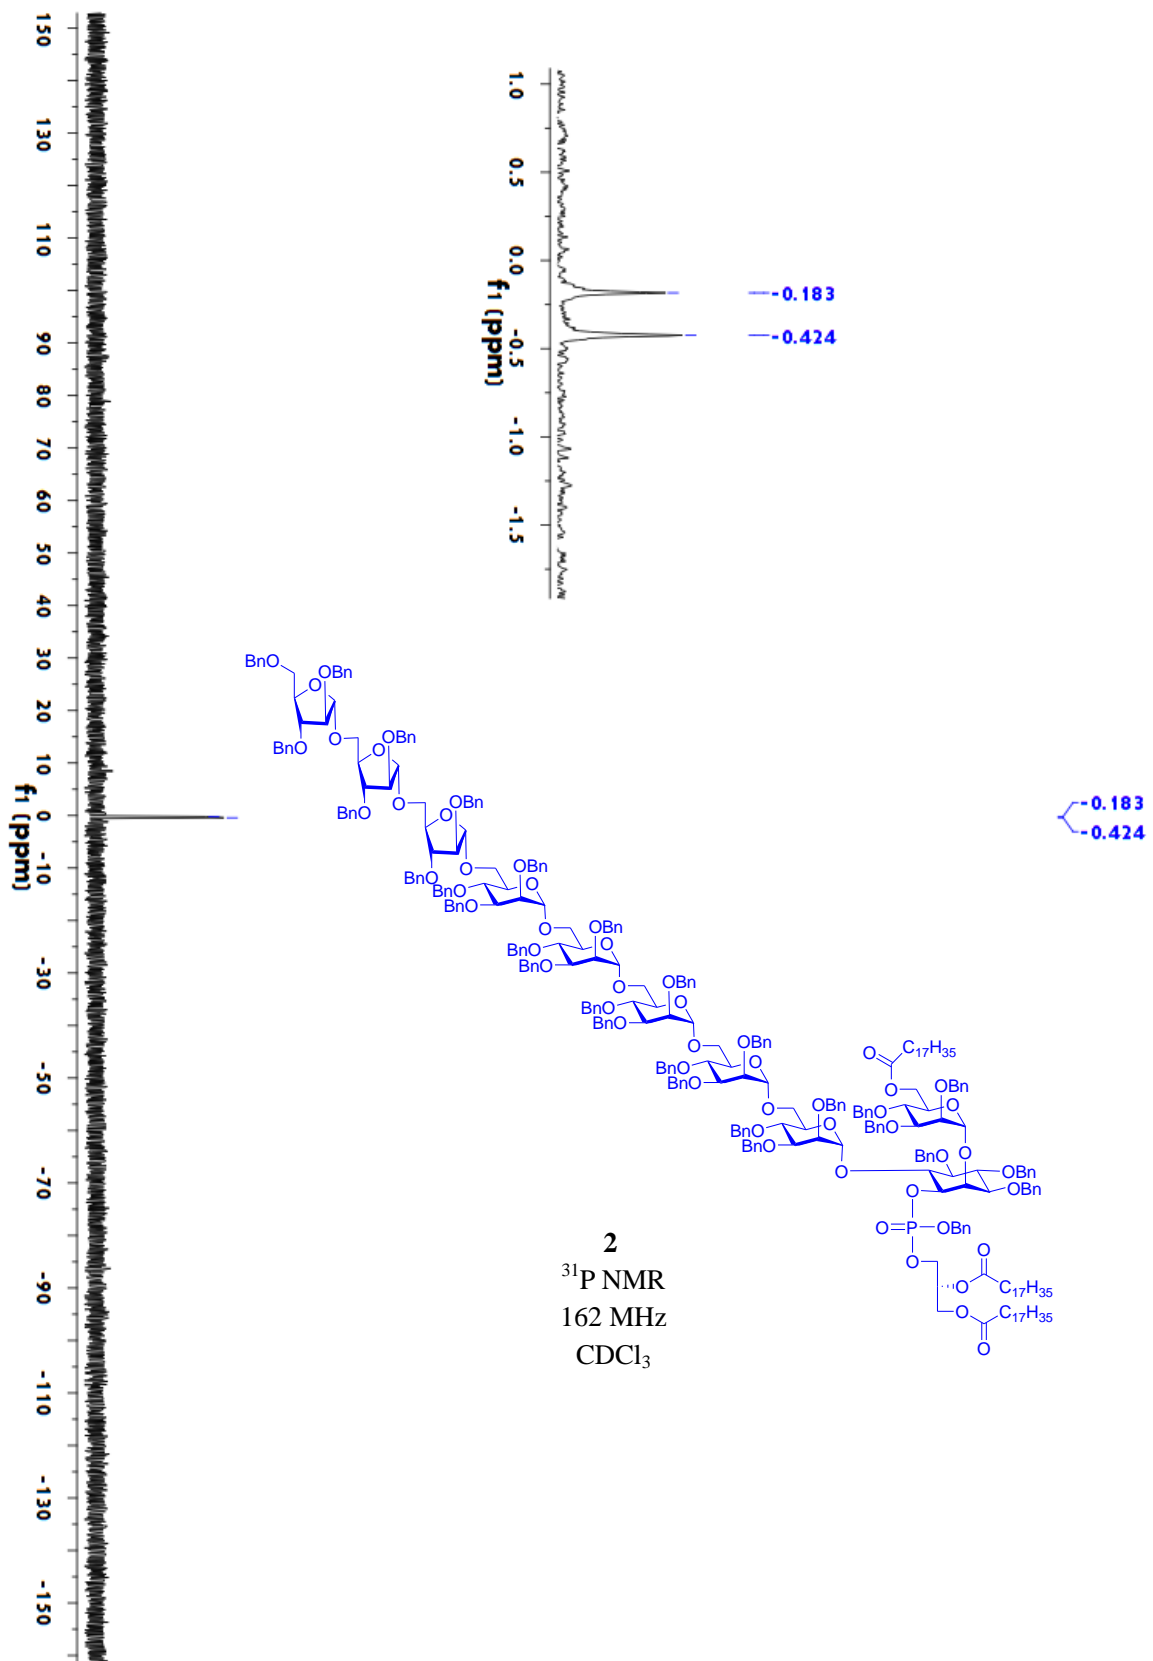







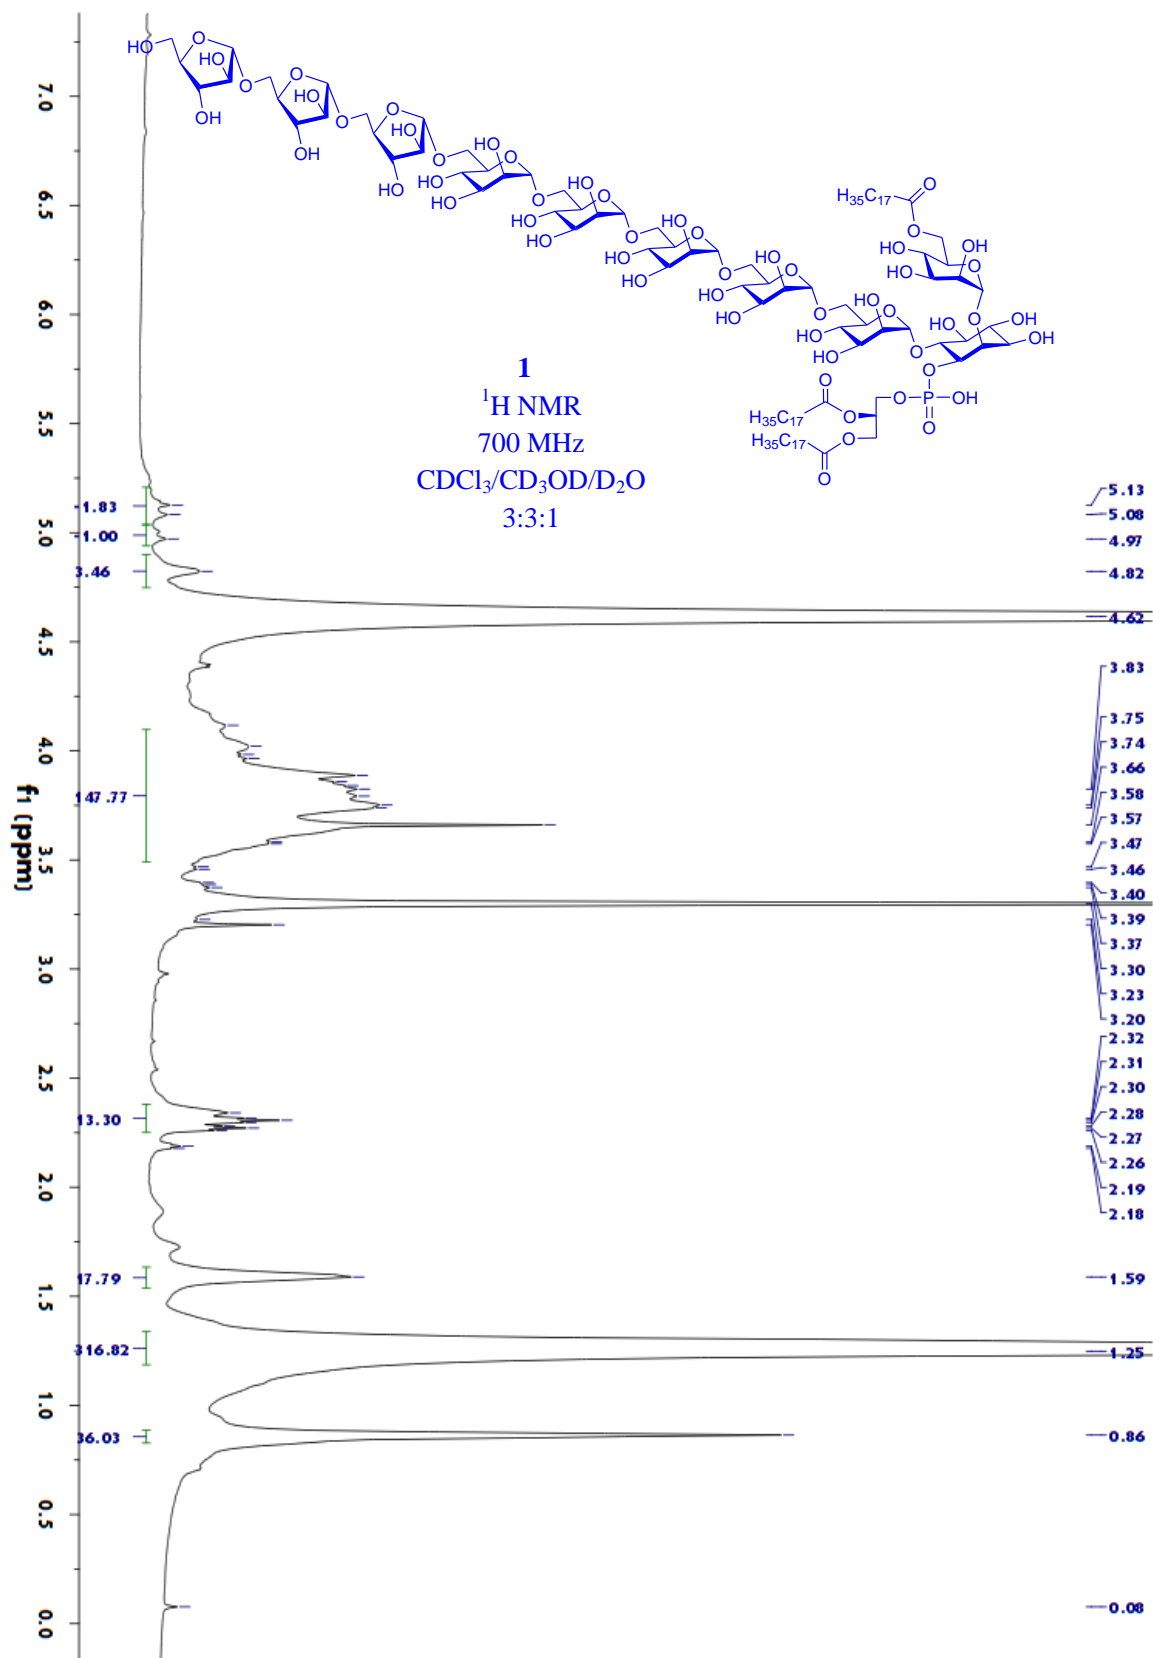

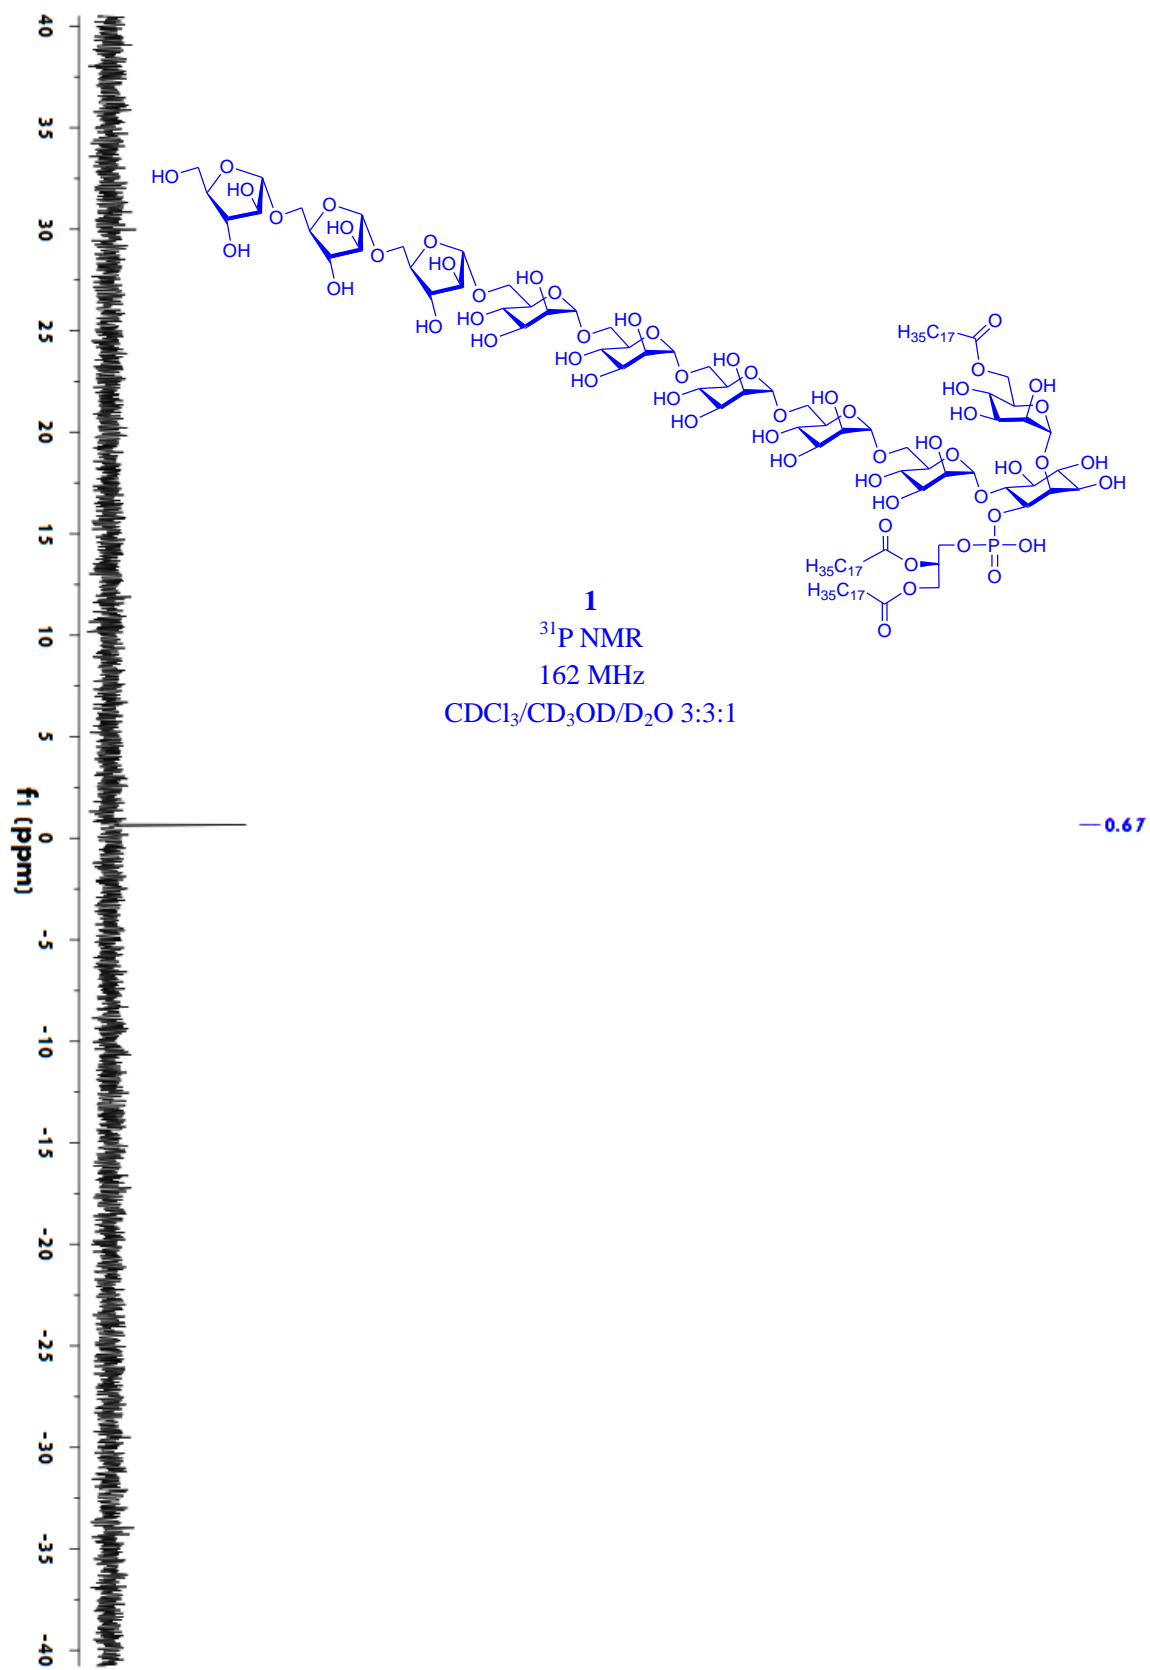

Supplement: ol4036903_si_001.pdf [file ol4036903_si_001.pdf]
